# Supplementary material for: Stereoselective synthesis of spirocyclohexadiene-pyrazolones via organic base and/or hydrogen bonding assisted [3 + 3] annulation reactions
Source: Royal Society of Chemistry journal article supplement (doi:10.1039/c8qo01391h), 2019-01-01
Supplement: c8qo01391h1.pdf [file c8qo01391h1.pdf]

**SUPPORTING INFORMATION**

**Stereoselective Synthesis of Spiro Cyclohexadiene-Pyrazolones via  
Organic Base and/or Hydrogen Bonding Assisted [3+3] Annulation  
Reaction**

Bing-Bing Sun,<sup>a</sup> Jun-Qi Zhang,<sup>a</sup> Jun-Bo Chen,<sup>a</sup> Wei-Tai Fan,<sup>a</sup> Jie-Qiang Yu,<sup>a</sup> Jia-Ming Hu<sup>a</sup> and Xing-Wang Wang<sup>\*a</sup>

<sup>a</sup> Key Laboratory of Organic Synthesis of Jiangsu Province, College of Chemistry, Chemical Engineering and Materials Science, Soochow University, Suzhou 215123, P. R. China.

Fax: (+86)-512-6588-0378; E-mail: [wangxw@suda.edu.cn](mailto:wangxw@suda.edu.cn)

**LIST OF CONTENTS:**

| Entry | Contents                                          | Page No |
|-------|---------------------------------------------------|---------|
| 1     | General information                               | 1       |
| 2     | Screening of catalysts and condition optimization | 2–4     |
| 3     | NMR spectra of new compounds                      | 4–72    |
| 4     | HPLC spectra of new compounds                     | 72–96   |
| 5     | Crystal data and ORTEP diagram for compound       | 96–100  |

## 1. General information

Unless otherwise noted, all reactions were carried out under an atmosphere of nitrogen in oven-dried glasswares with magnetic stirring, all reagents obtained from commercial suppliers were used without further purification. Reactions were monitored by thin-layer chromatography (TLC) on silica gel precoated glass plates ( $0.2 \pm 0.03$  mm thickness, GF-254, particle size 0.01–0.04 mm) from Yantai Chemical Industry Research Institute. TLC was visualized by UV fluorescence (254 nm). Flash column chromatography was performed with silica gel (particle size 0.04–0.05 mm).  $^1\text{H}$  NMR and  $^{13}\text{C}$  NMR spectroscopic data were recorded using Bruker AMX-400 instrument and calibrated by using the residual solvent peaks as an internal reference ( $\text{CDCl}_3$  [ $^1\text{H}$ : 7.26,  $^{13}\text{C}$ : 77.23]). Coupling constants ( $J$ ) are given in Hz. High-resolution mass spectra (HRMS) for all the compounds were determined on a Micromass GCT-TOF mass spectrometer with ESI or CI resource. High performance liquid chromatography (HPLC) was performed on Agilent 1200 Series chromatographs using a Daicel Chiralpak IA-H, or AD-H column ( $0.46 \text{ cm} \times 25 \text{ cm}$ ). The racemic compounds for HPLC spectrum were obtained by DABCO catalyzed reactions, with the exception of **4ab**, **4na**, **4ca**, **4ha** and **4ua** catalyzed by  $\text{Et}_3\text{N}$ . X-ray data were recorded on a Rigaku Mercury CCD/AFC diffractometer. Optical rotations are reported as follows:  $[\alpha]_{20}^{\text{D}}$  (c in g per 100 mL, solvent).

## 2. Screening of catalysts and condition optimization

### Scheme S1. Optimization of the reaction conditions<sup>a</sup>

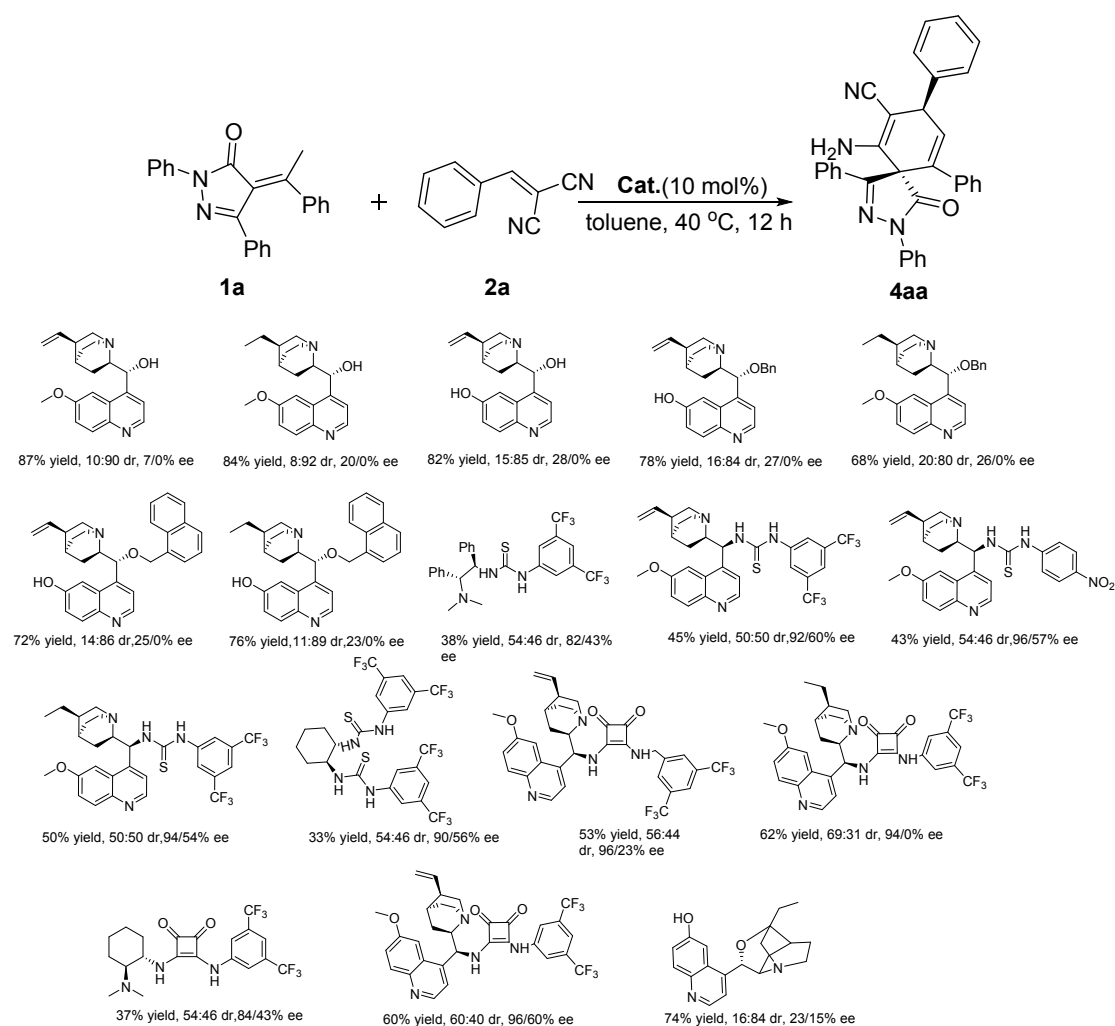

<sup>a</sup>) Unless otherwise noted, reactions were carried out with **1a** (0.12 mmol), **2a** (0.1 mmol), and 10 mol% **Cat.** in toluene (1.0 mL) at 40 °C

### Table S1. Optimization of solvents<sup>a</sup>

| entry | solvent           | yield (%) <sup>b</sup> | dr <sup>c</sup> | ee (%) <sup>d</sup> |
|-------|-------------------|------------------------|-----------------|---------------------|
| 1     | THF               | < 5%                   | --              | --                  |
| 2     | Et <sub>2</sub> O | < 5%                   | --              | --                  |
| 3     | EA                | < 5%                   | --              | --                  |

|           |                       |       |       |       |
|-----------|-----------------------|-------|-------|-------|
| 4         | dixone                | < 5%  | --    | --    |
| 5         | <i>o</i> -xylene      | 54    | 58:42 | 96/56 |
| 6         | <i>m</i> -xylene      | 55    | 55:45 | 96/64 |
| 7         | <i>p</i> -xylene      | 52    | 57:43 | 91/68 |
| 8         | mesitylene            | 70    | 57:43 | 91/71 |
| 9         | PhCF <sub>3</sub>     | 55    | 63:37 | 96/71 |
| 10        | PhF <sub>5</sub>      | 52    | 65:35 | 96/78 |
| 11        | 1,4-F <sub>2</sub> Ph | 50    | 64:36 | 97/77 |
| 12        | PhF                   | 47    | 65:35 | 81/35 |
| 13        | toluene               | 60    | 40:60 | 60/96 |
| 14        | HFIP                  | trace | --    | --    |
| <b>15</b> | <b>DCE</b>            | 67    | 70:30 | 97/62 |
| 16        | DCM                   | 60    | 65:35 | 94/58 |

a) Unless otherwise noted, reactions were carried out with **1a** (0.12 mmol), **2a** (0.1 mmol), and 10 mol% **IV** in corresponding solvent (1.0 mL) at 40 °C for 12 h. b) Isolated yield. c) Measured from the <sup>1</sup>H NMR of the crude reaction material. d) Determined by chiral HPLC.

**Table S2. Optimization of additives <sup>a</sup>**

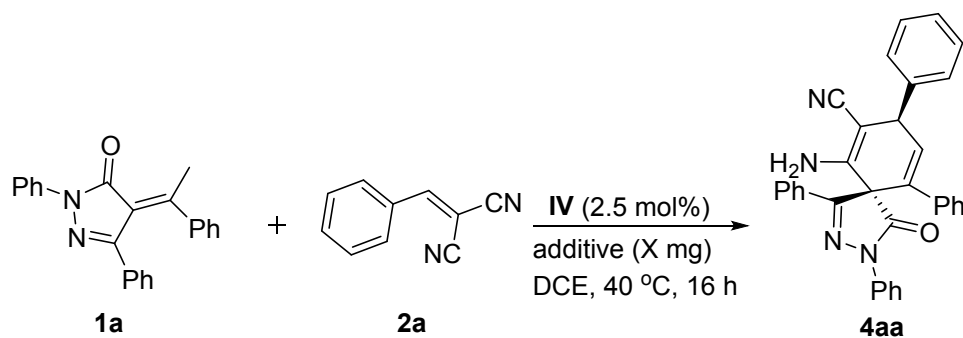

| entry          | additive                       | X  | yield (%) <sup>b</sup> | <i>dr</i> <sup>c</sup> | <i>ee</i> (%) <sup>d</sup> |
|----------------|--------------------------------|----|------------------------|------------------------|----------------------------|
| 1              | LiBr                           | 20 | trace                  | --                     | --                         |
| 2              | Tf <sub>2</sub> NH             | 20 | trace                  | --                     | --                         |
| 3              | 3 Å MS                         | 25 | 55                     | 75:25                  | 97/55                      |
| 4              | 4 Å MS                         | 25 | 50                     | 75:25                  | 97/50                      |
| 4              | 5 Å MS                         | 25 | 51                     | 75:25                  | 97/54                      |
| 4              | CsF                            | 20 | trace                  | --                     | --                         |
| 5 <sup>e</sup> | KI                             | 20 | 58                     | 66:34                  | 91/61                      |
| 7              | Ph <sub>3</sub> P              | 20 | 56                     | 70:30                  | 97/60                      |
| 8              | Ph <sub>3</sub> PO             | 20 | 58                     | 66:34                  | 97/60                      |
| 9              | K <sub>3</sub> PO <sub>4</sub> | 20 | 69                     | 60:40                  | 96/55                      |
| 10             | PhCOOH                         | 20 | trace                  | --                     | --                         |
| 11             | Trip-CPA                       | 5  | trace                  | --                     | --                         |
| 12             | Cu(OTf) <sub>2</sub>           | 5  | trace                  | --                     | --                         |

a) Unless otherwise noted, reactions were carried out with **1a** (0.12 mmol), **2a** (0.1 mmol), and 2.5 mol% **IV** in DCE (1.0 mL) at 40 °C for 16 h. b) Isolated yield. c)

Measured from the  $^1\text{H}$  NMR of the crude reaction material. <sup>d)</sup> Determined by chiral HPLC.

### 3. Copies of $^1\text{H}$ NMR and $^{13}\text{C}$ NMR spectra

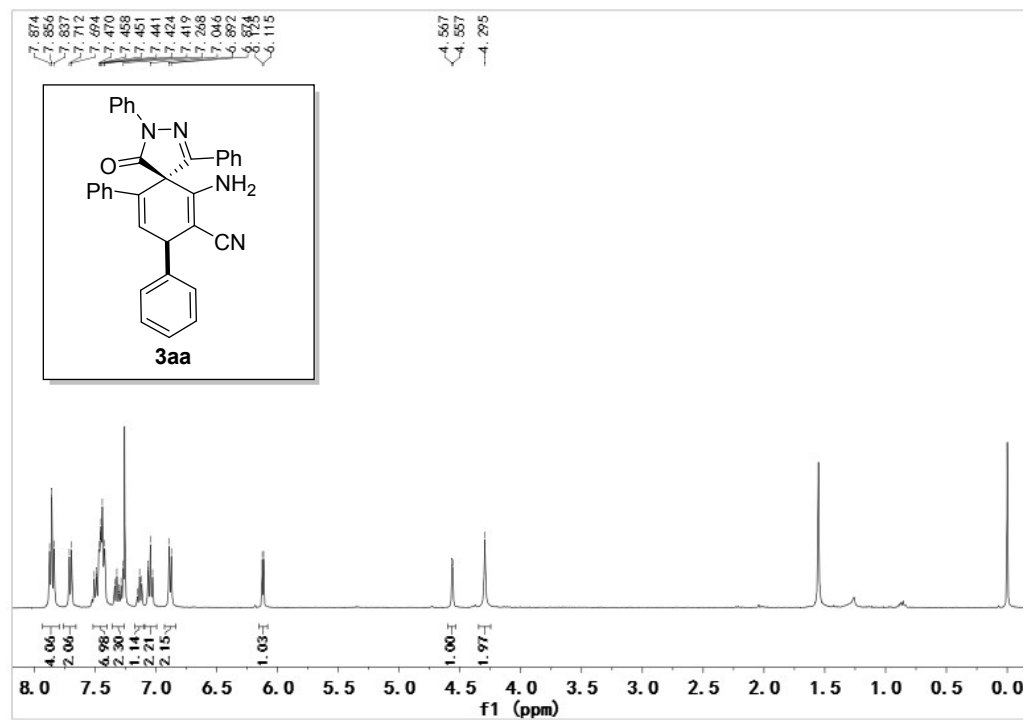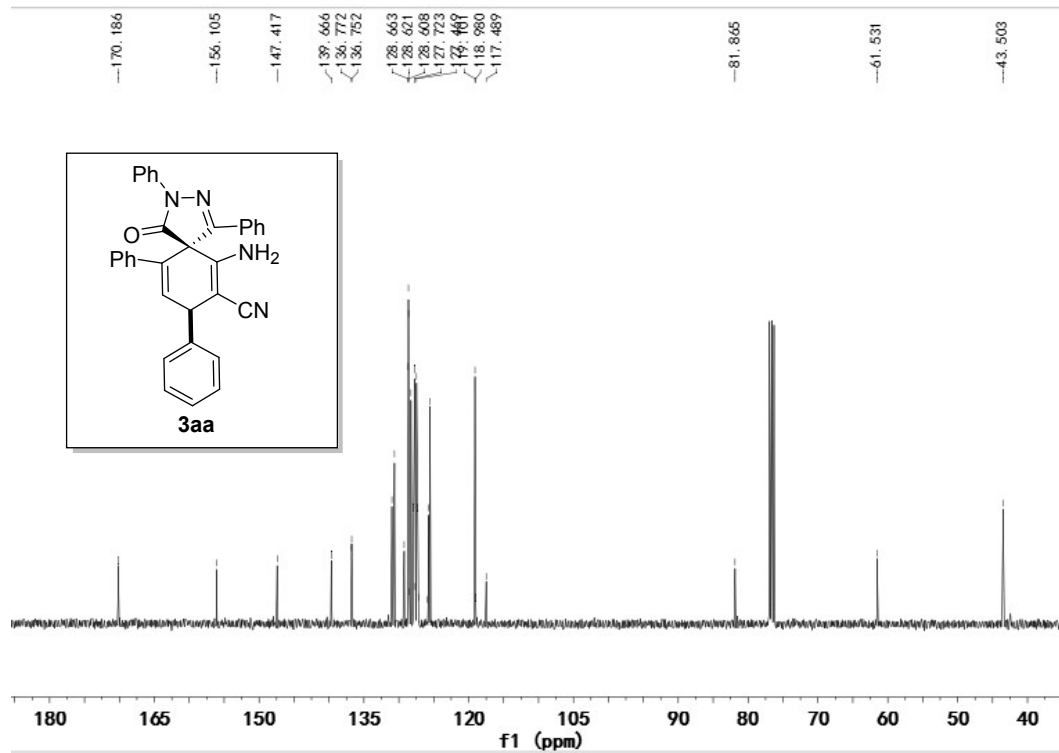

7.914  
7.898  
7.895  
7.724  
7.706  
7.703  
7.342  
7.323  
7.315  
7.312  
7.301  
7.280  
7.111  
6.891  
6.682  
5.972  
5.171  
5.161  
4.255

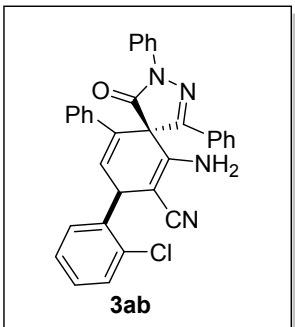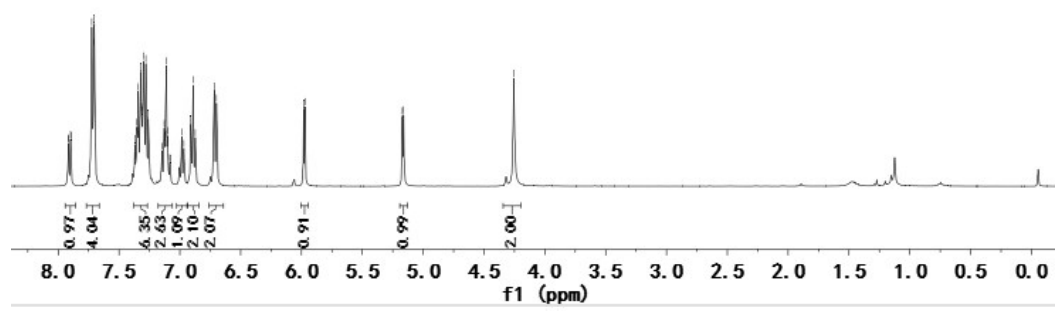

170.118  
156.089  
148.586  
136.960  
136.734  
136.609  
128.706  
128.056  
127.363  
127.360  
119.889  
117.193  
80.218  
61.514  
39.068

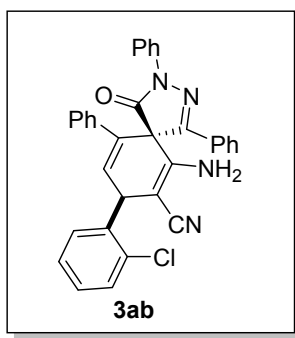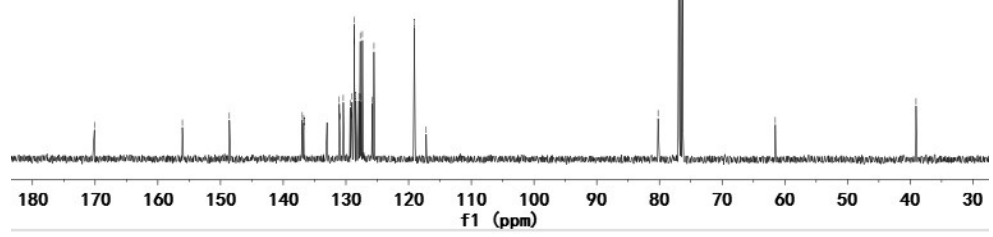

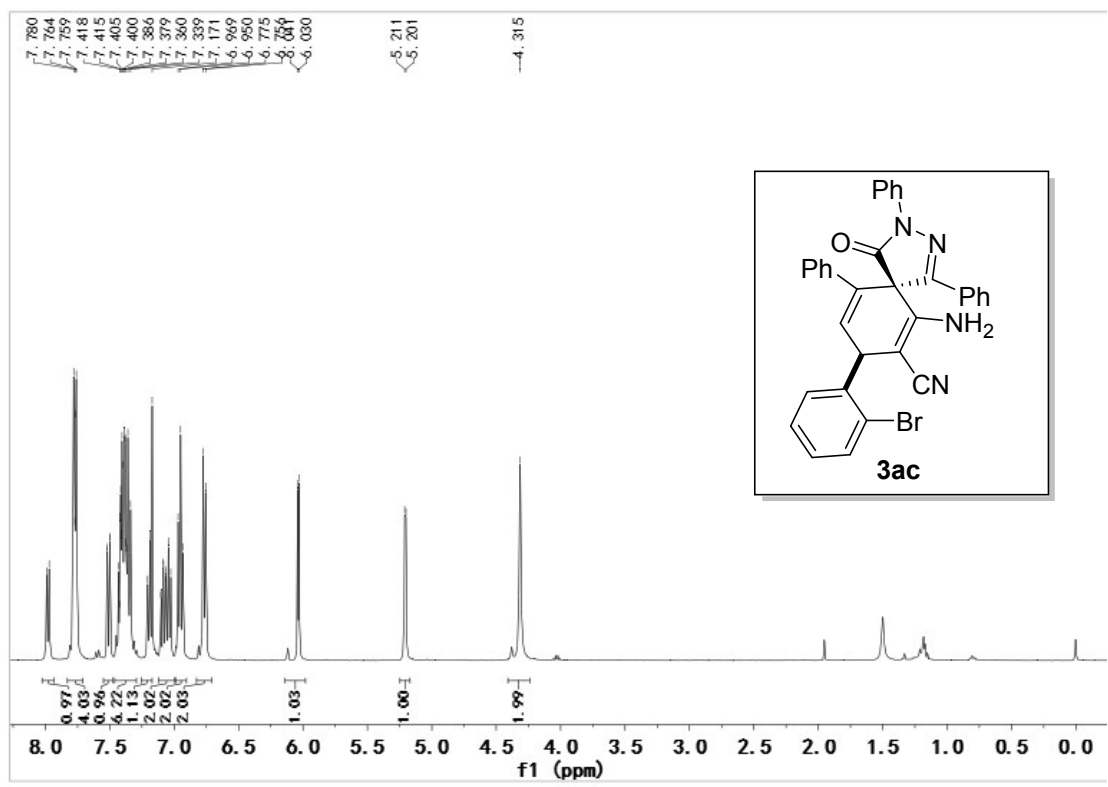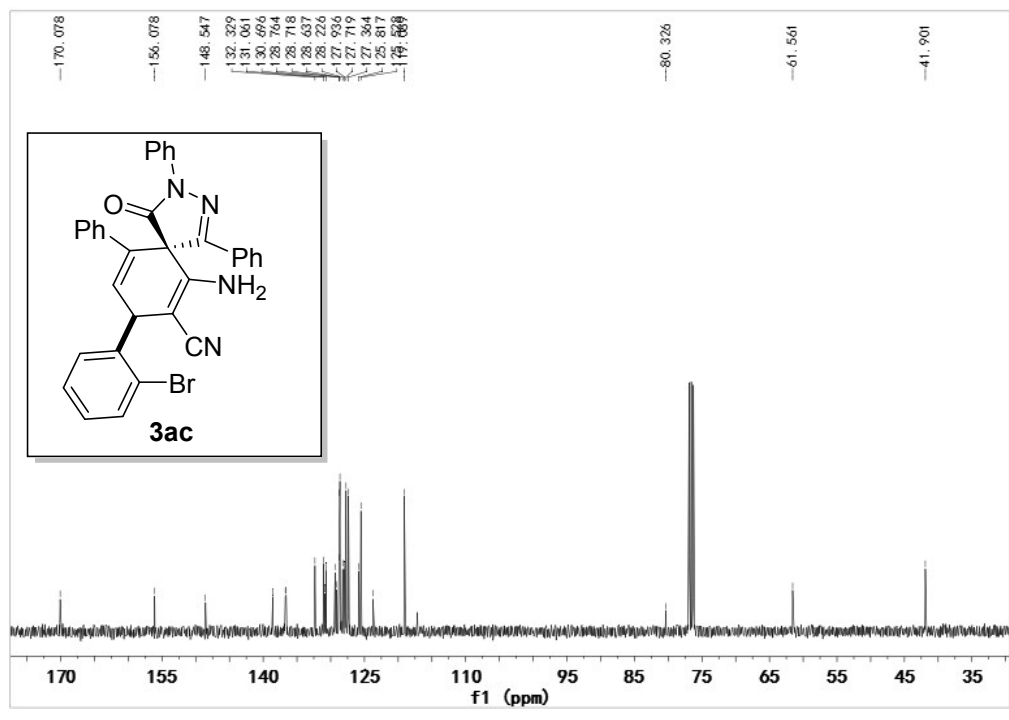

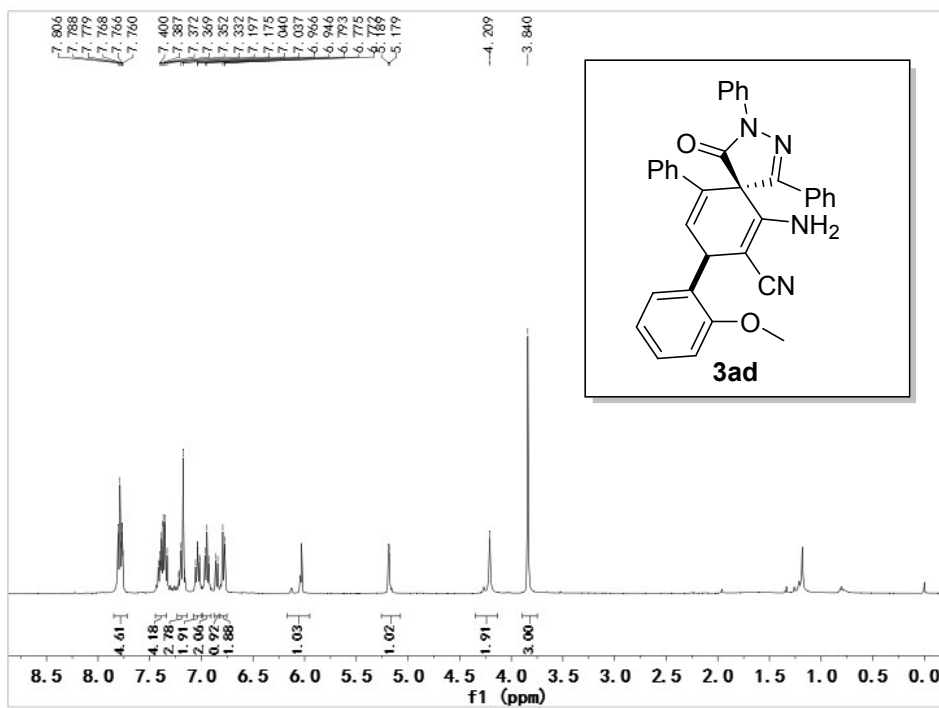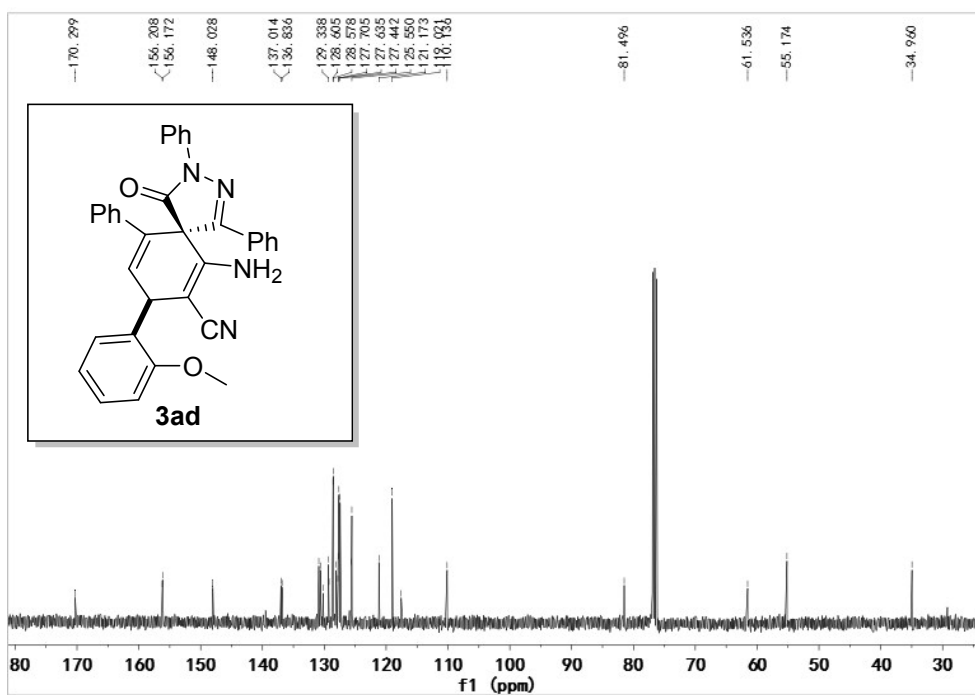



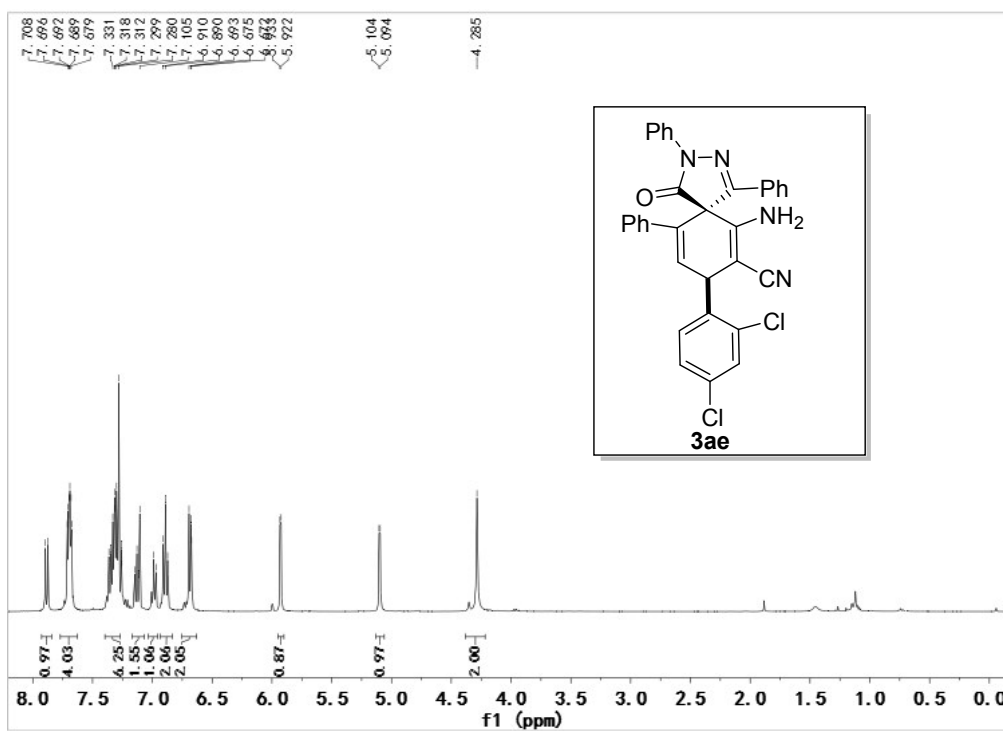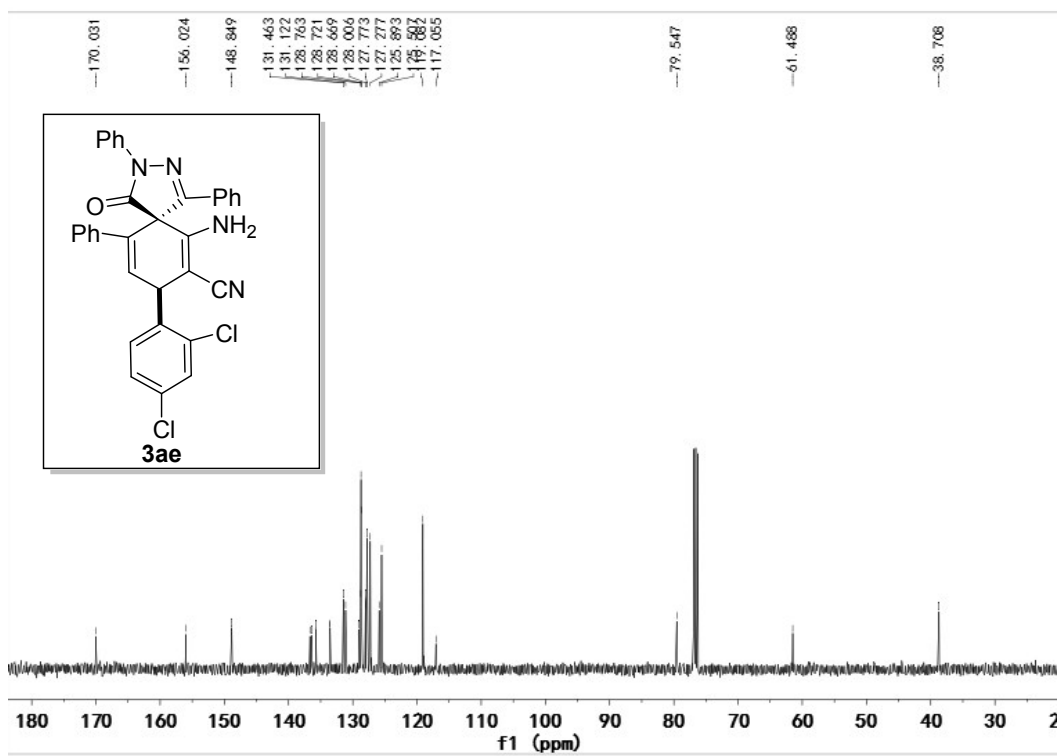

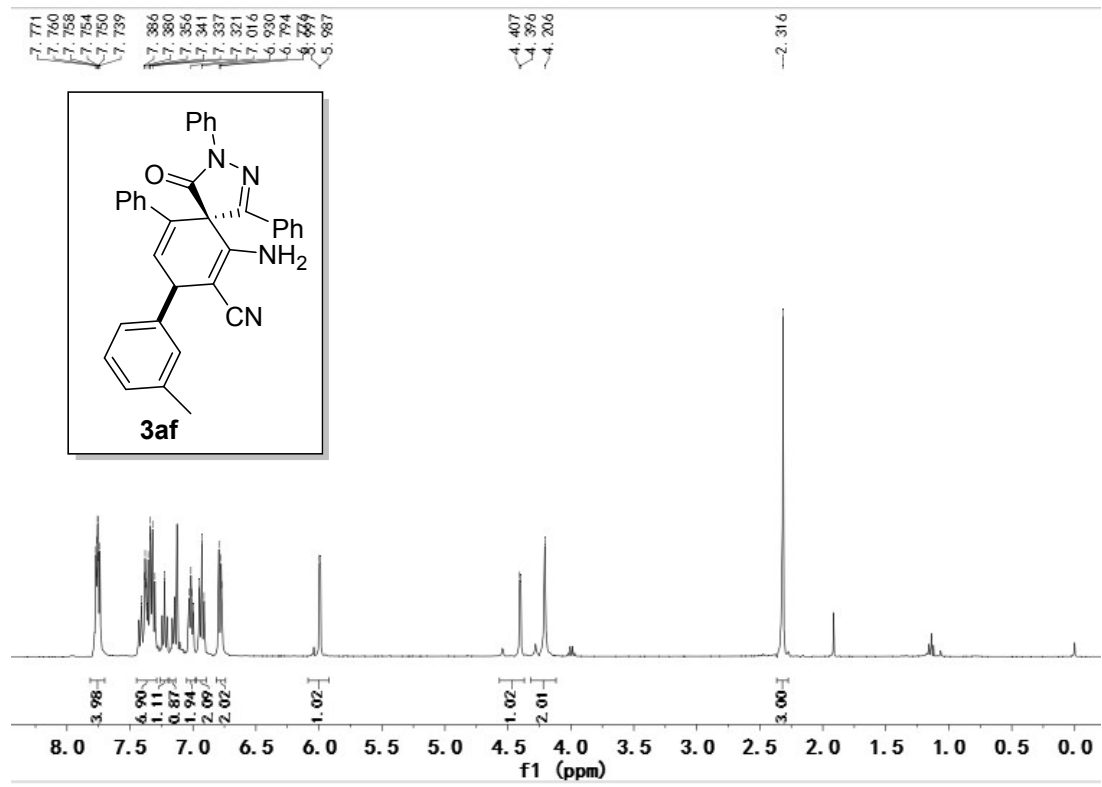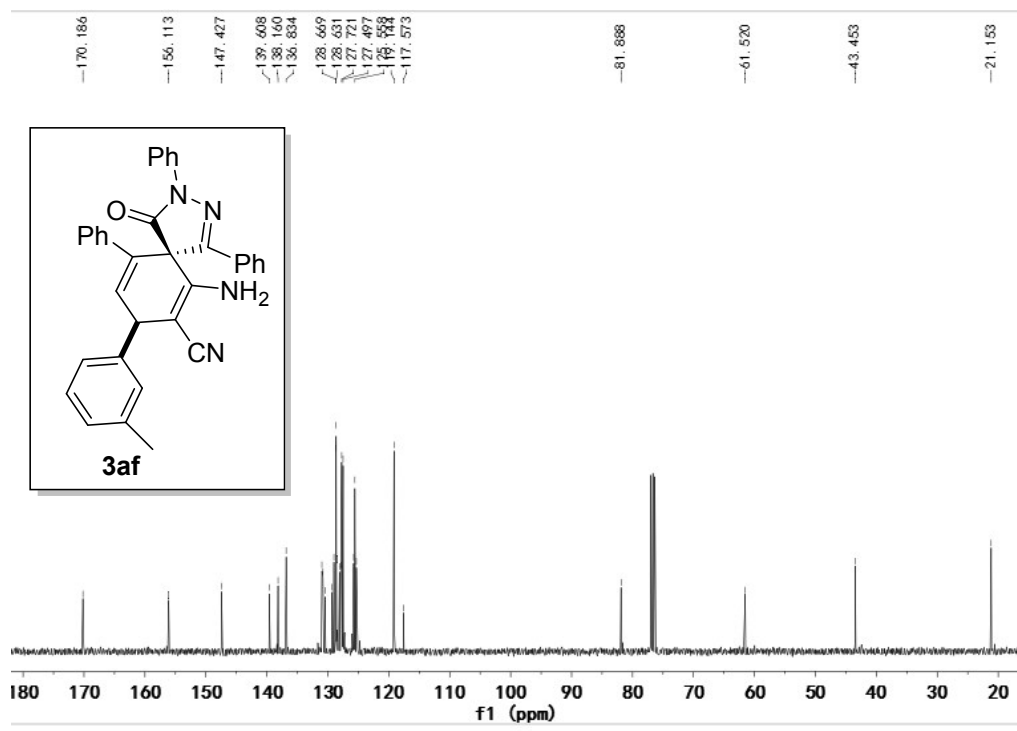

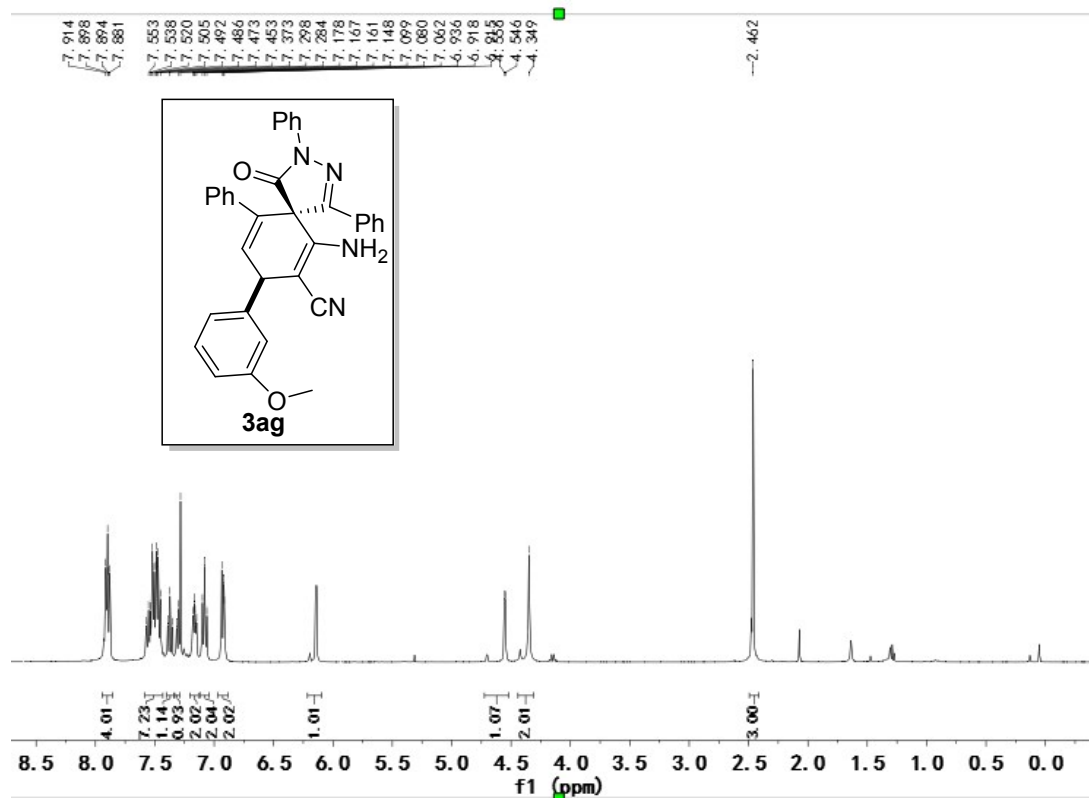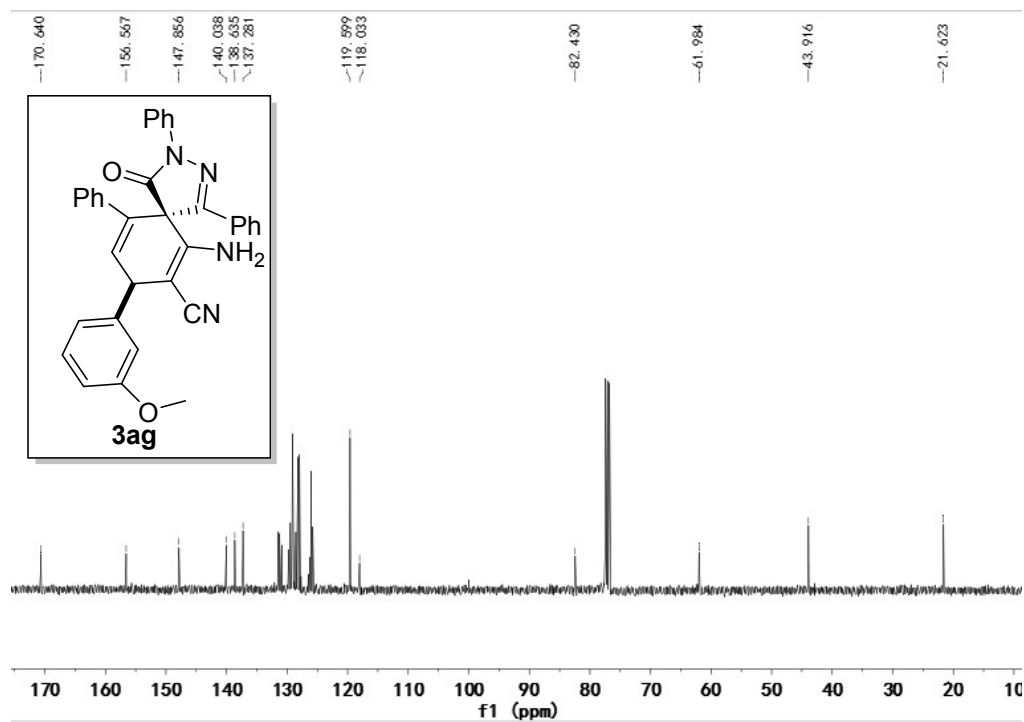

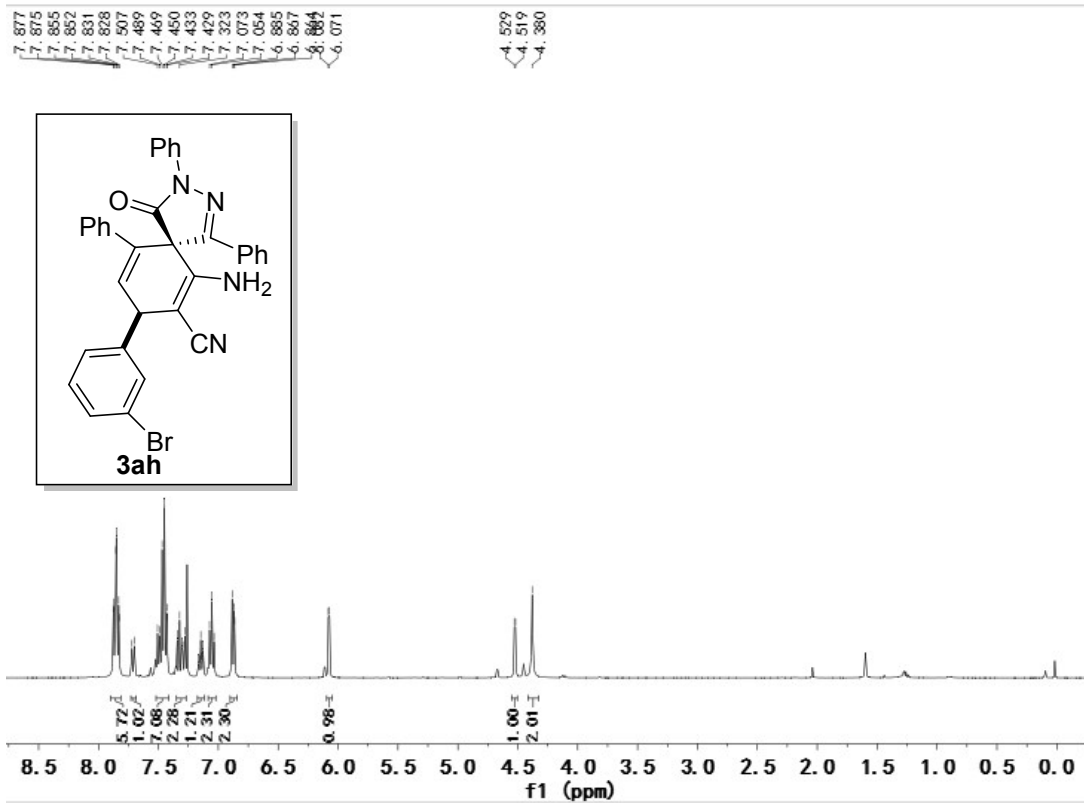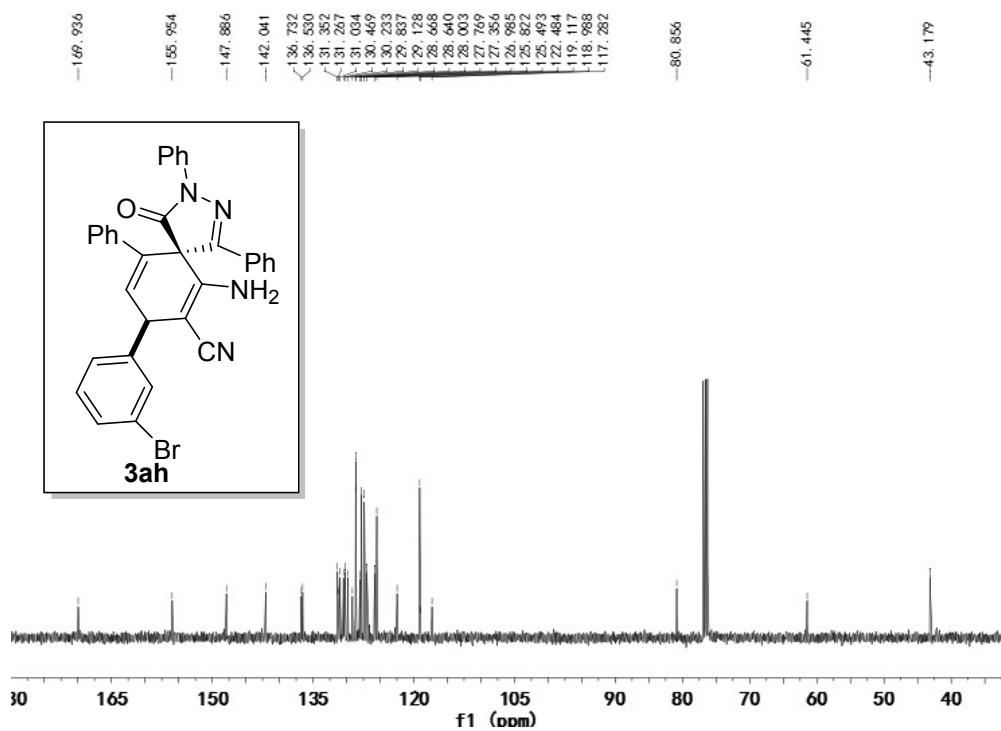

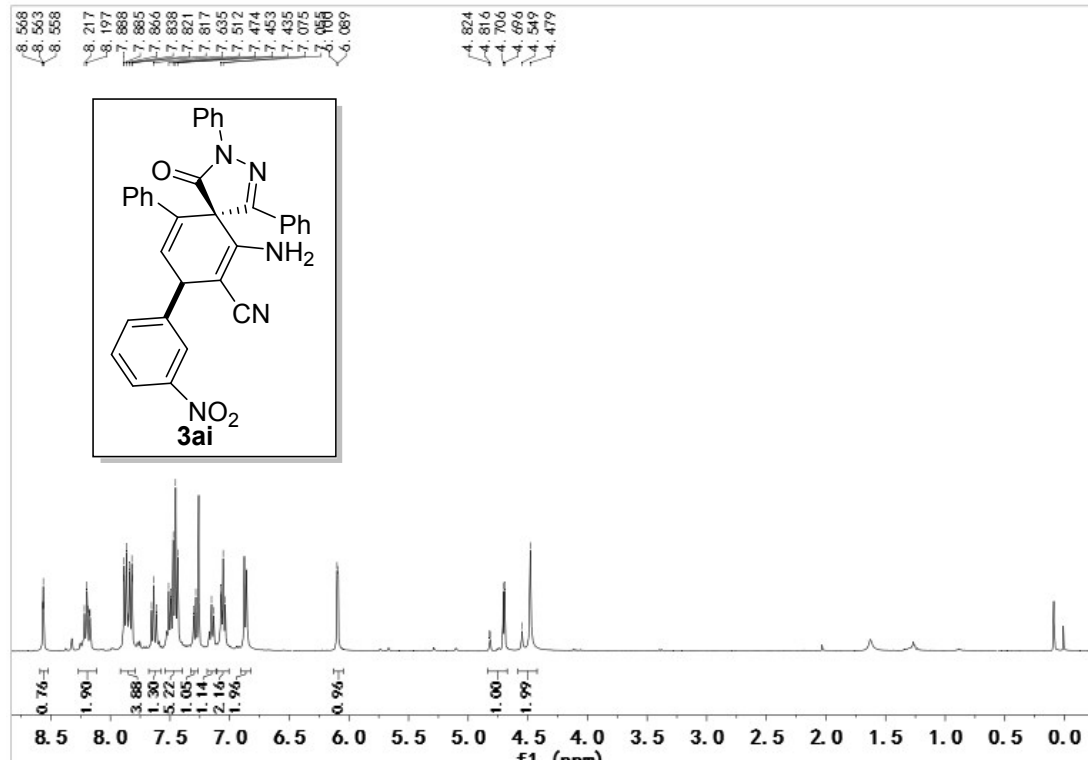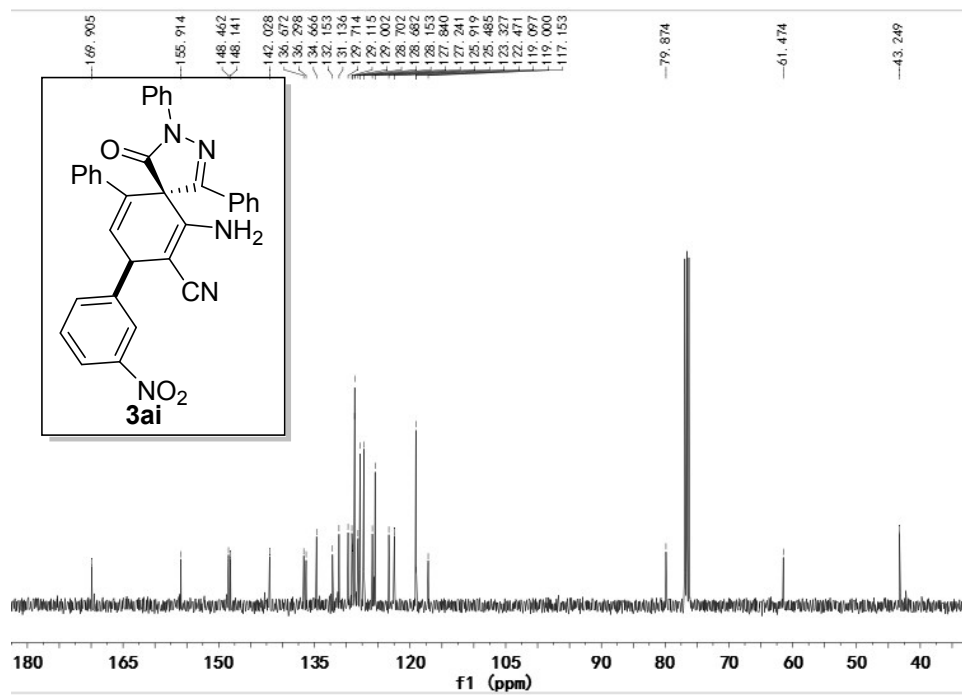

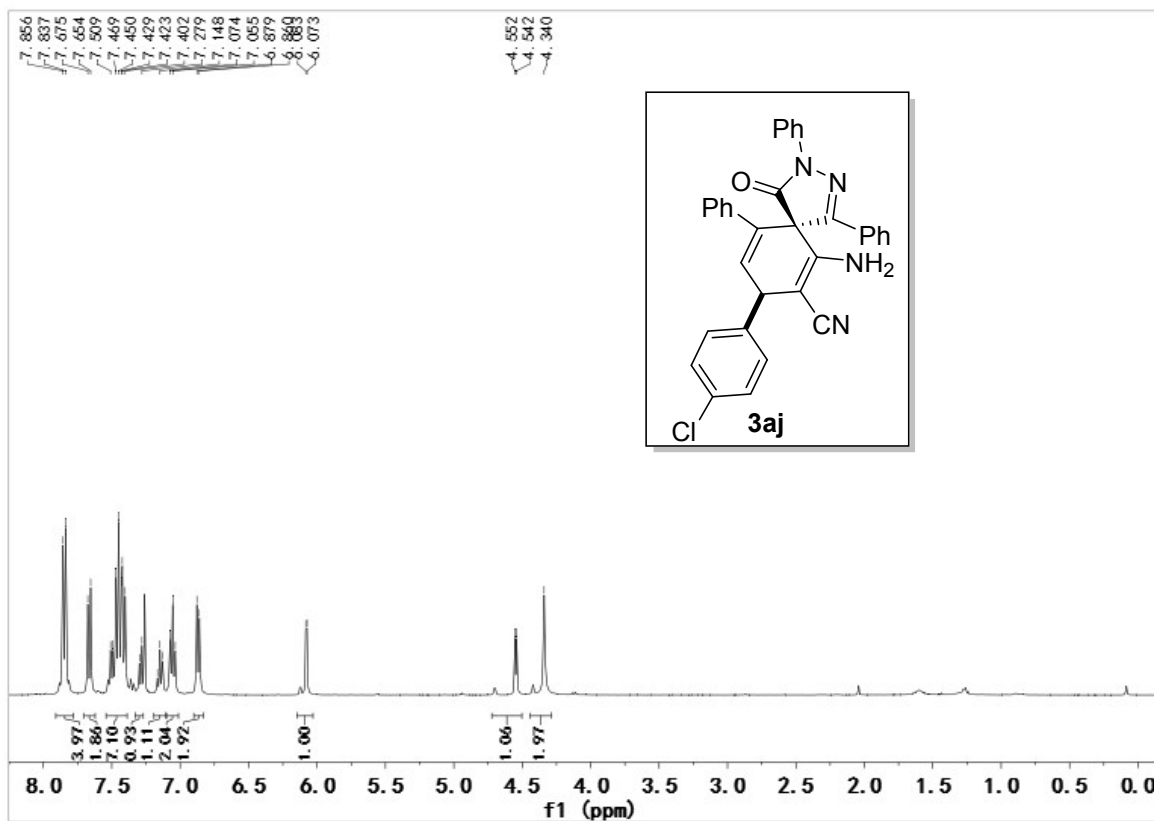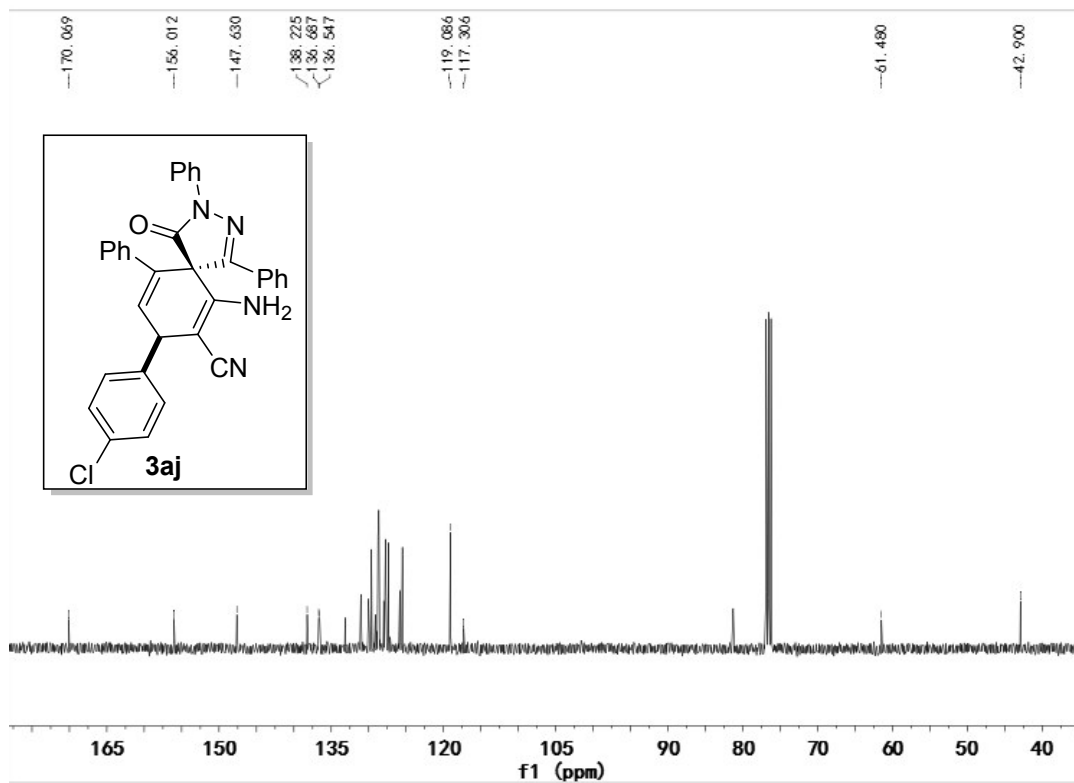

7.688  
7.669  
7.453  
7.431  
7.407  
7.385  
7.300  
7.282  
7.264  
7.260  
7.111  
7.092  
6.906  
6.886  
6.708  
6.691  
6.672  
5.901

4.370  
4.360  
4.182

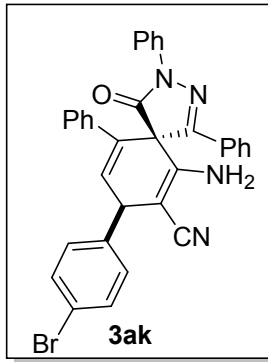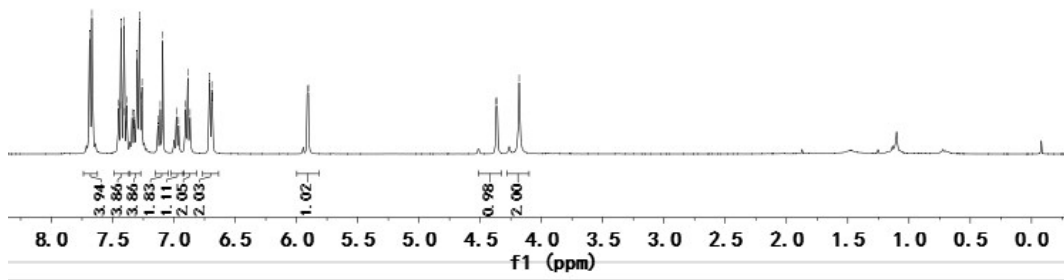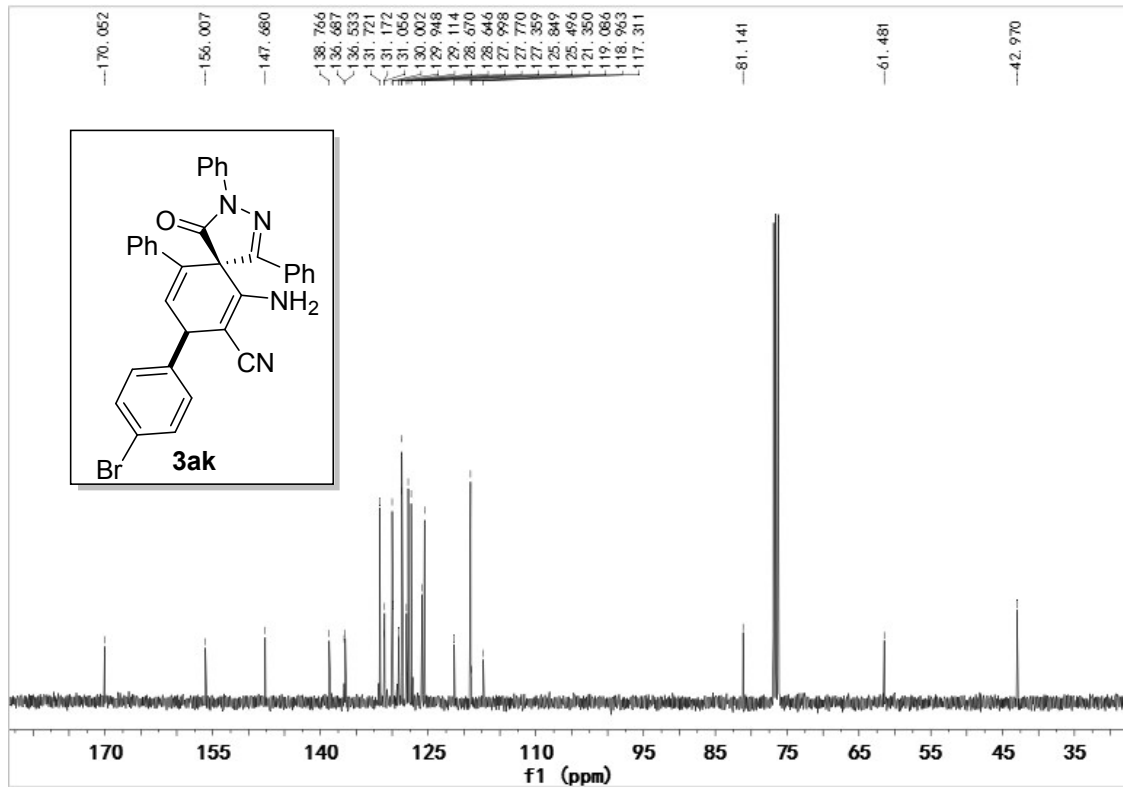

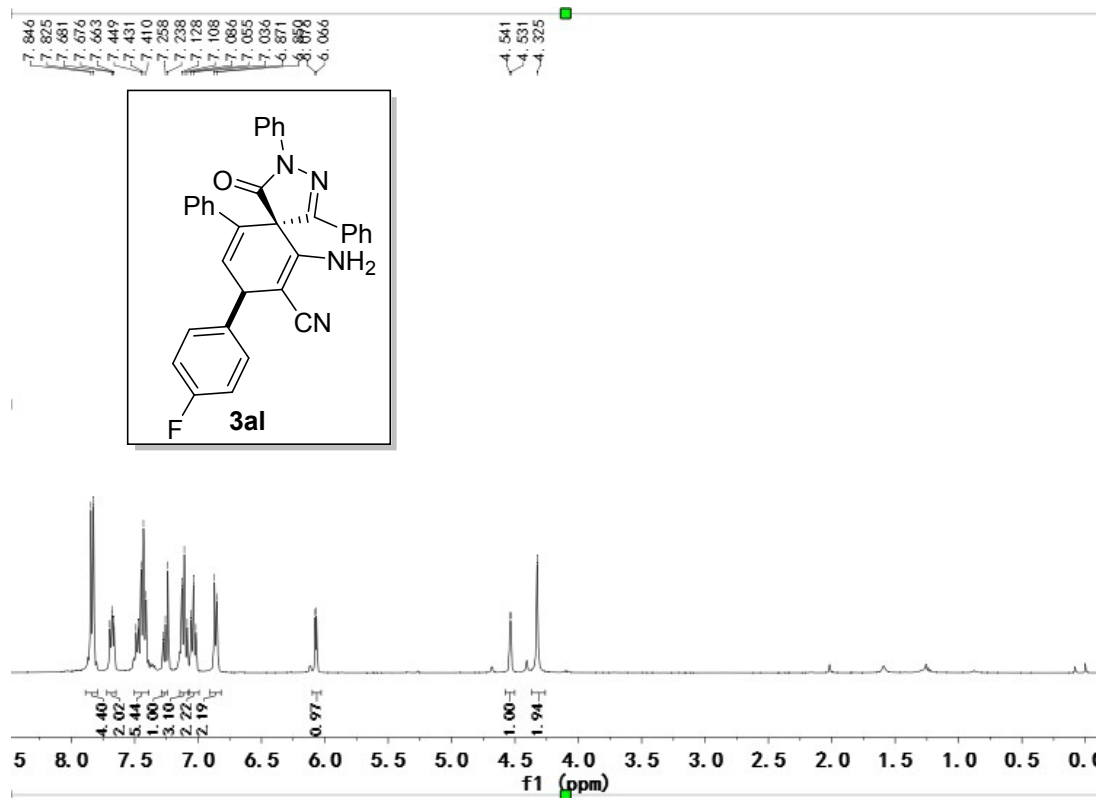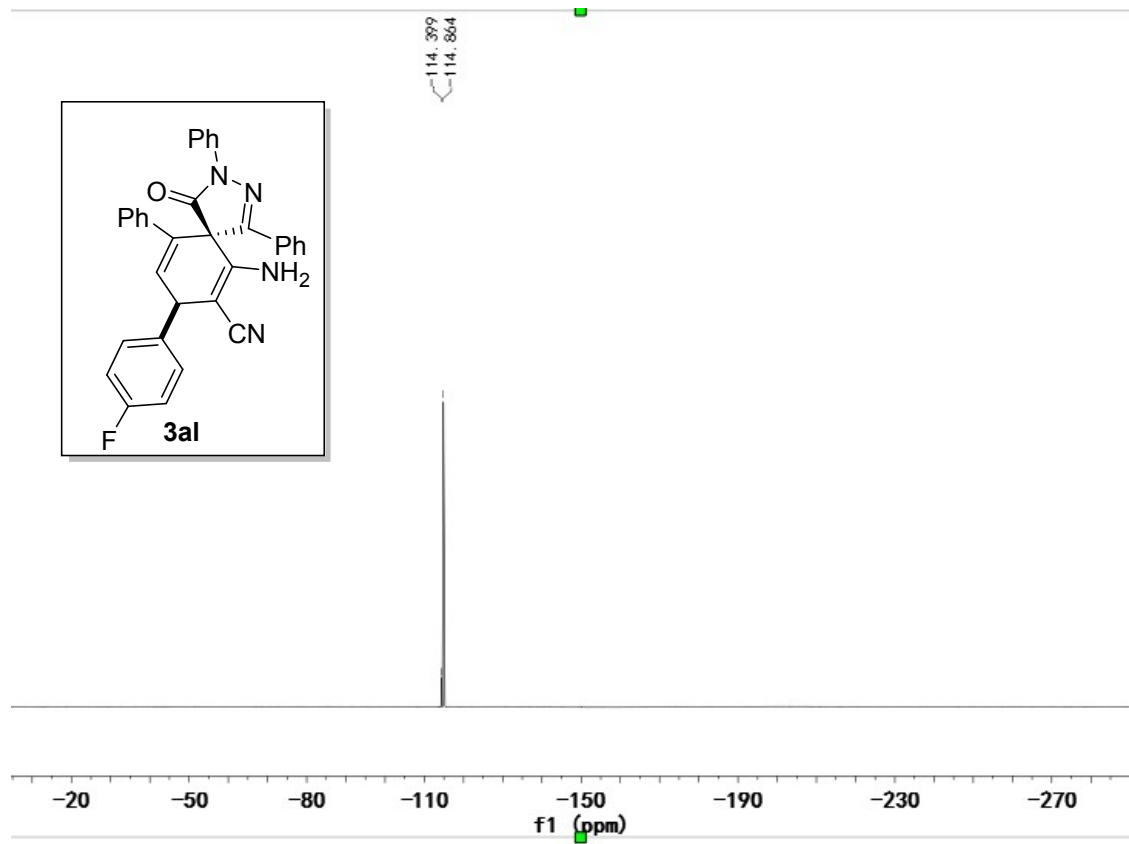



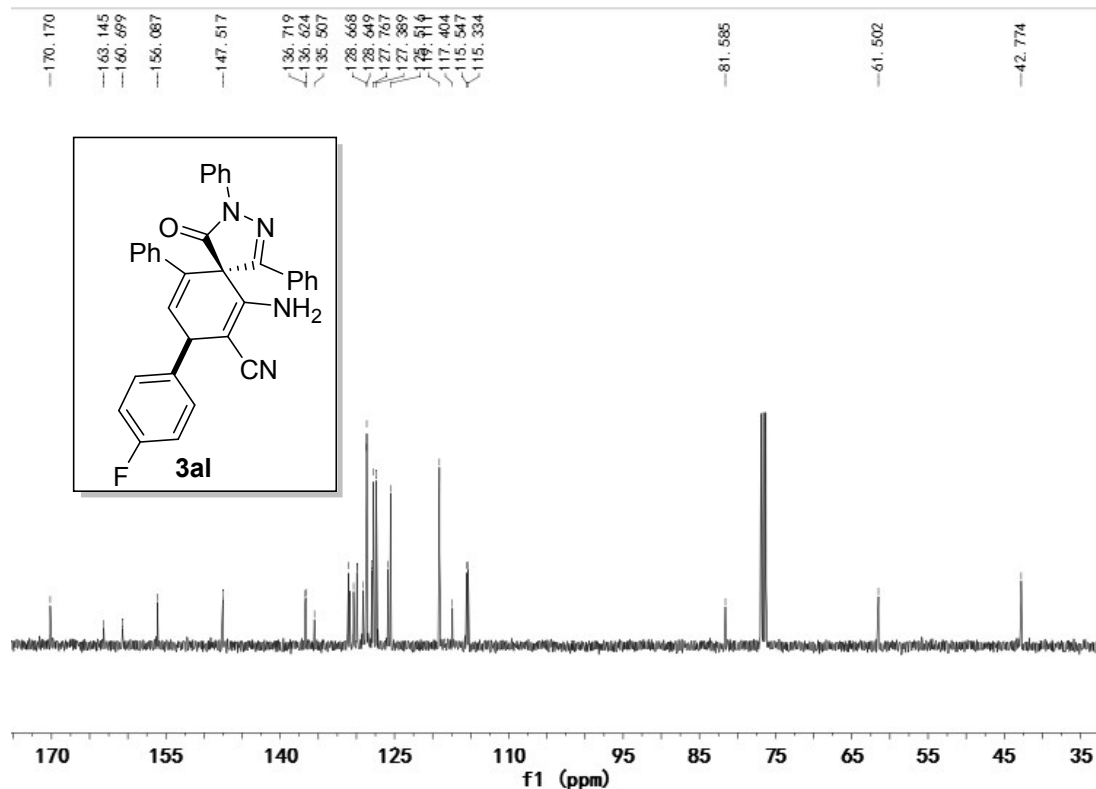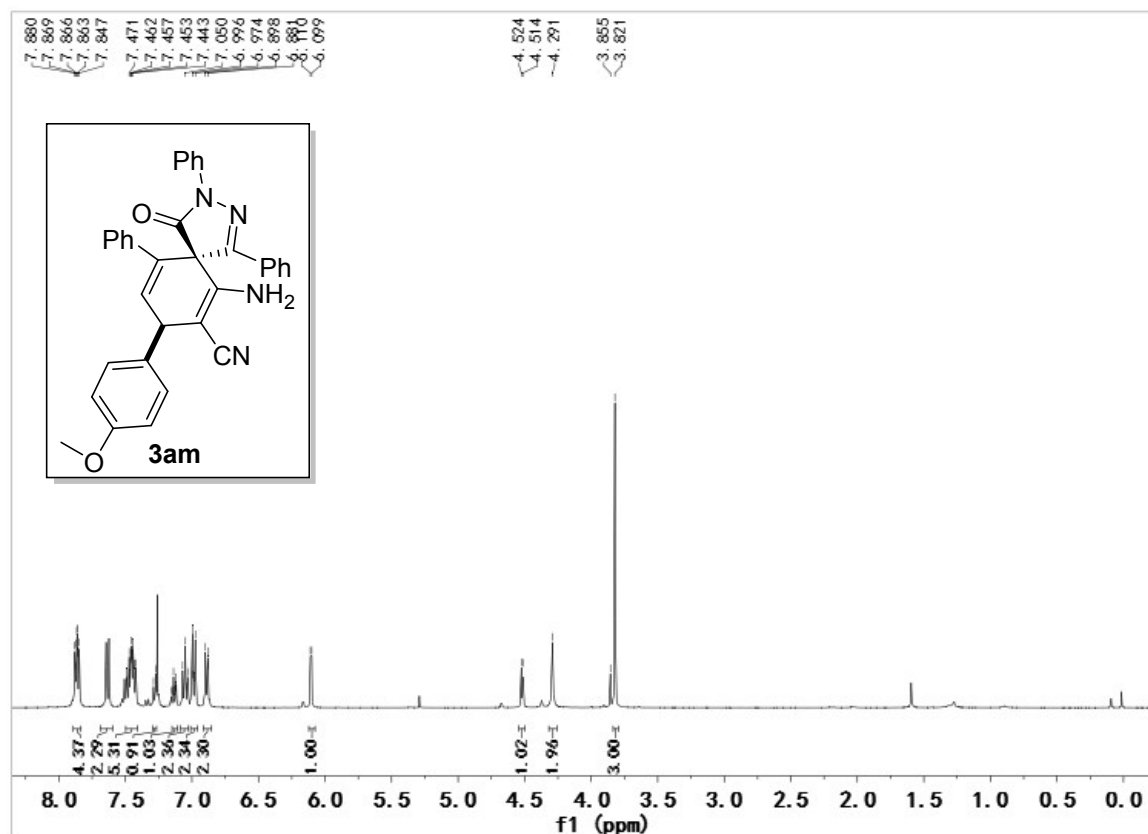

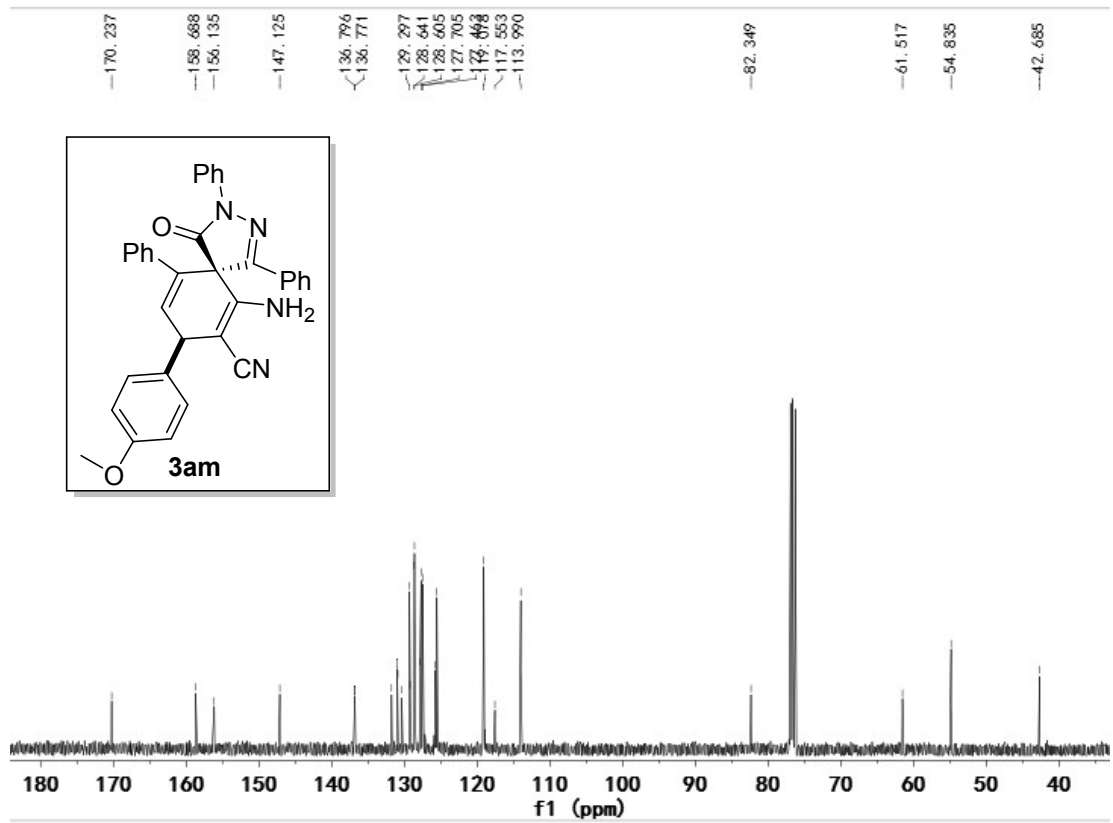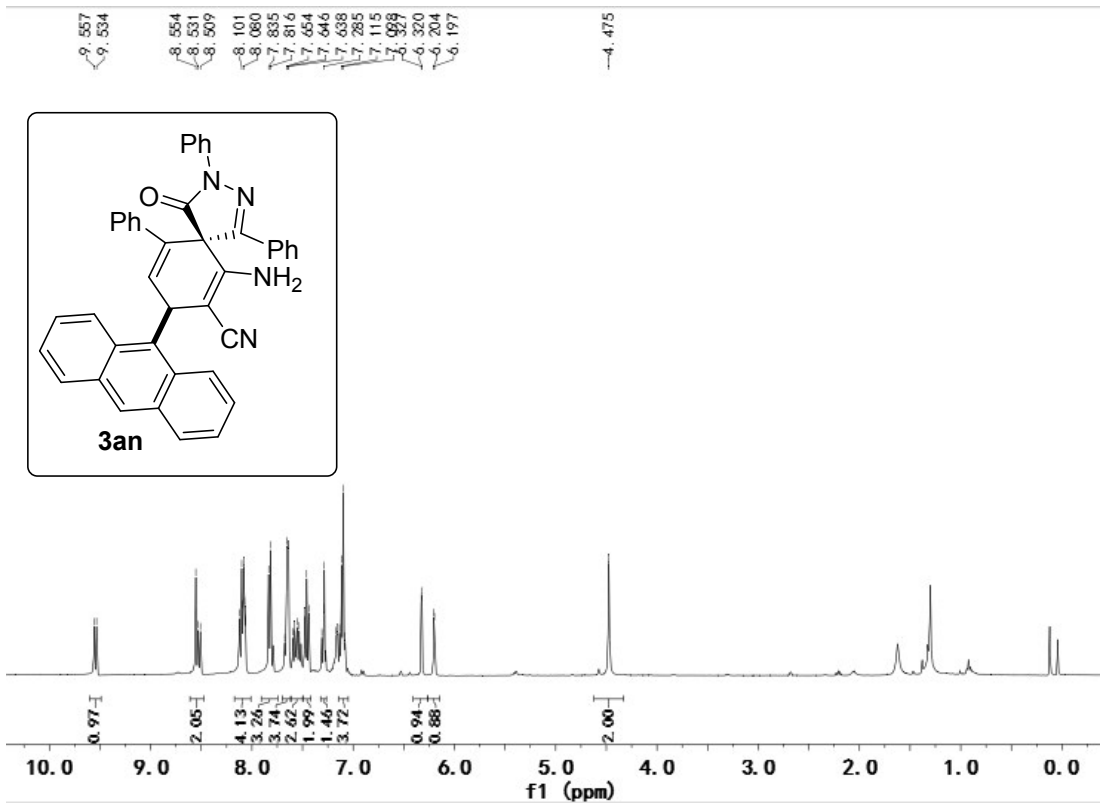

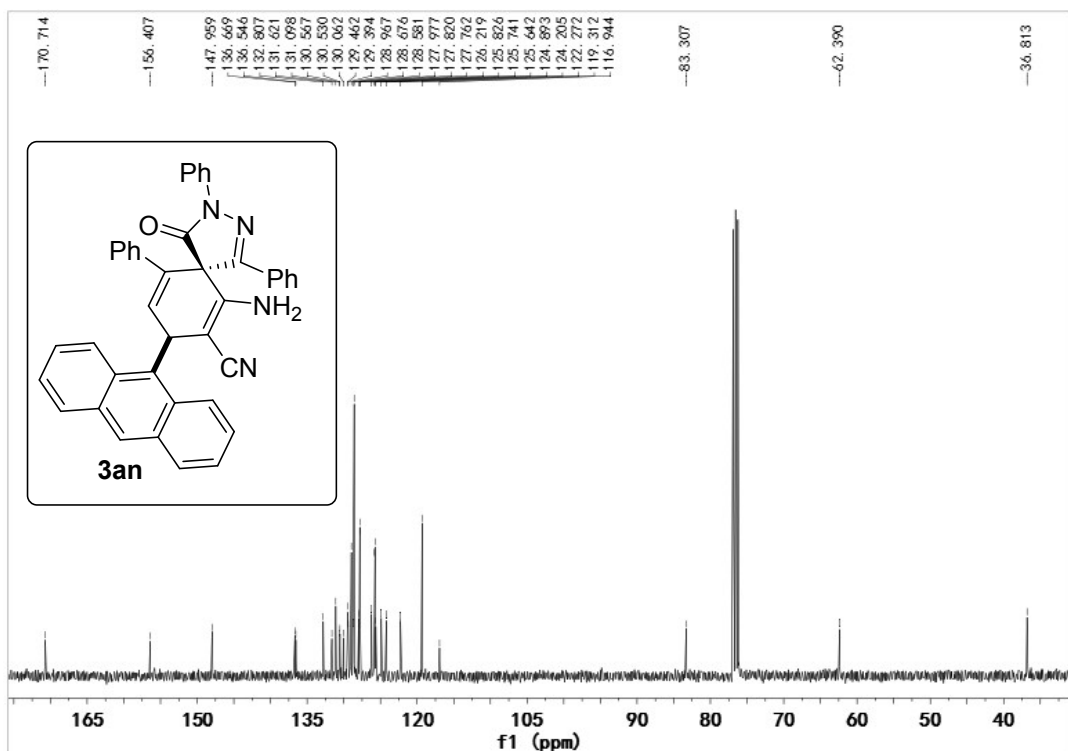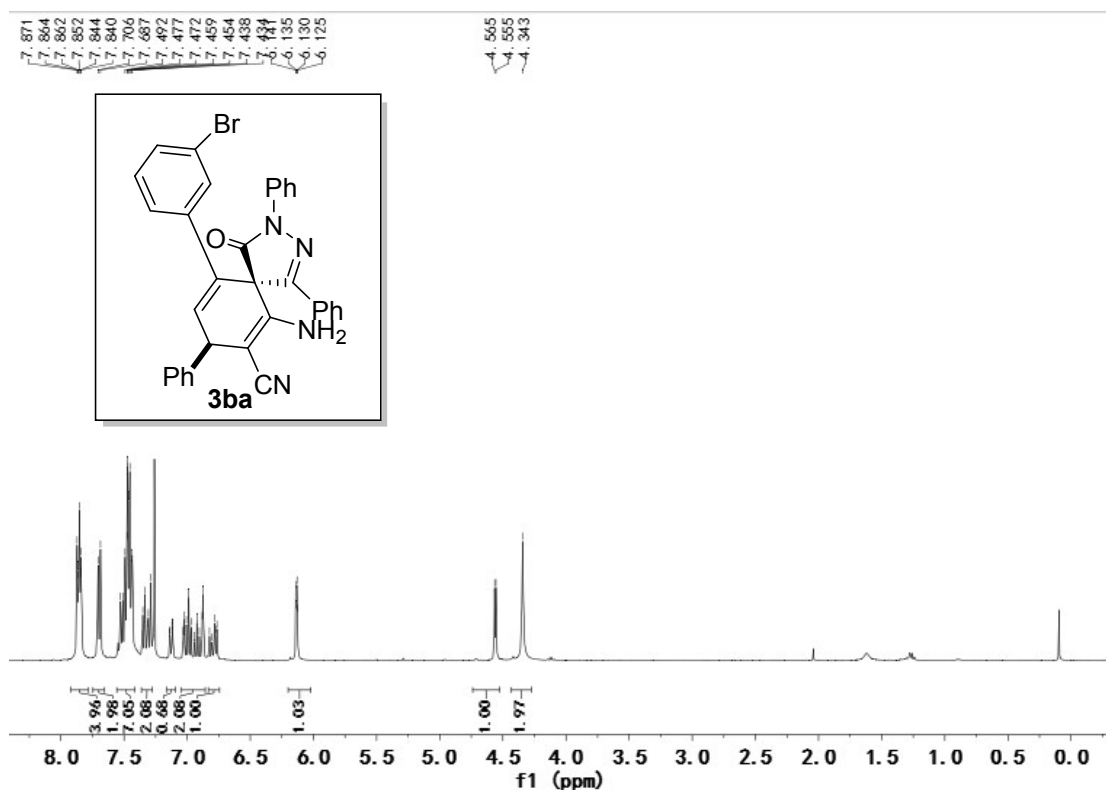

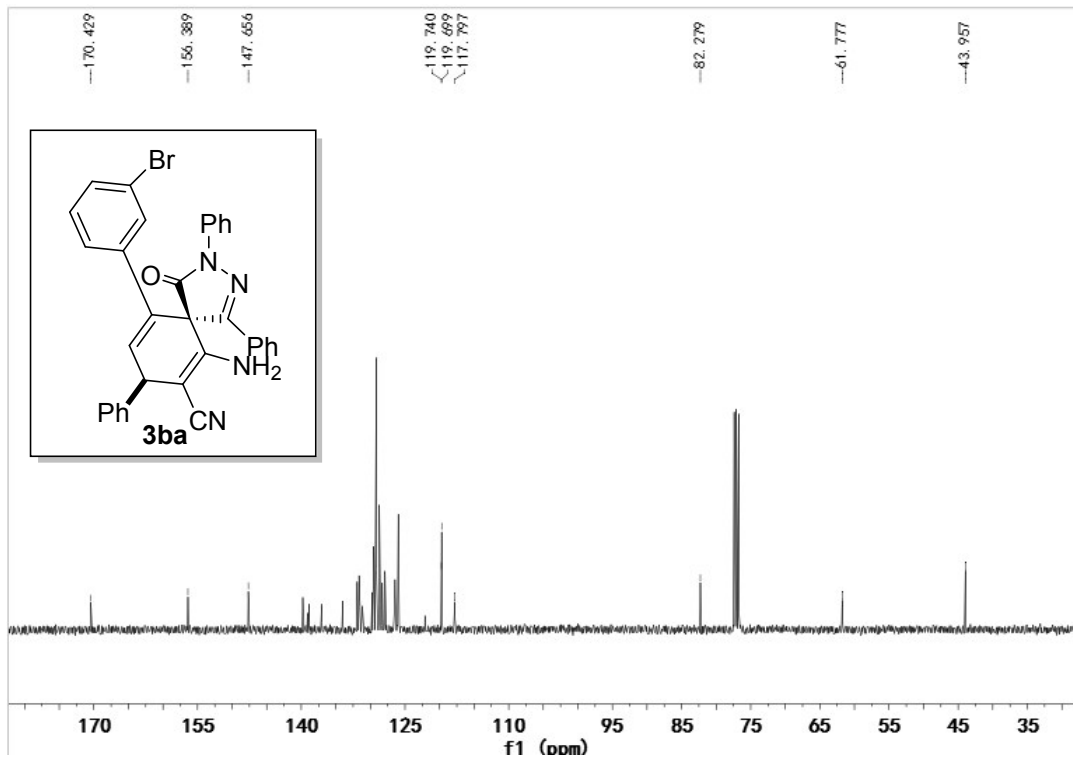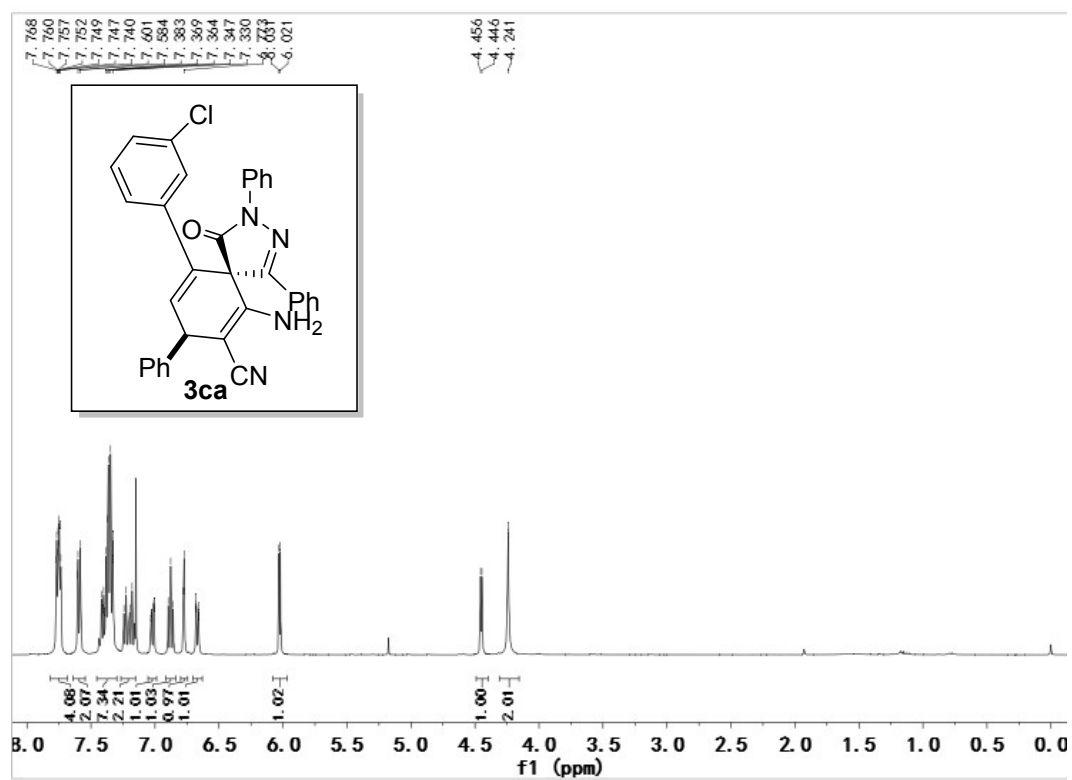

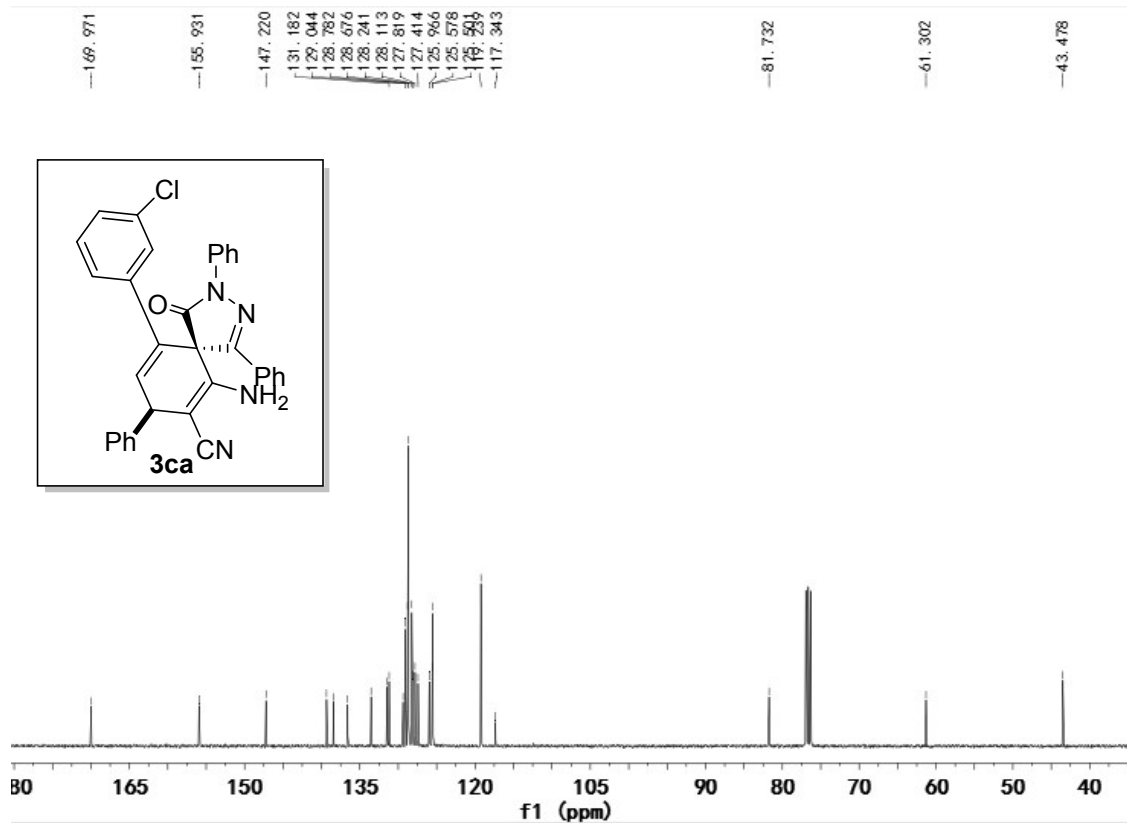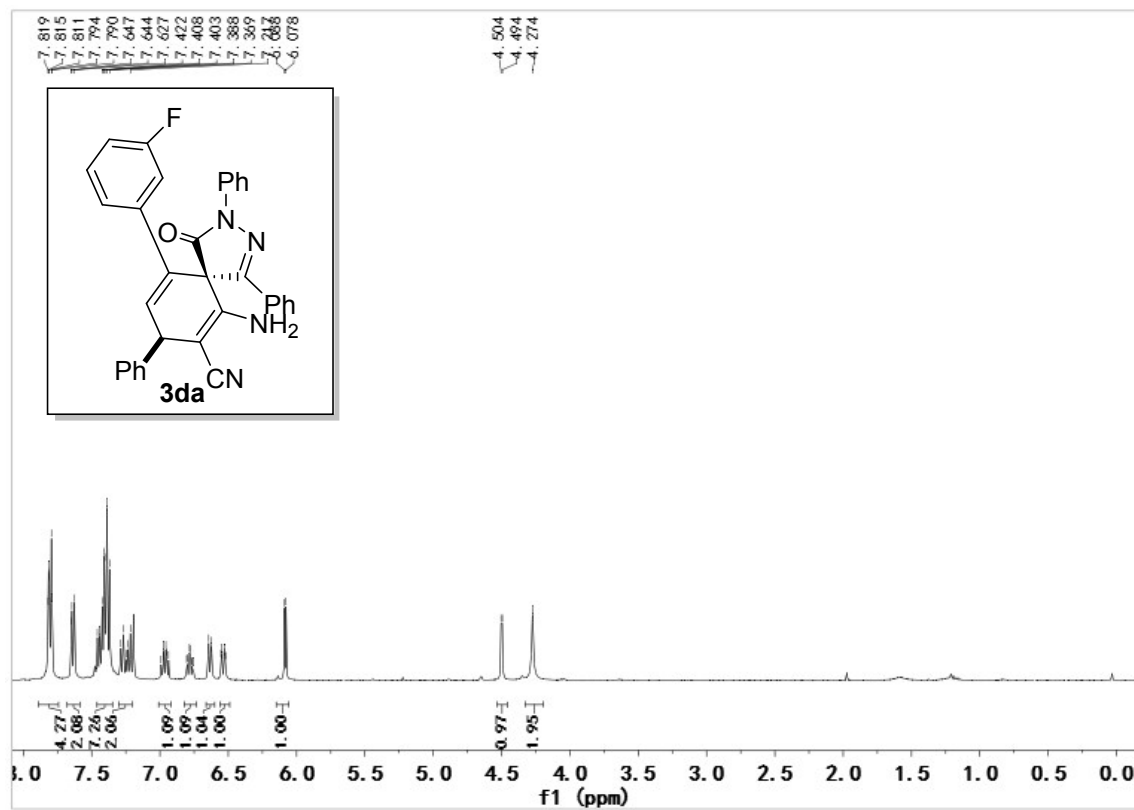

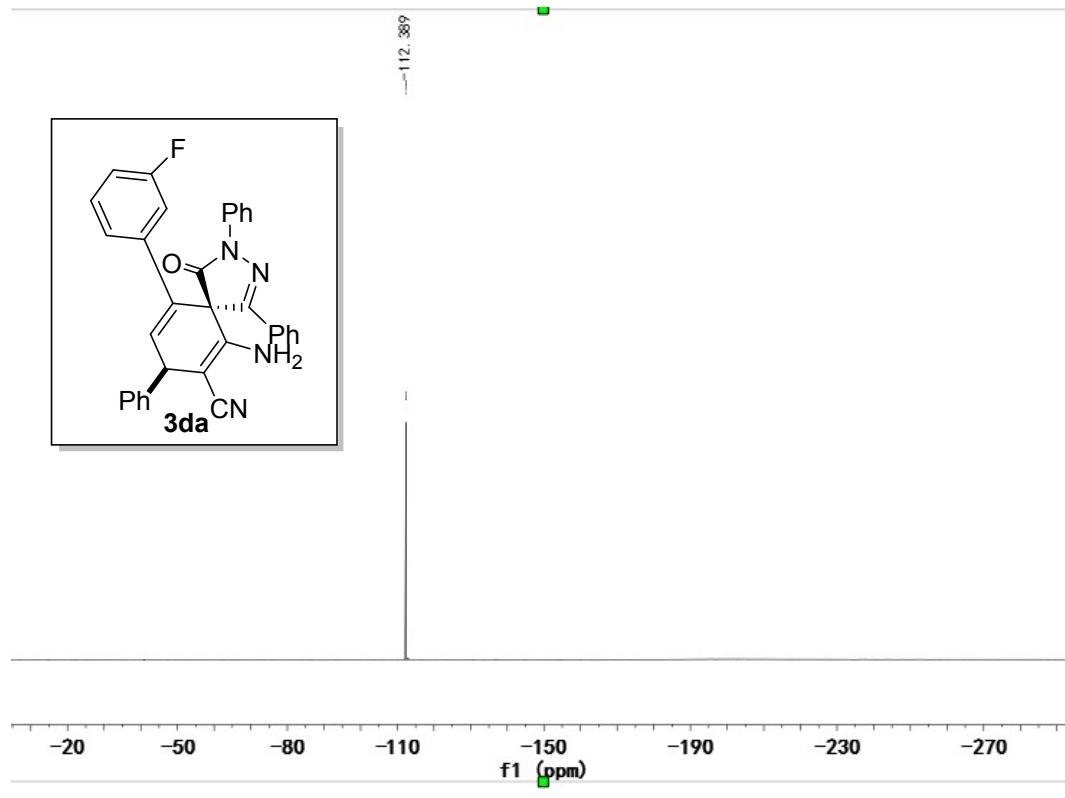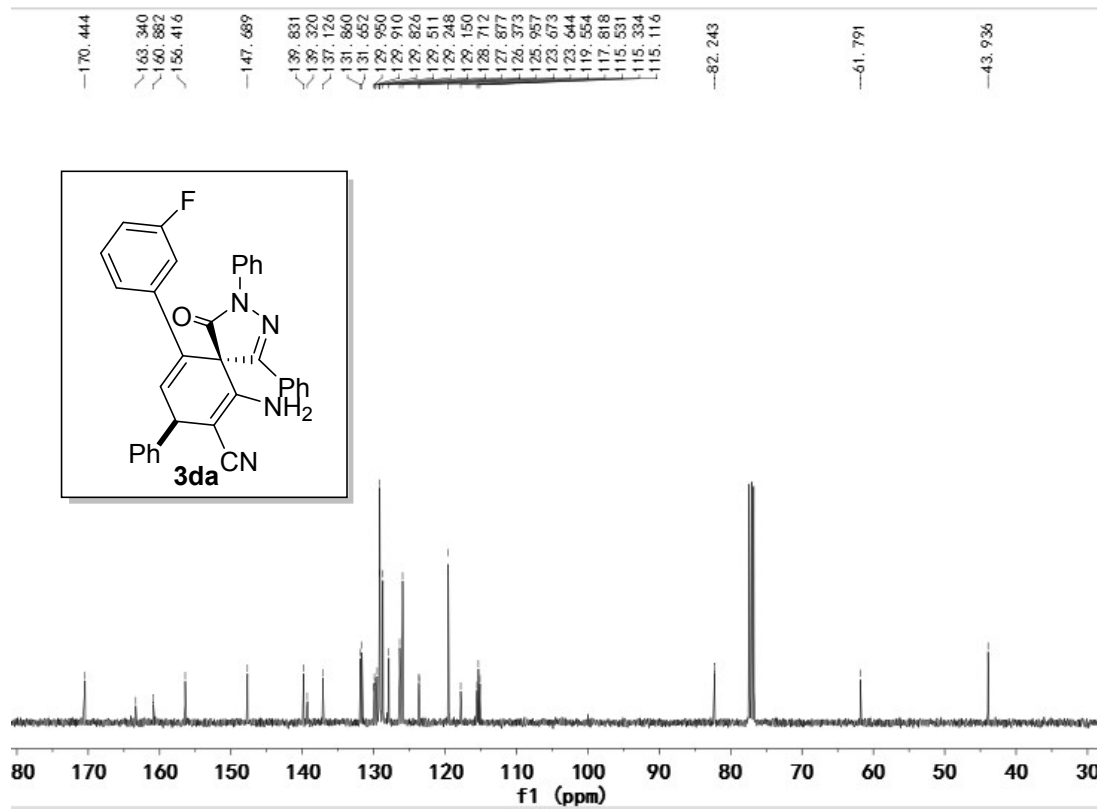

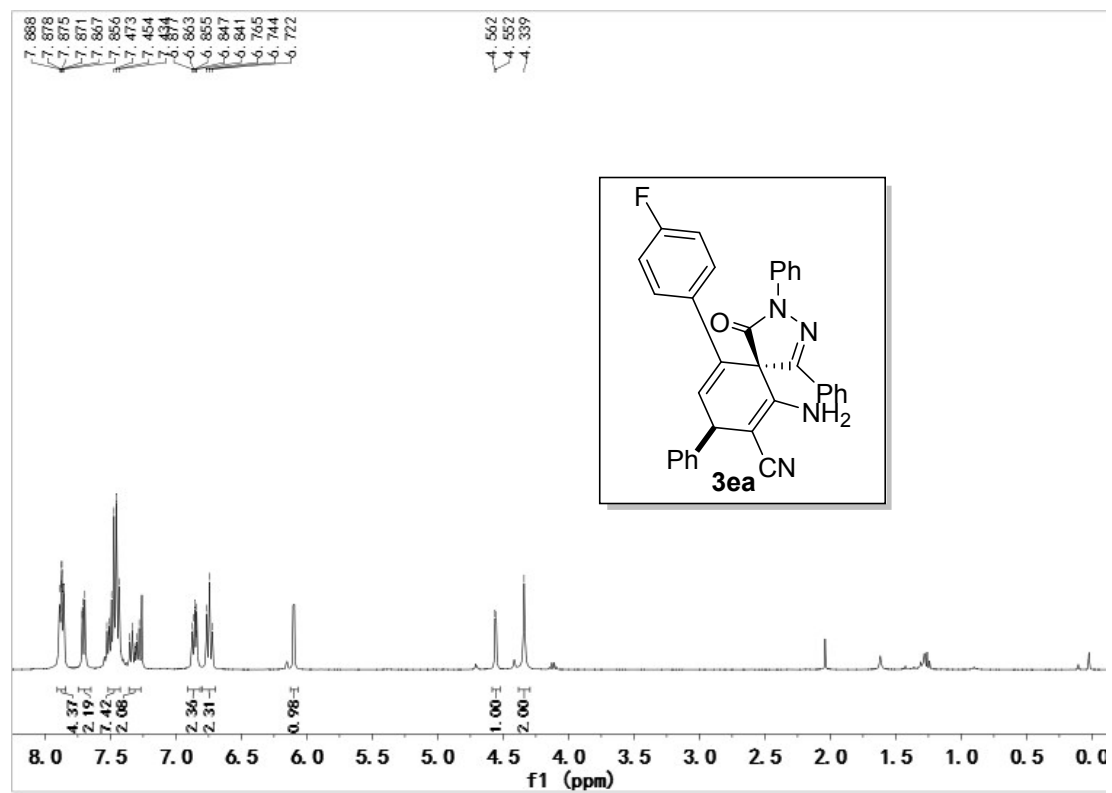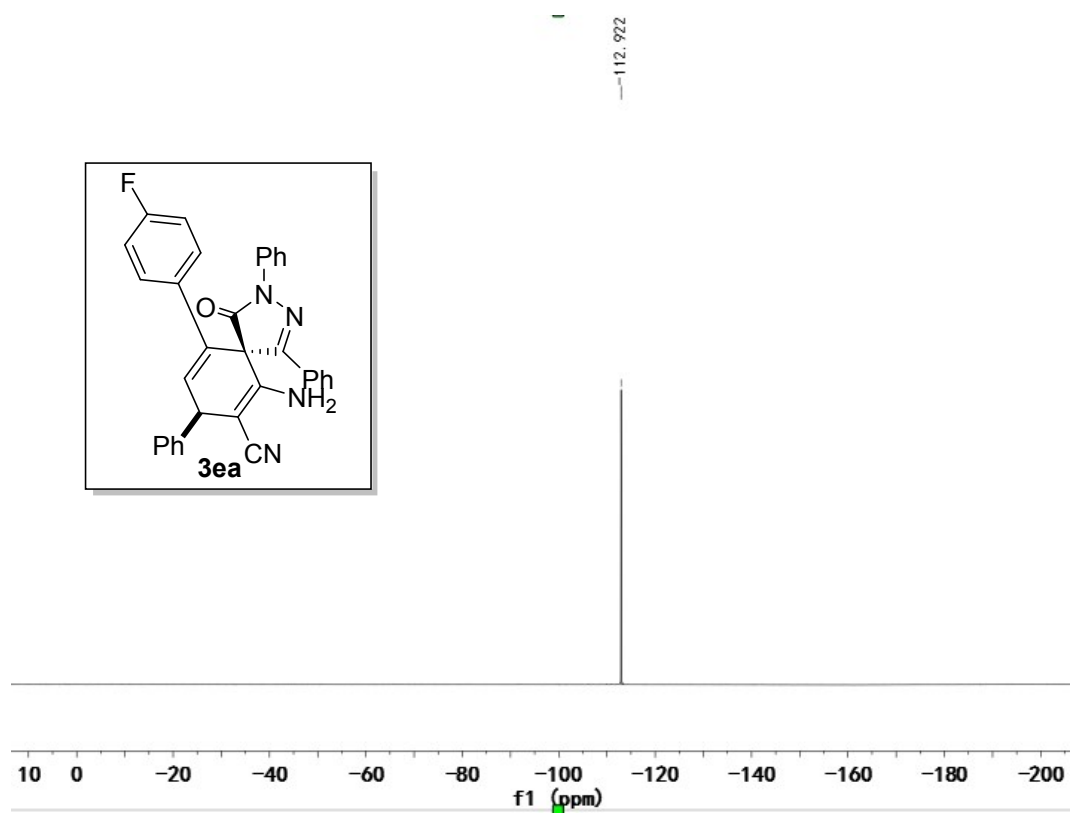

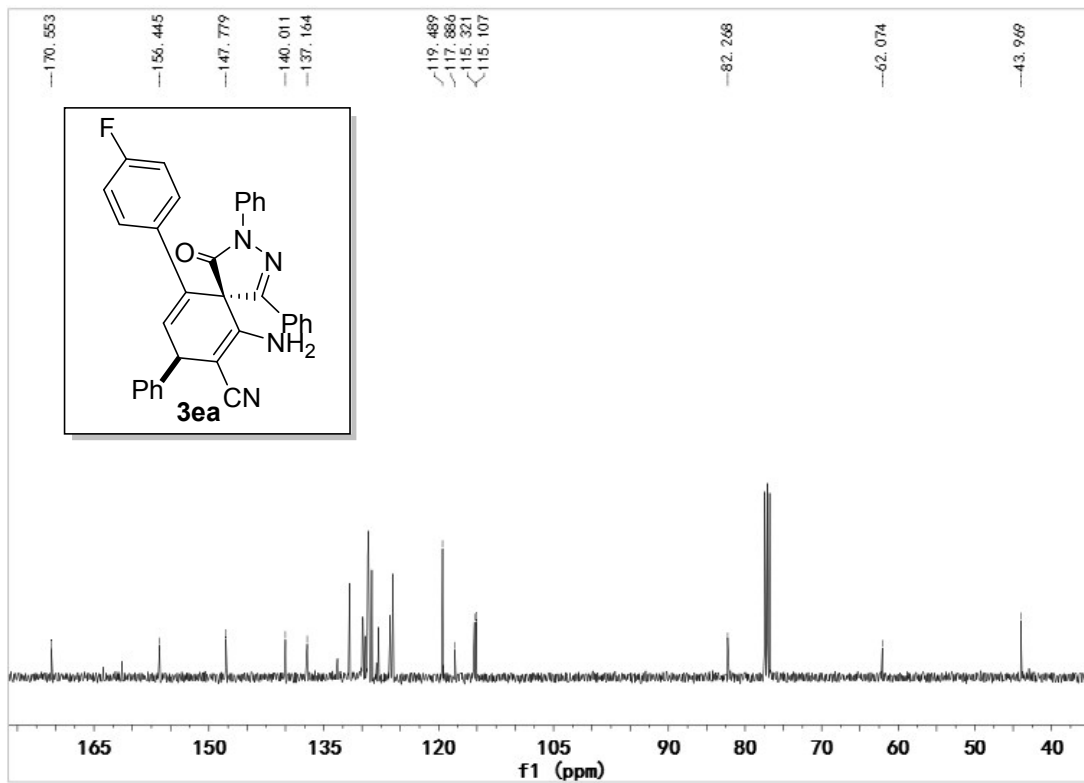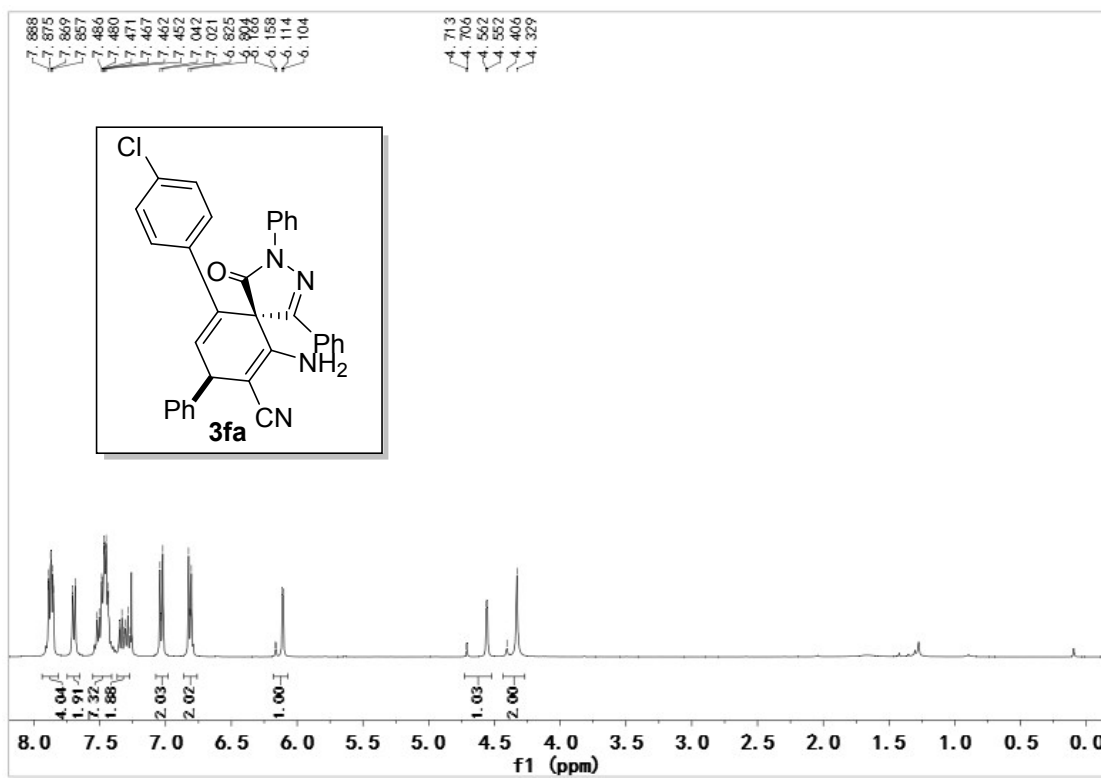



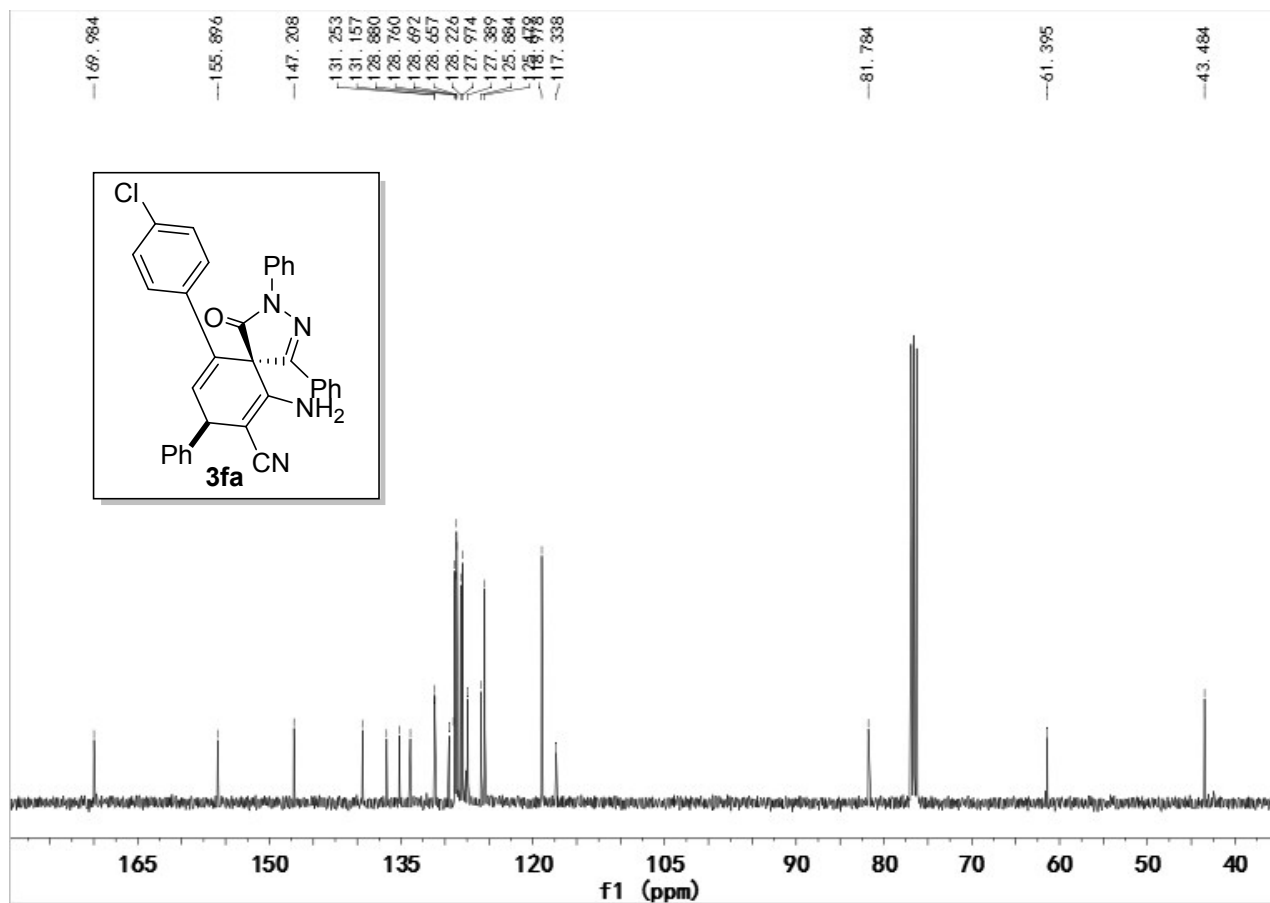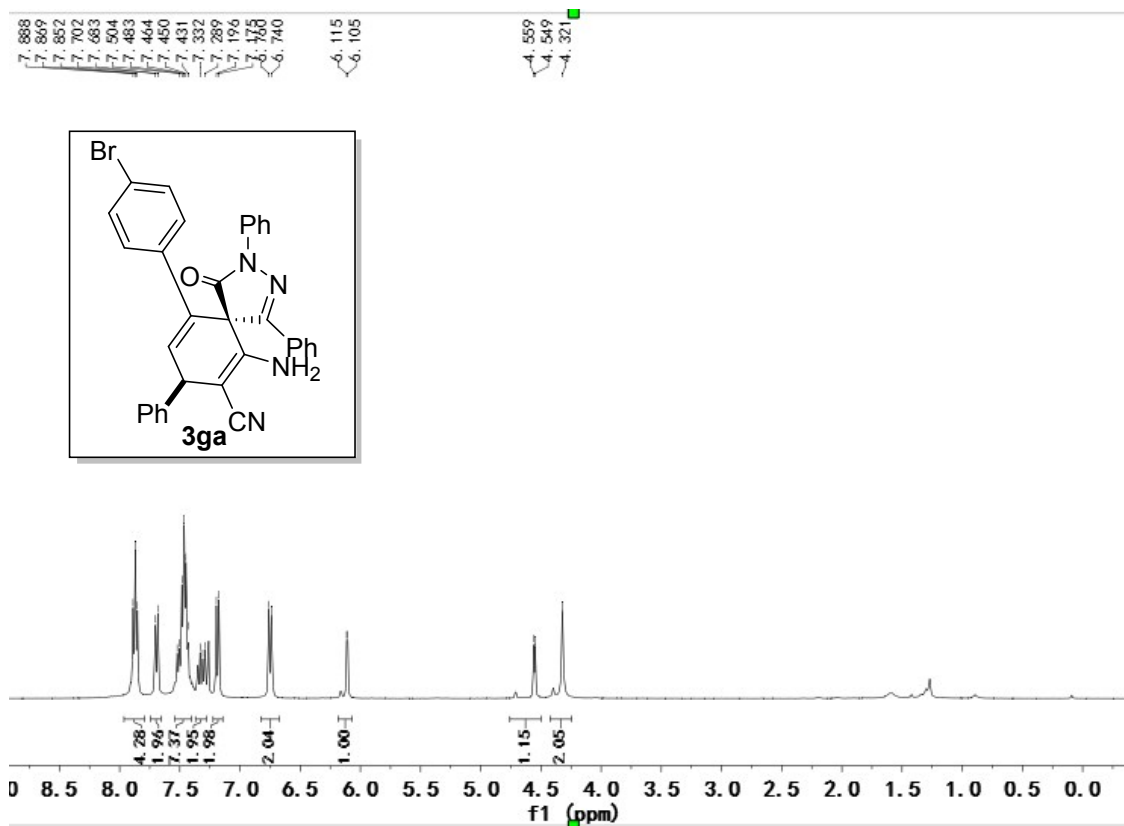

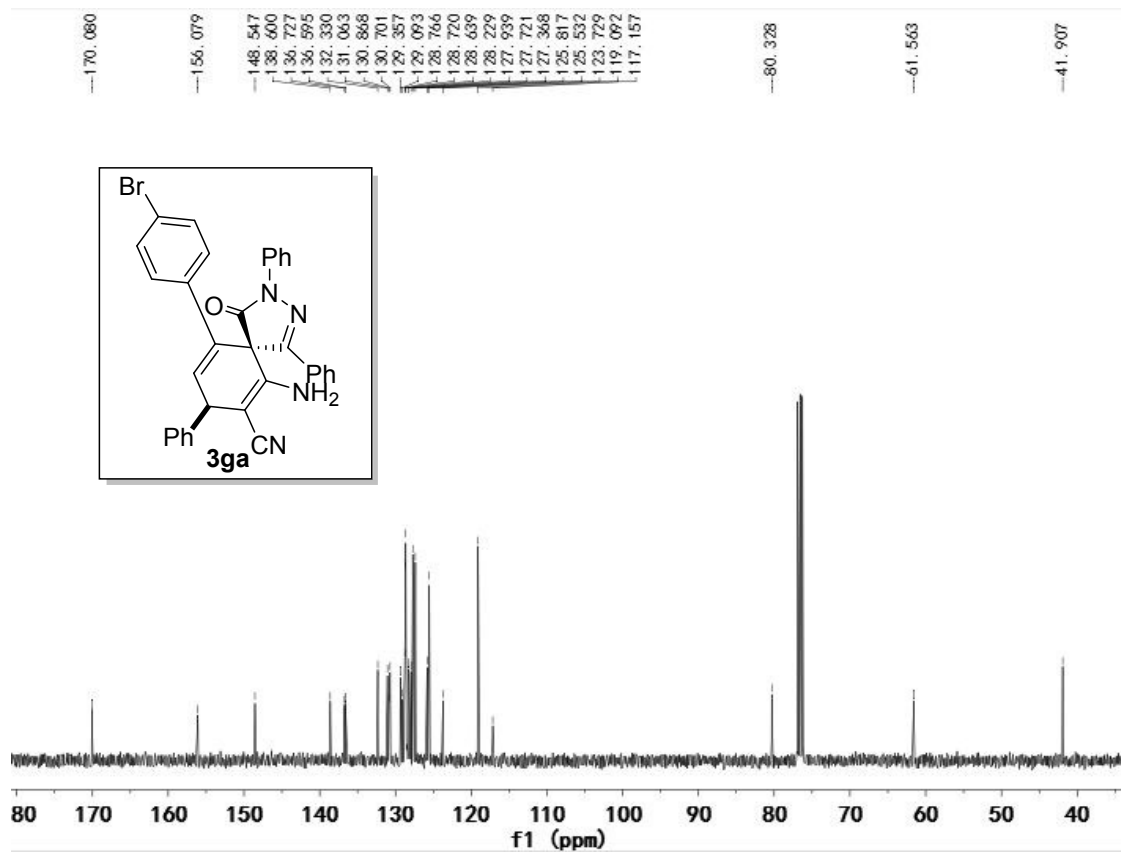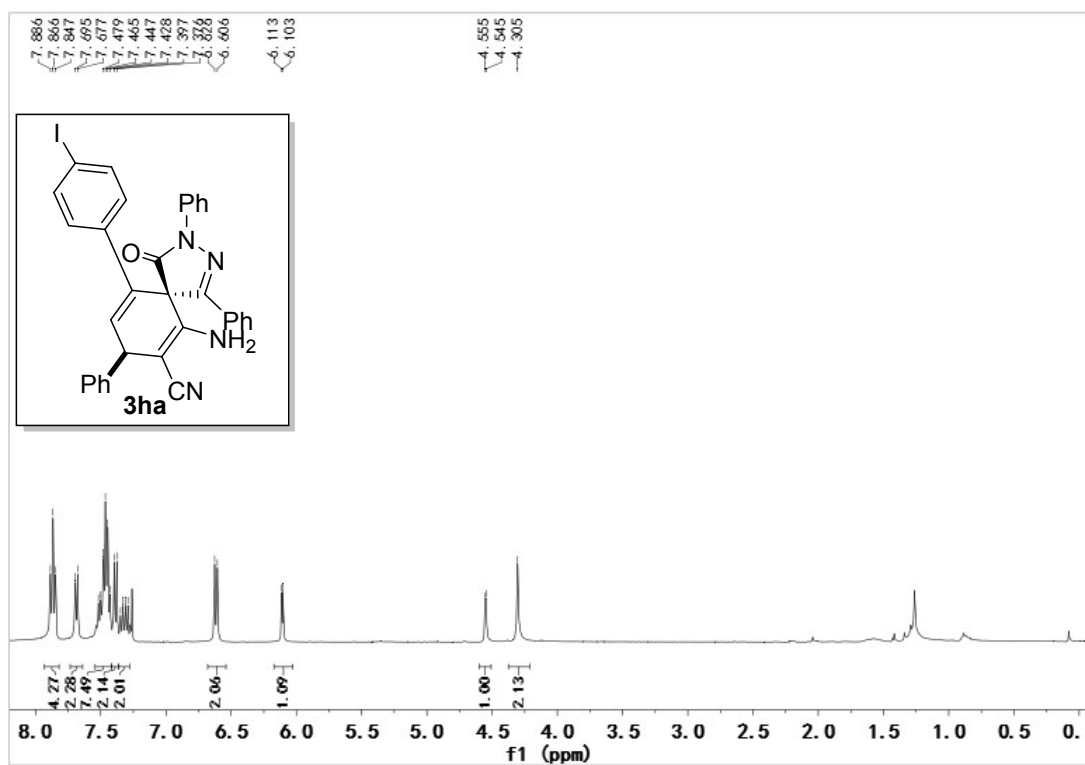

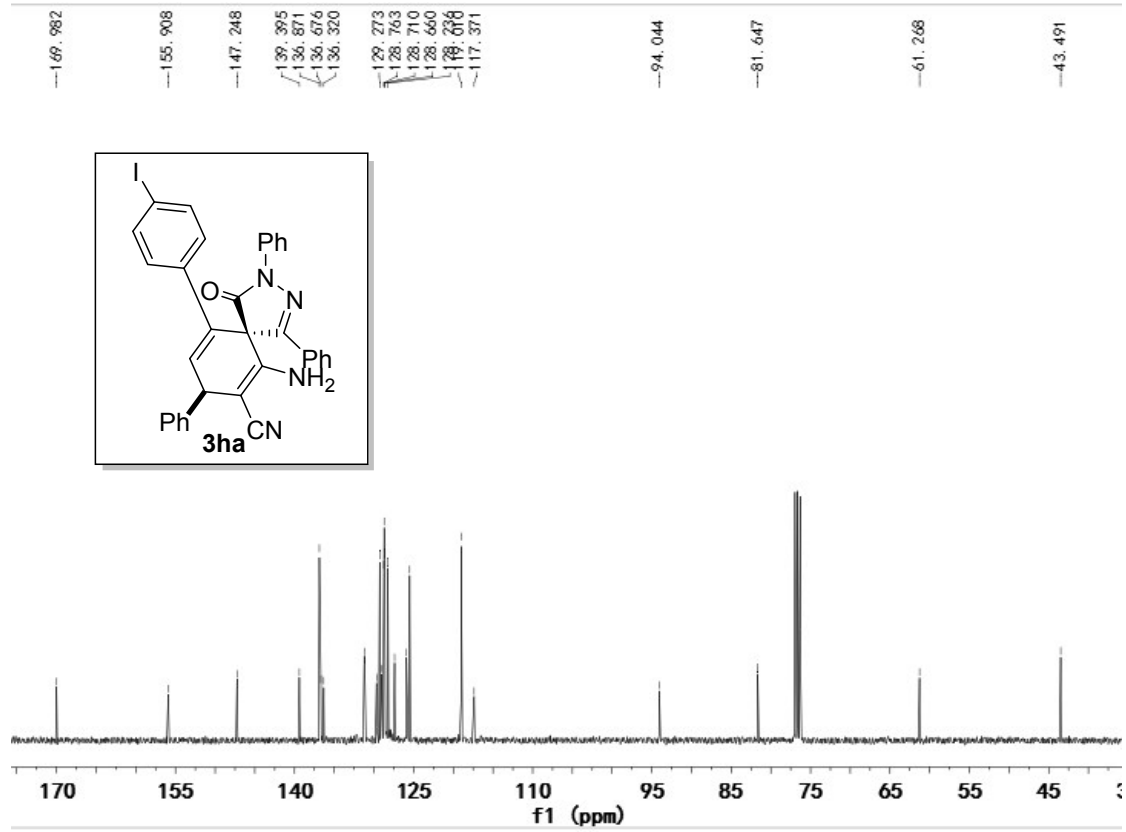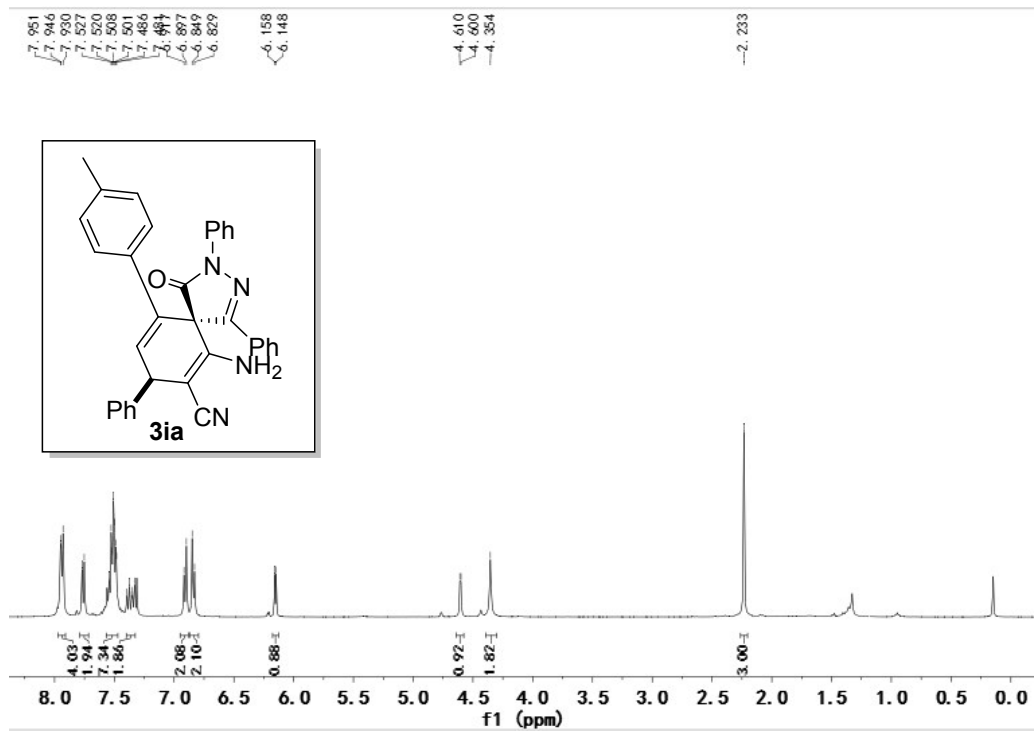

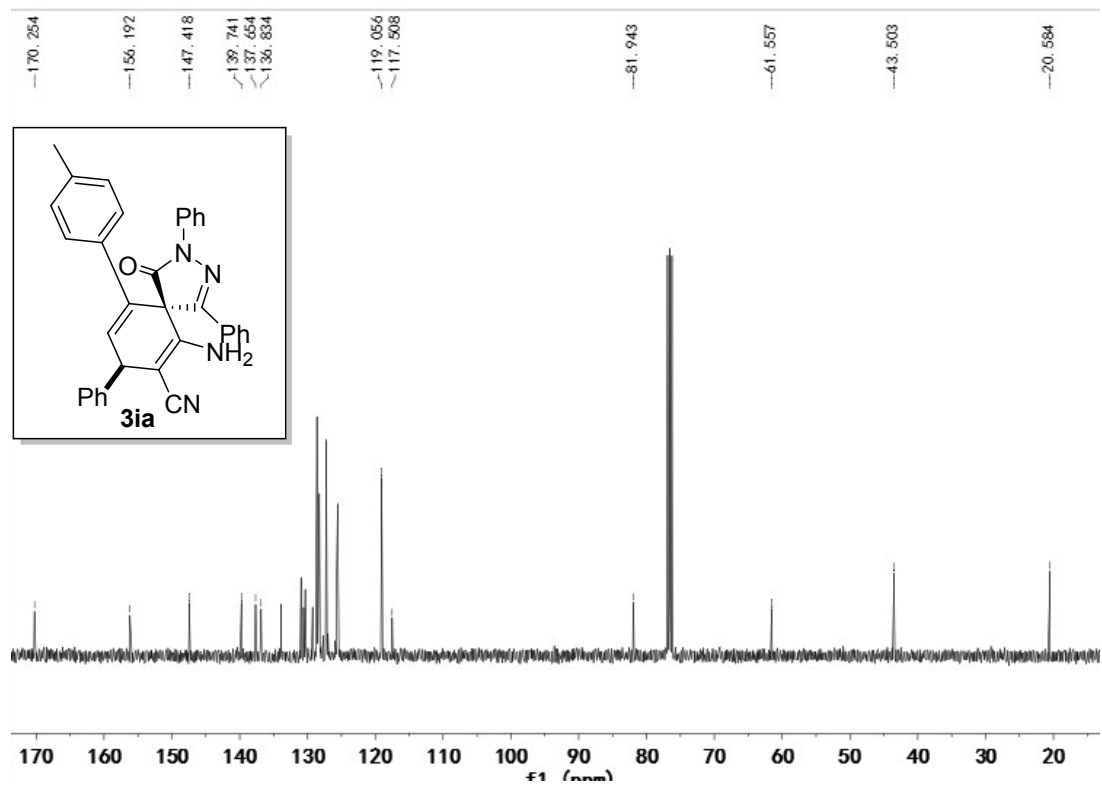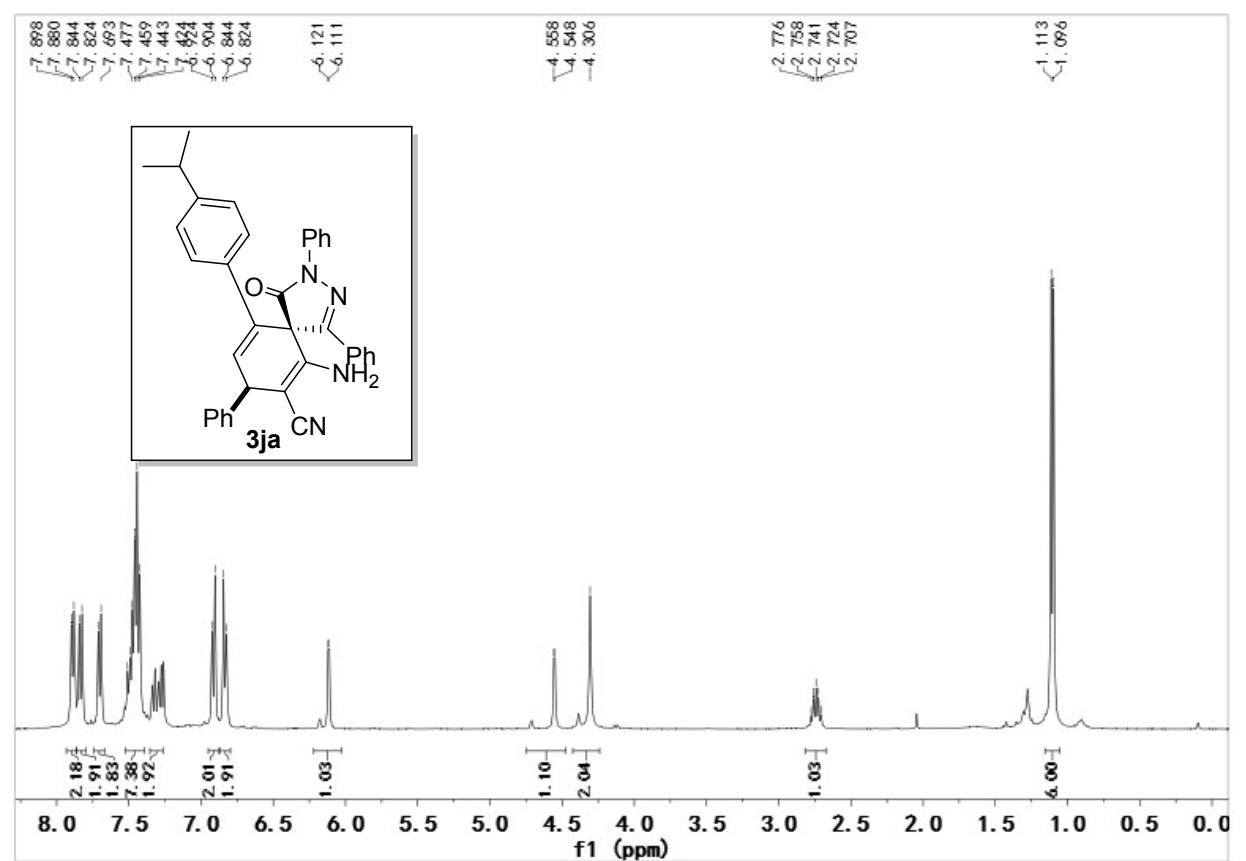

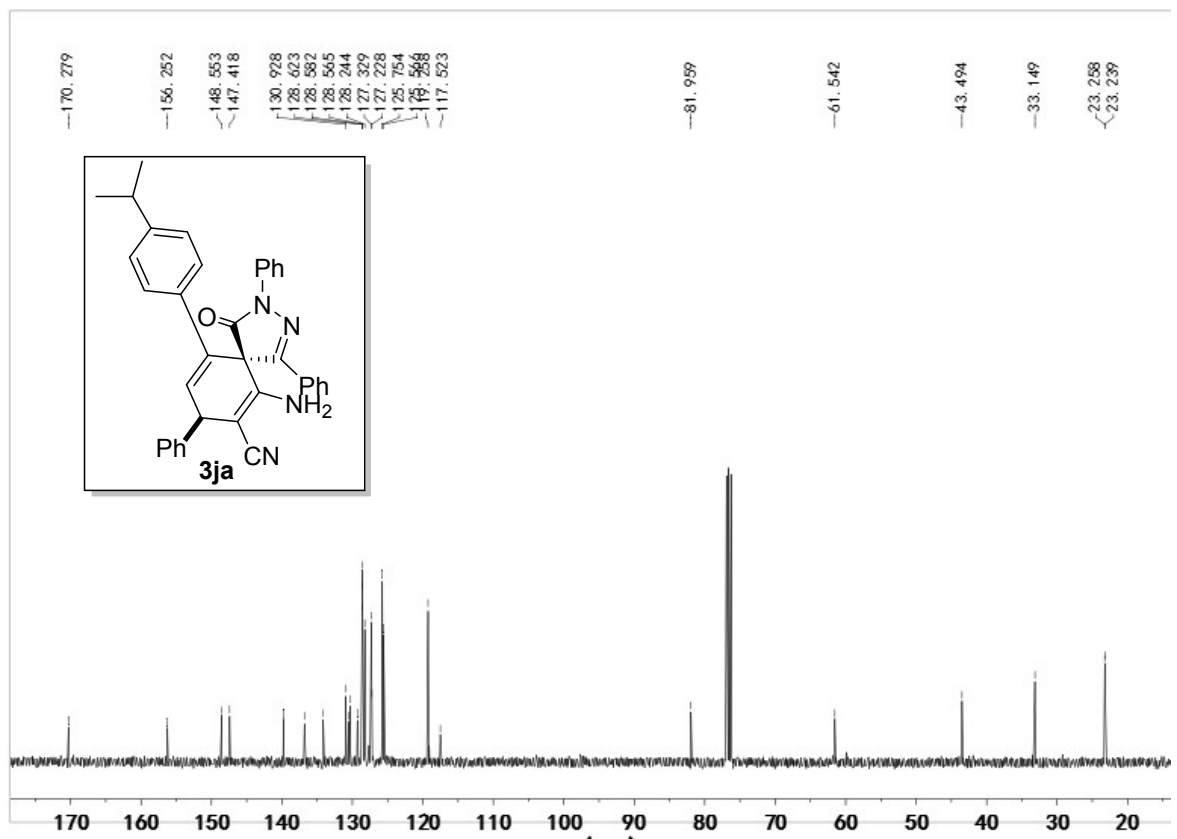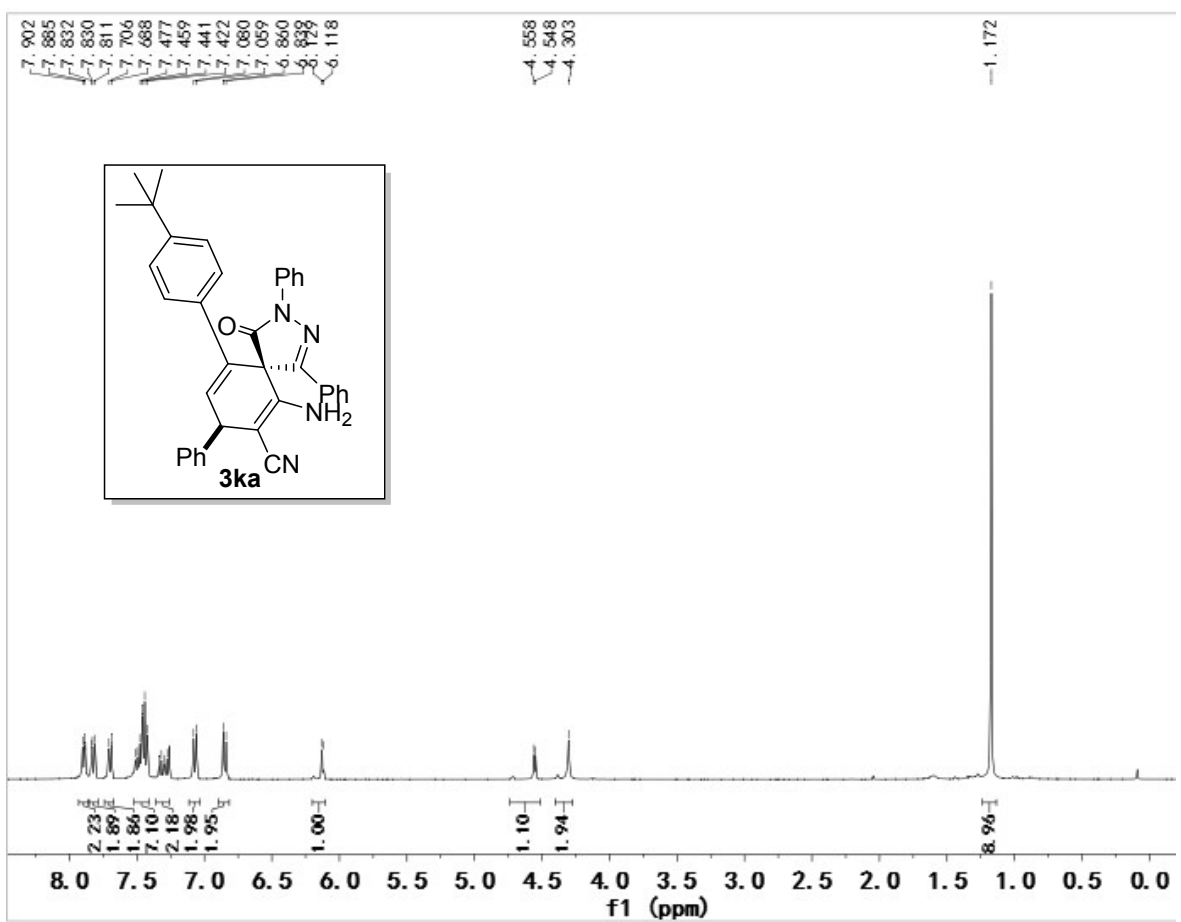

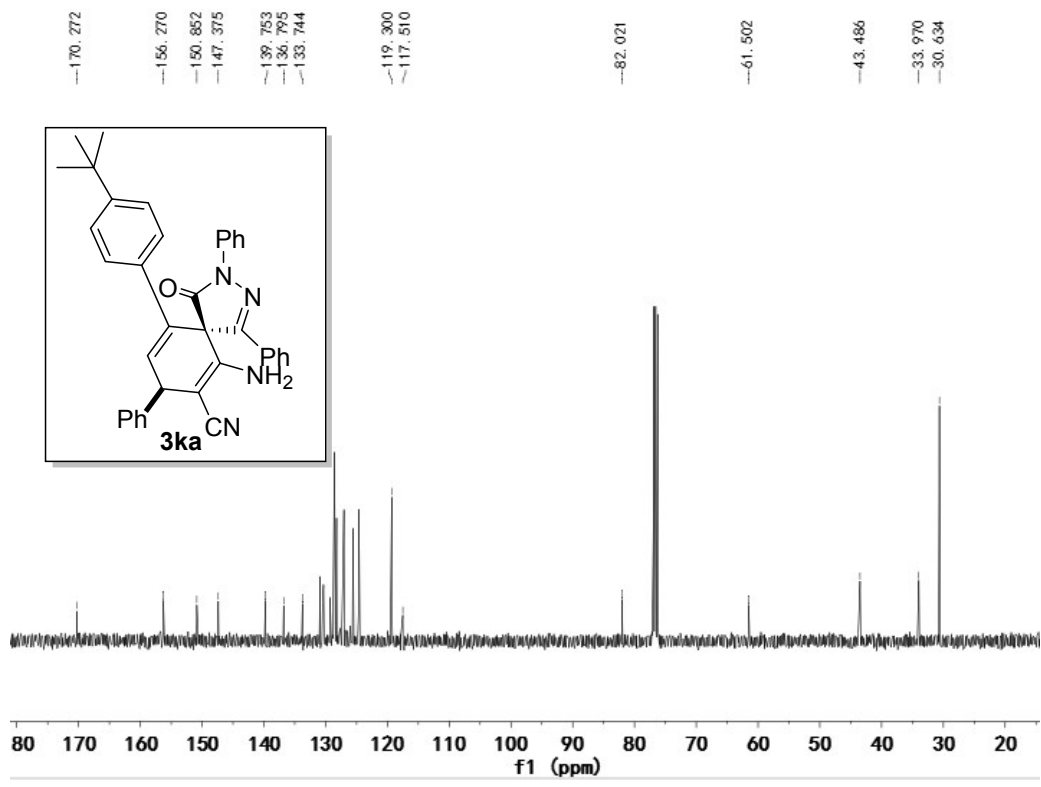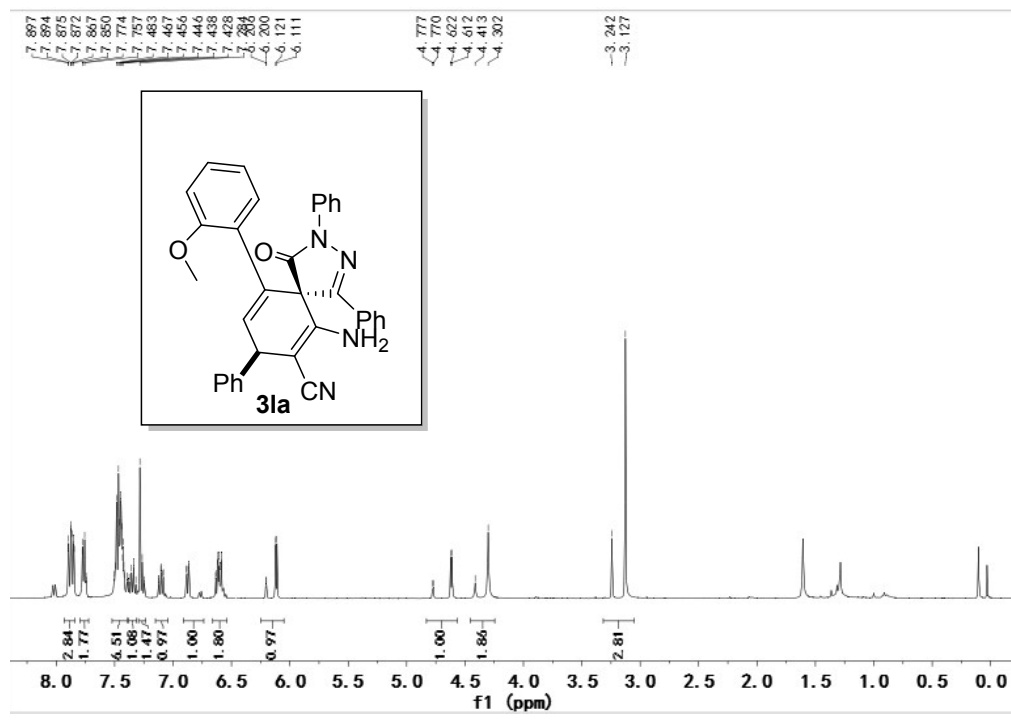

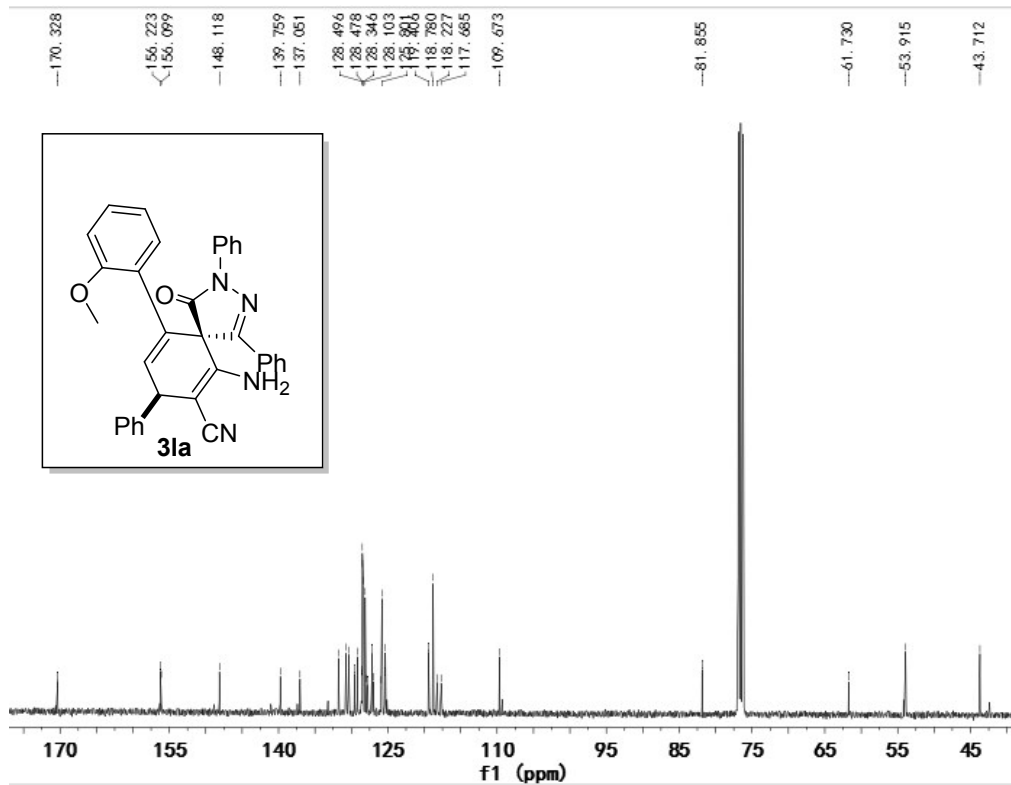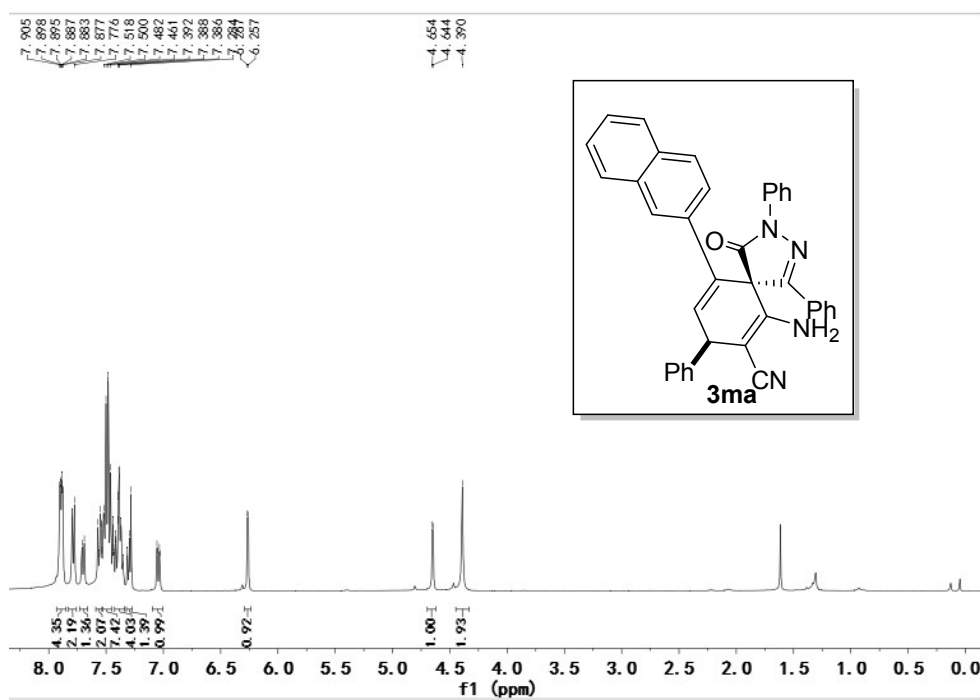

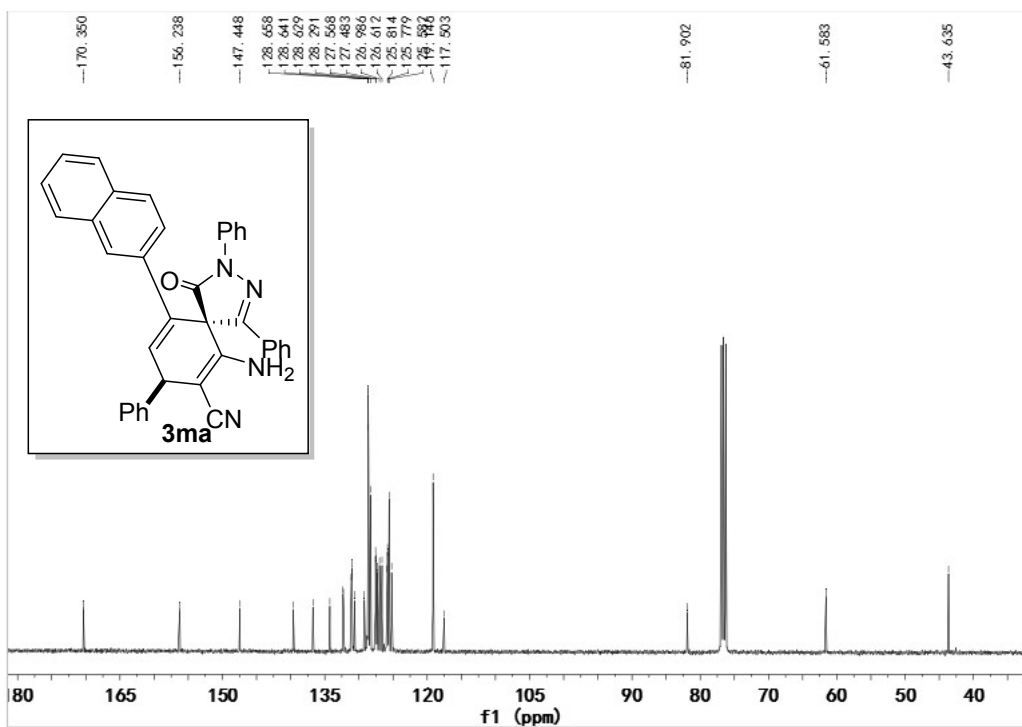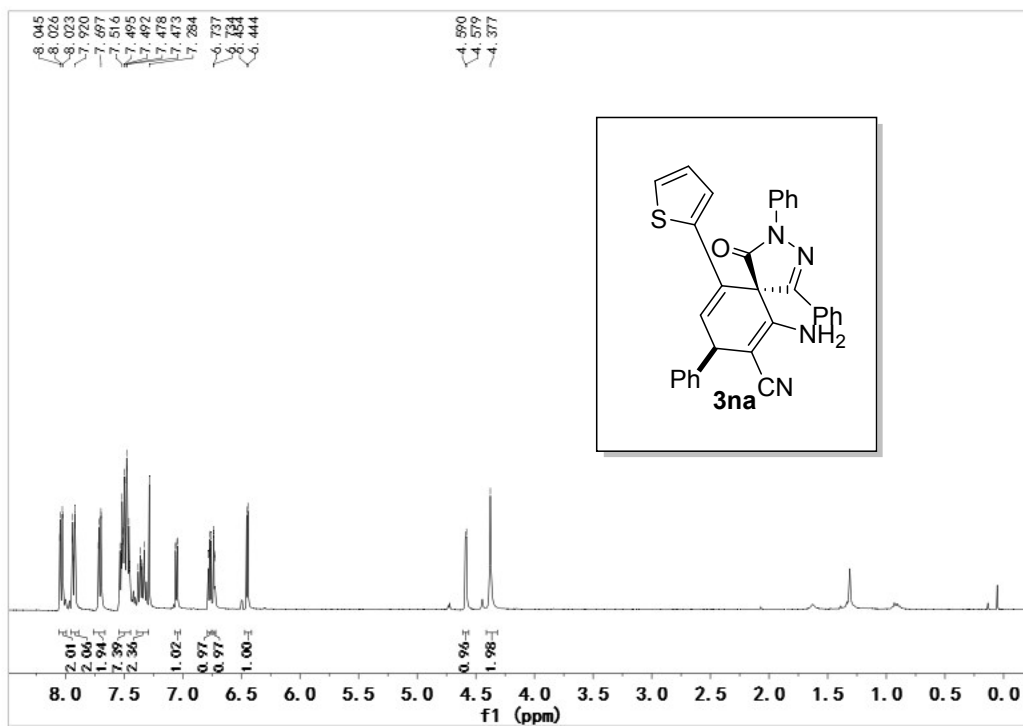



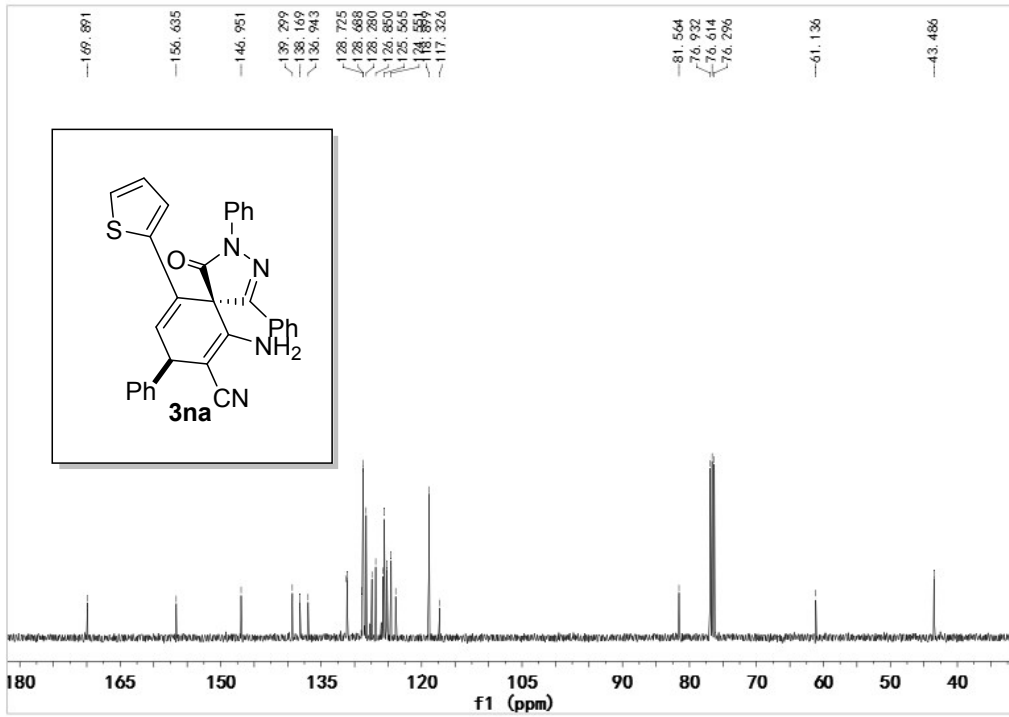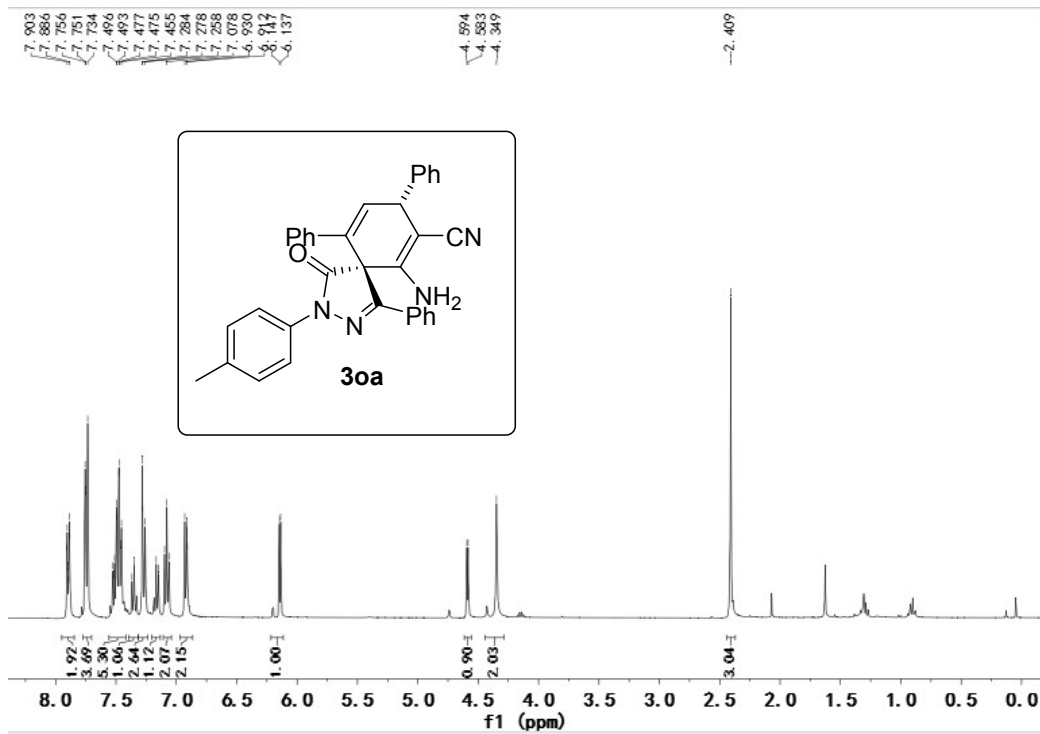

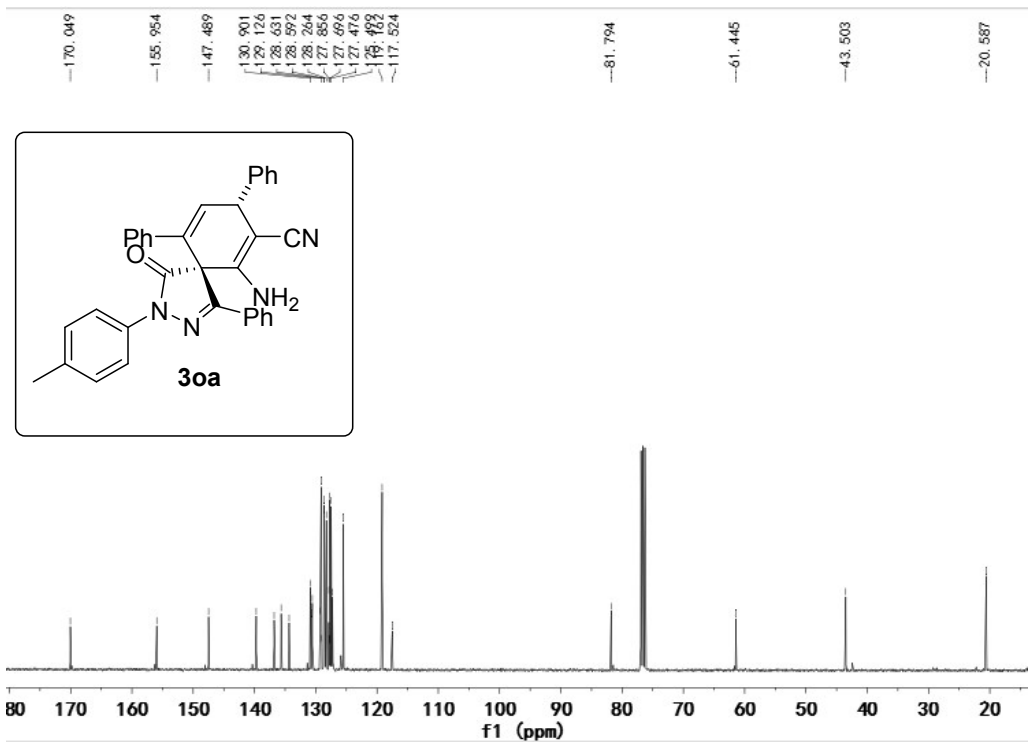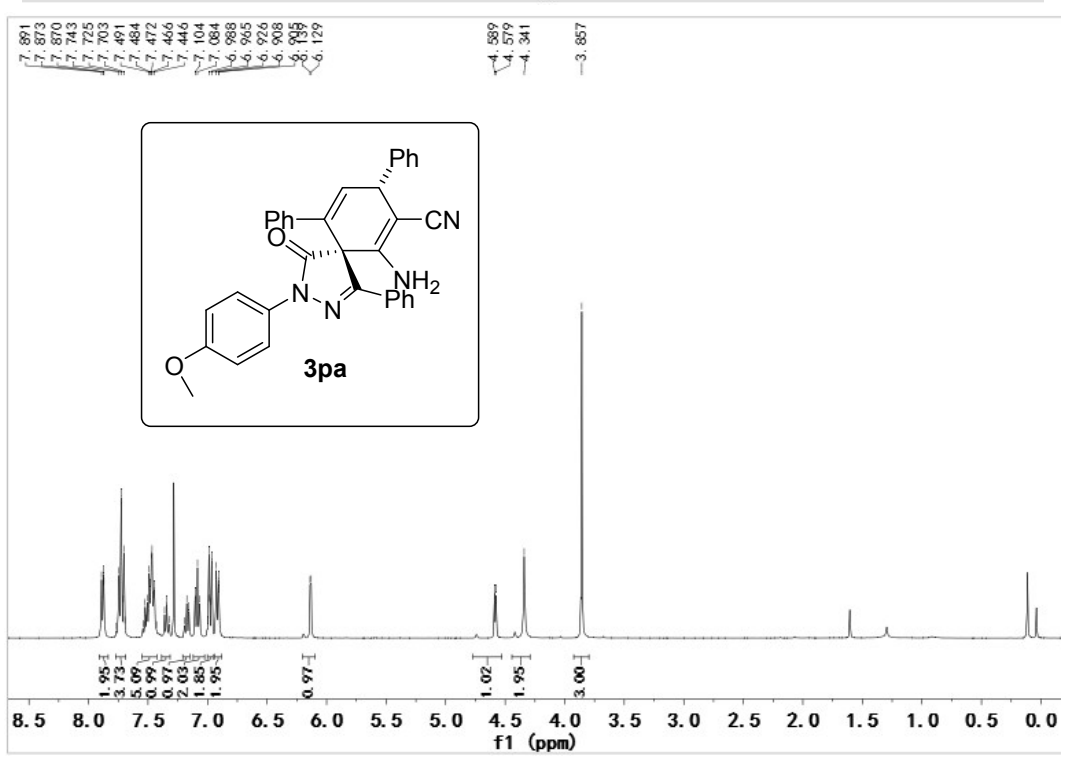

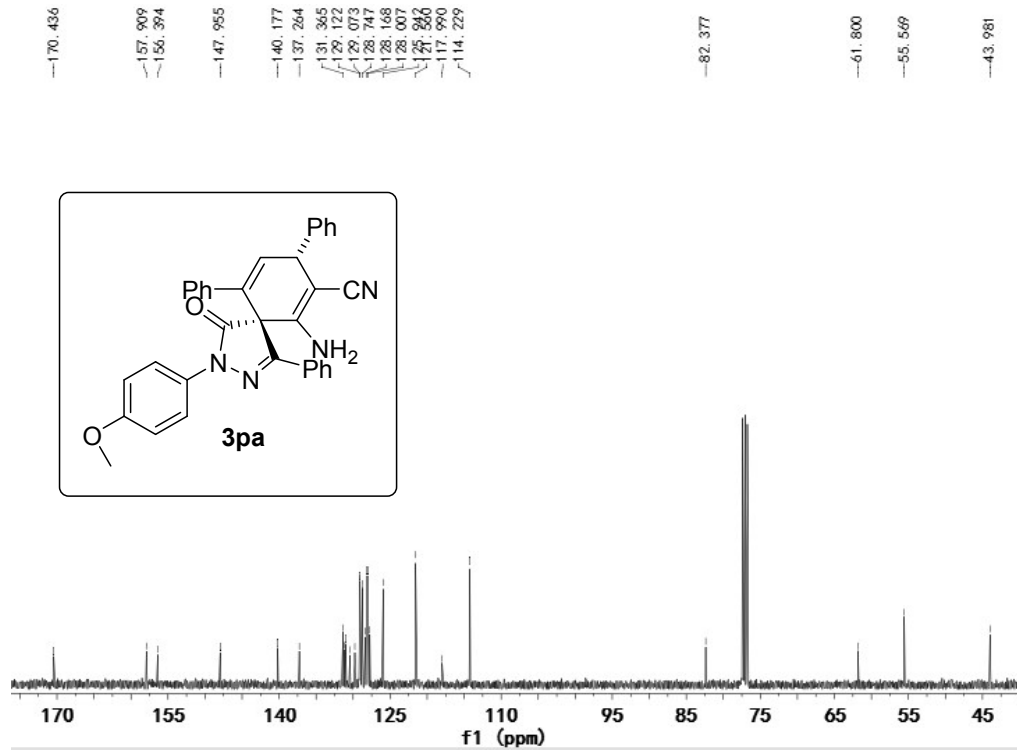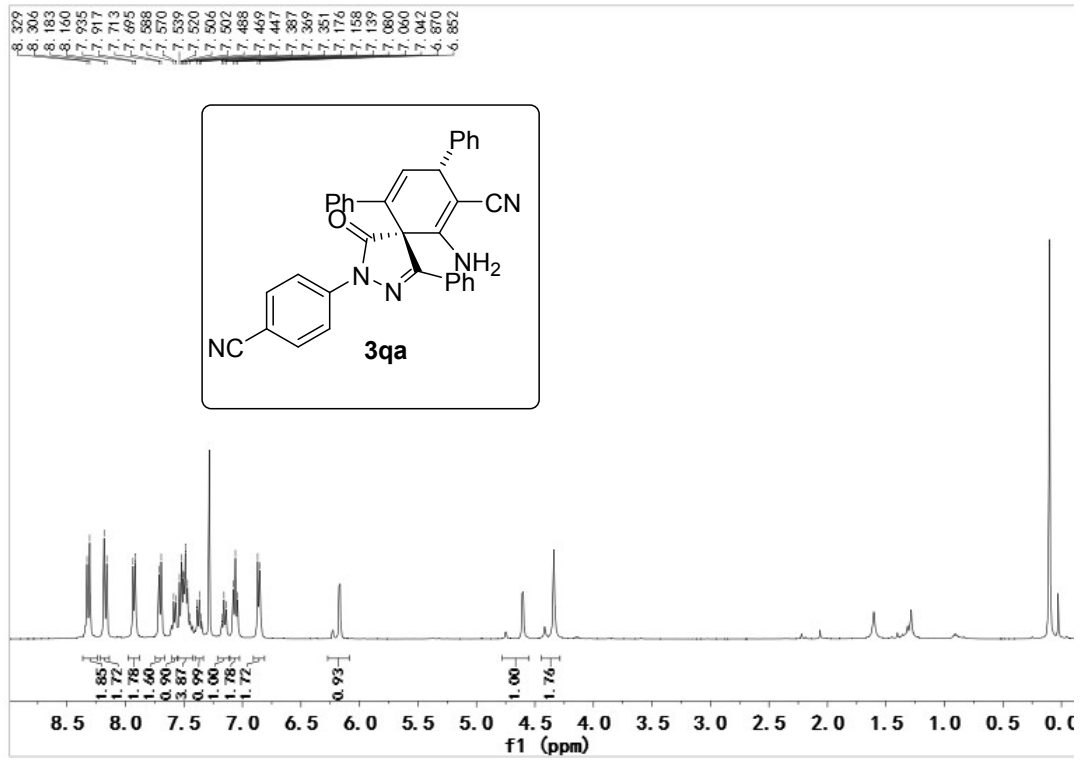

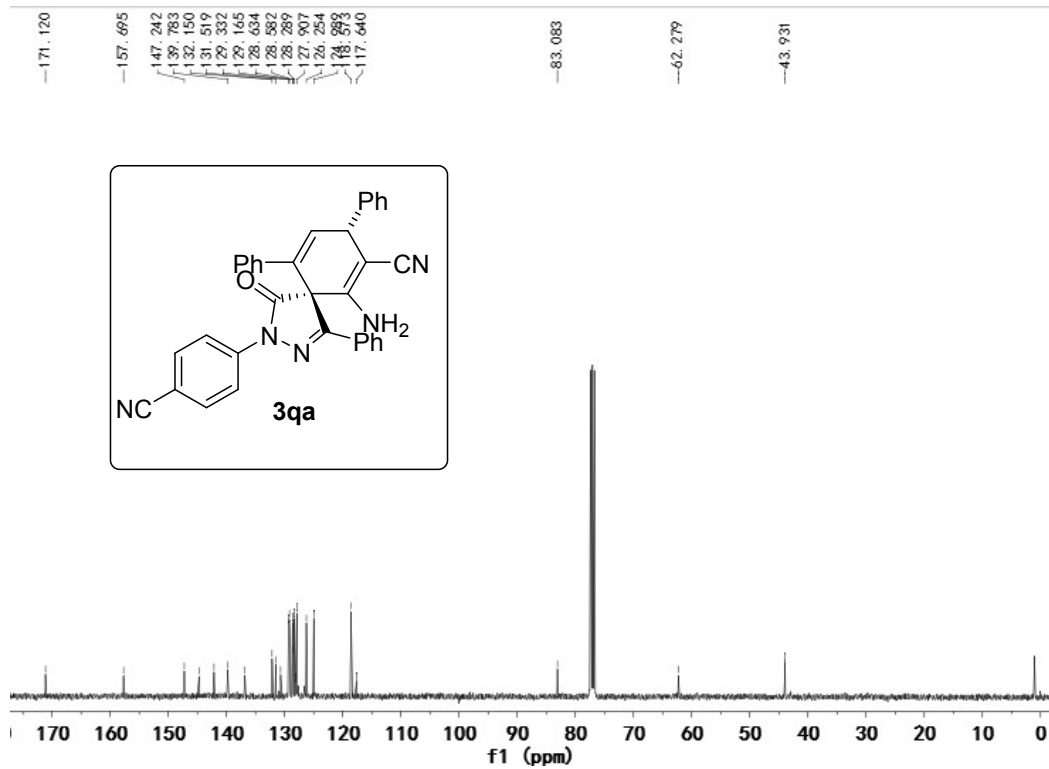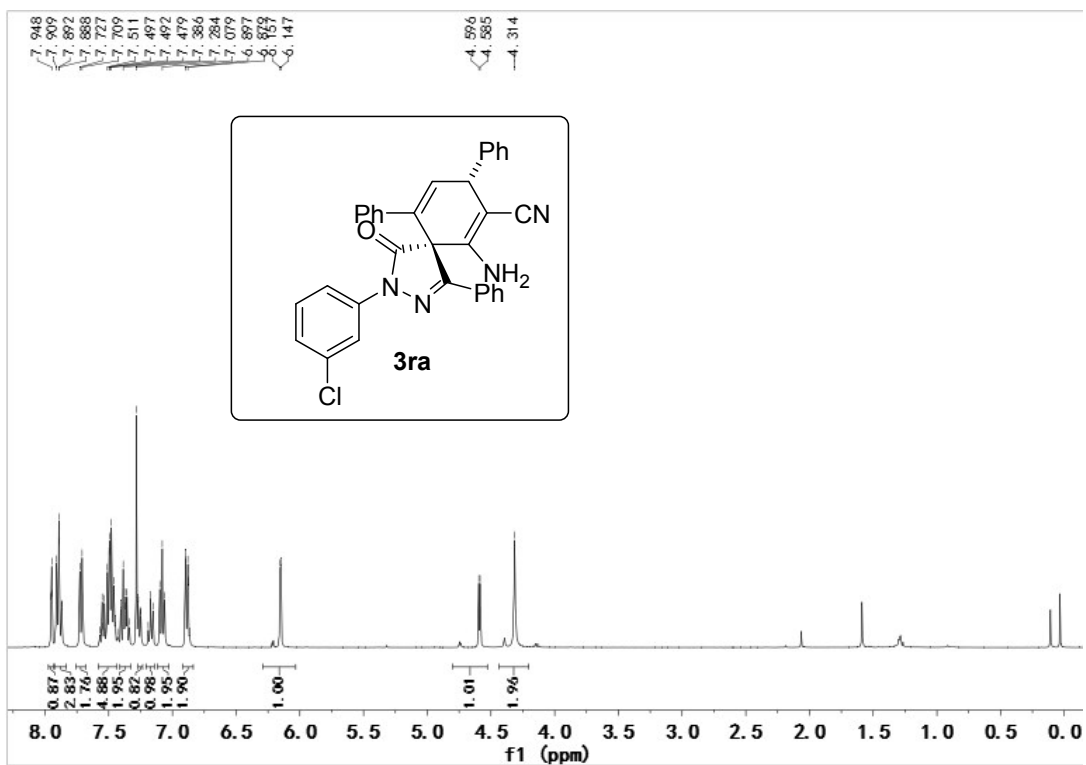

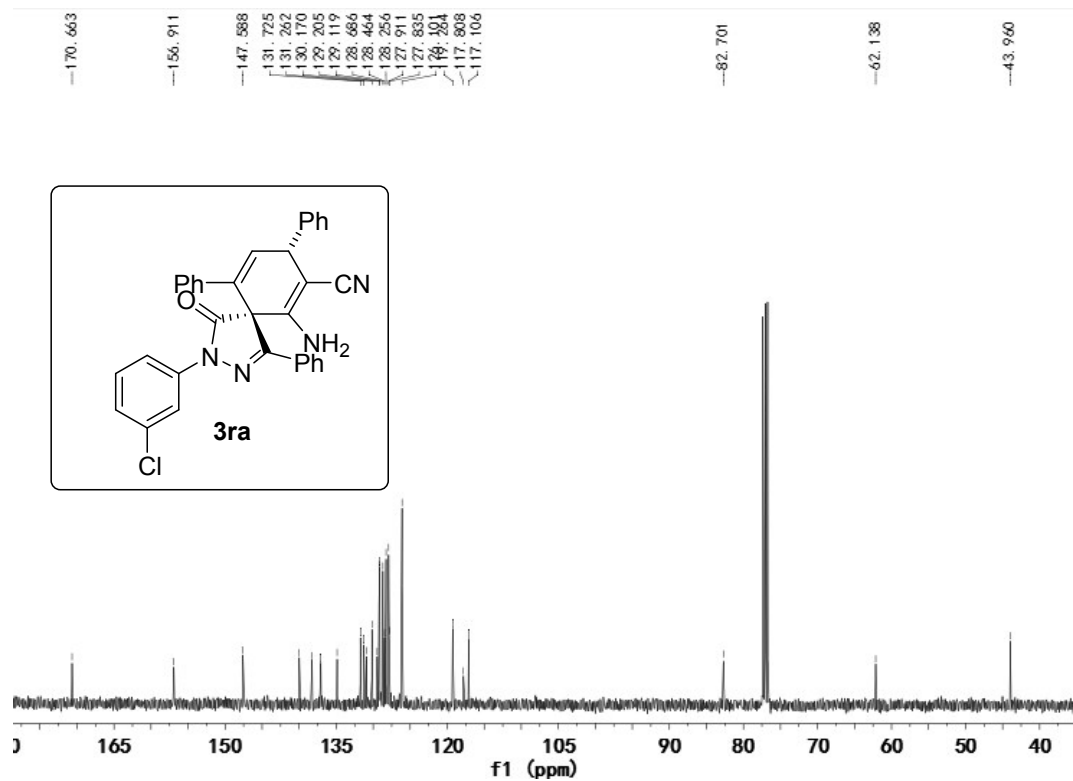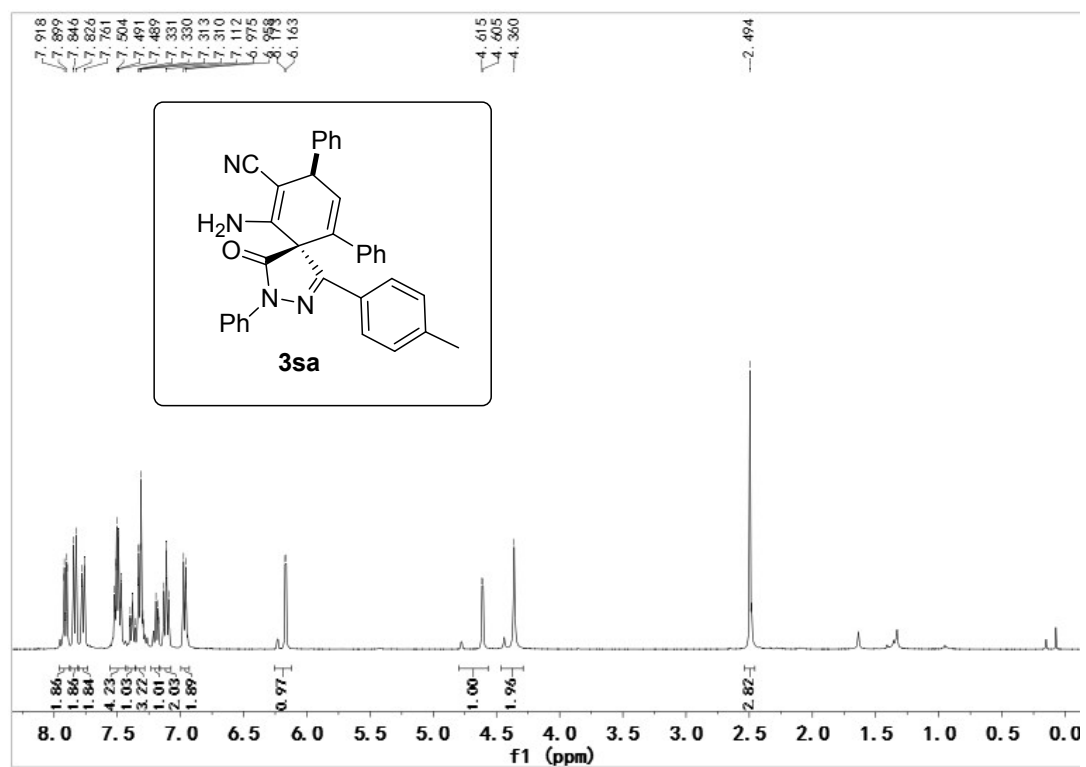

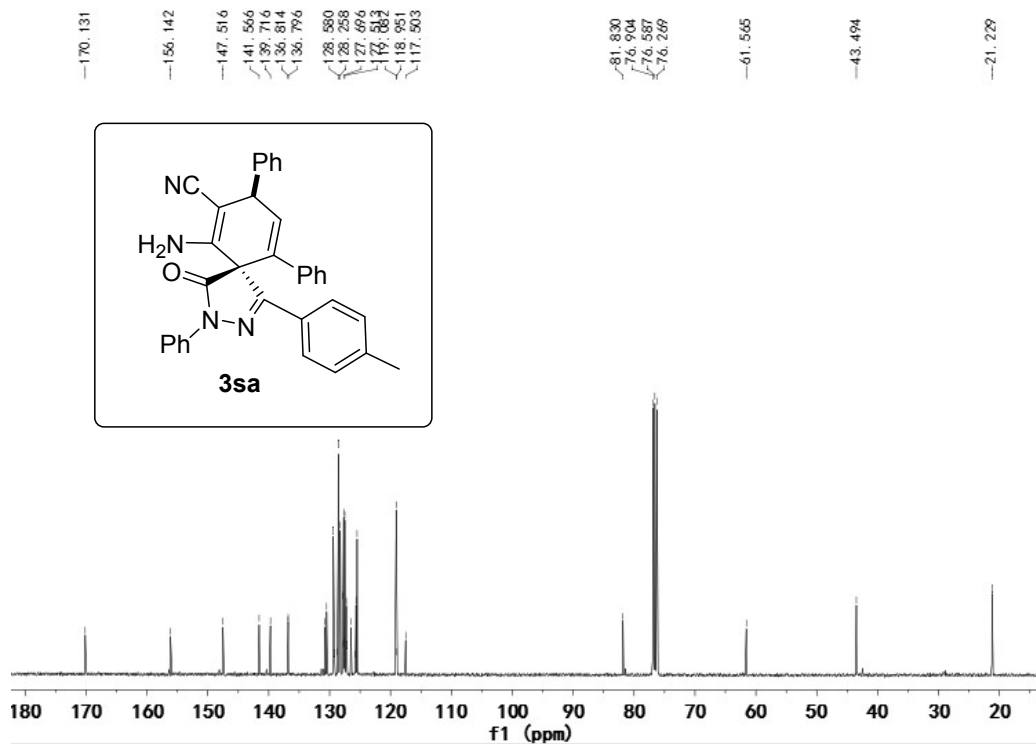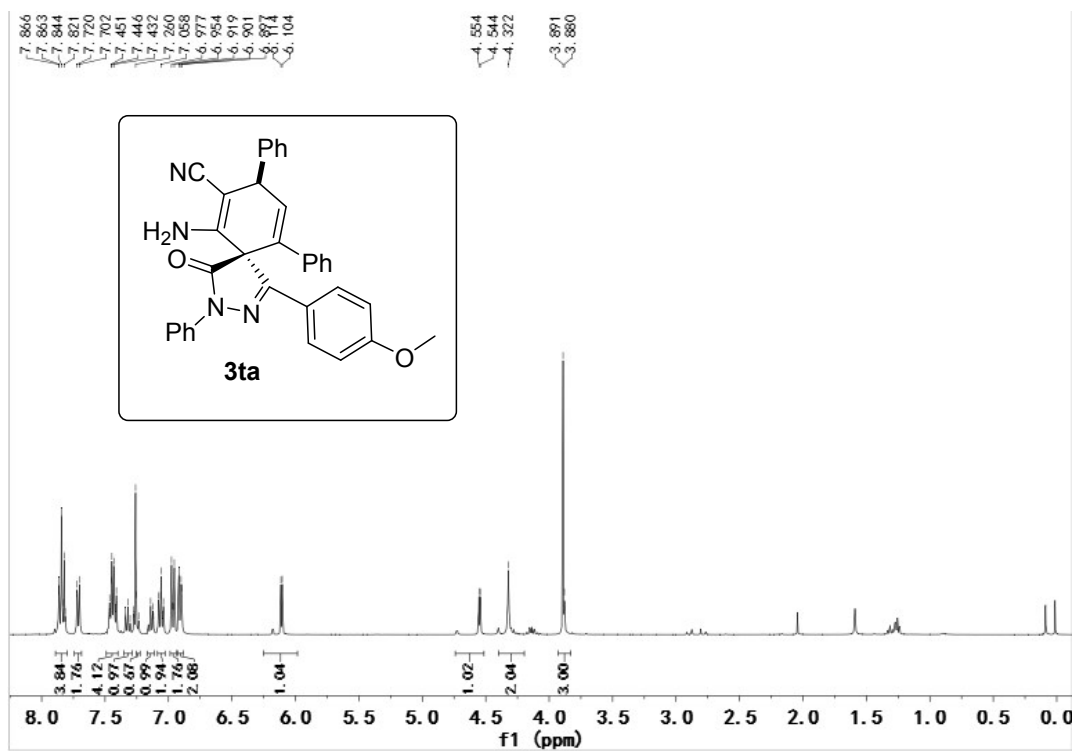

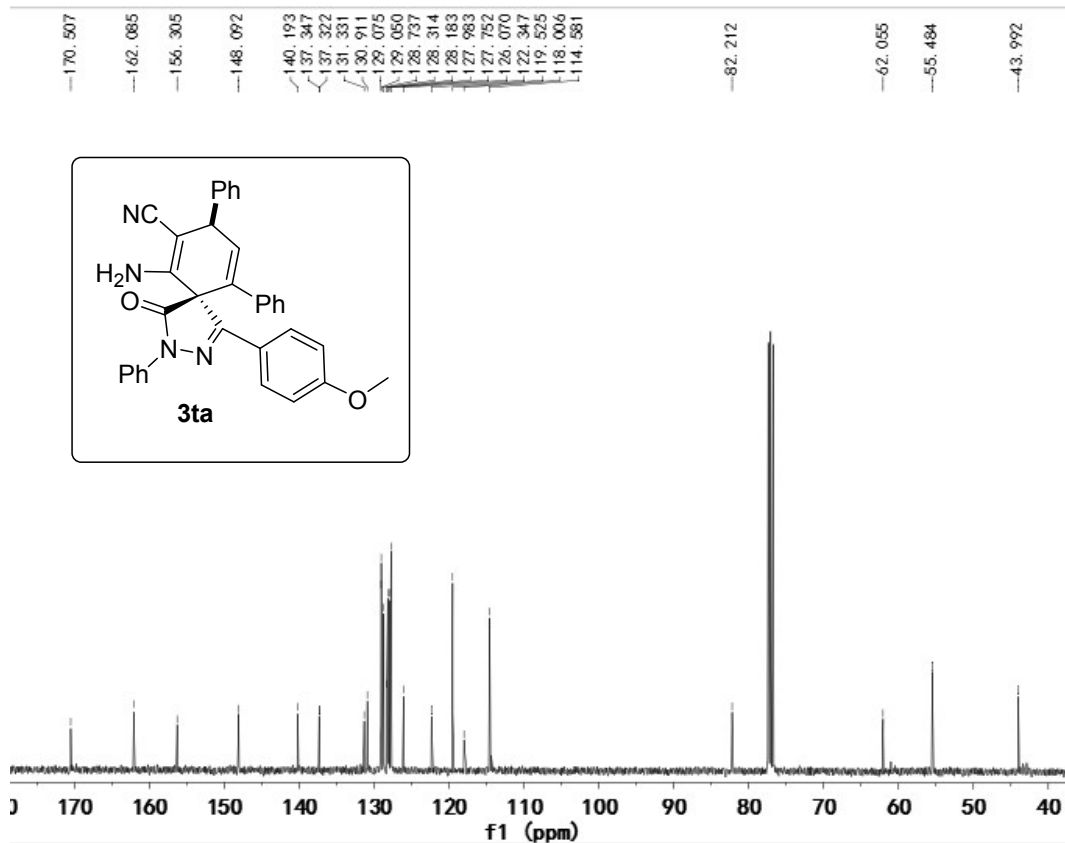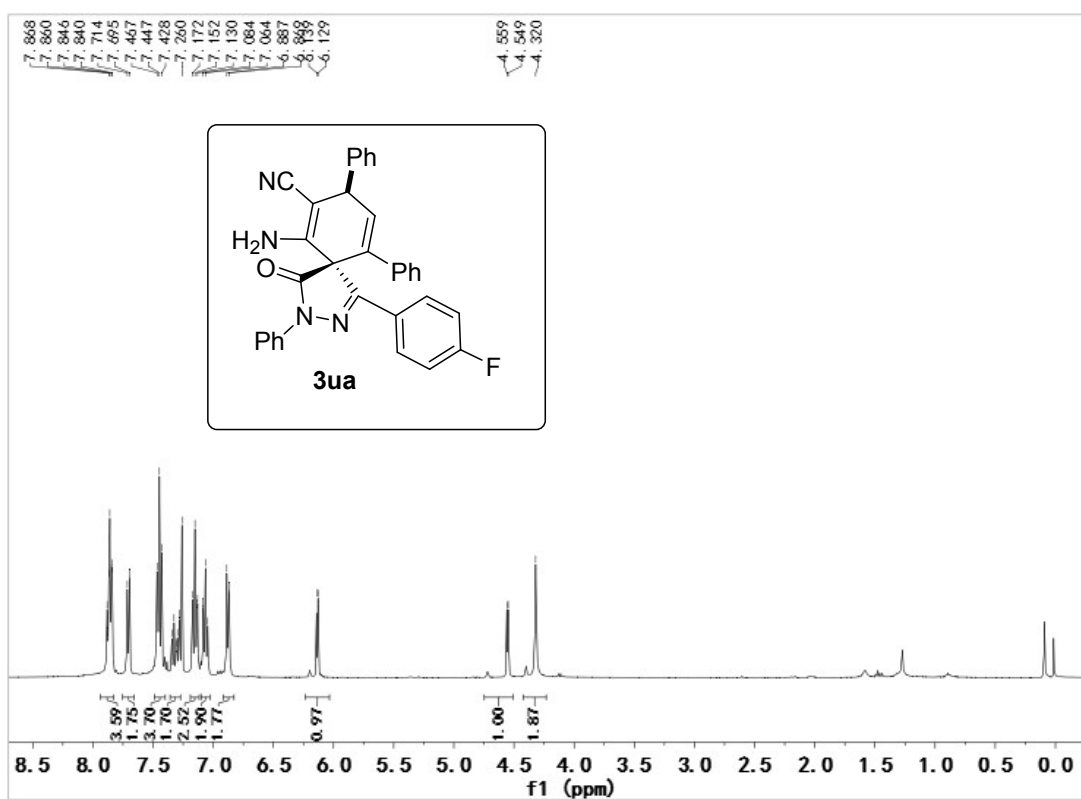

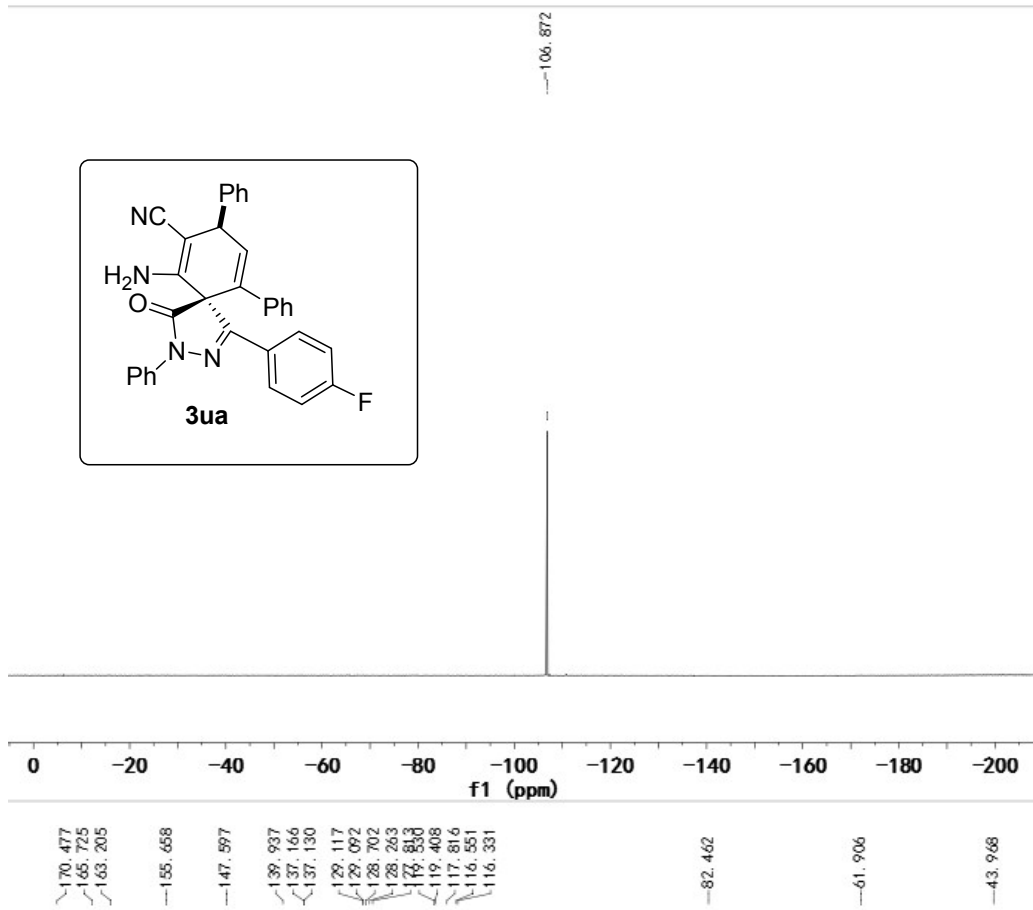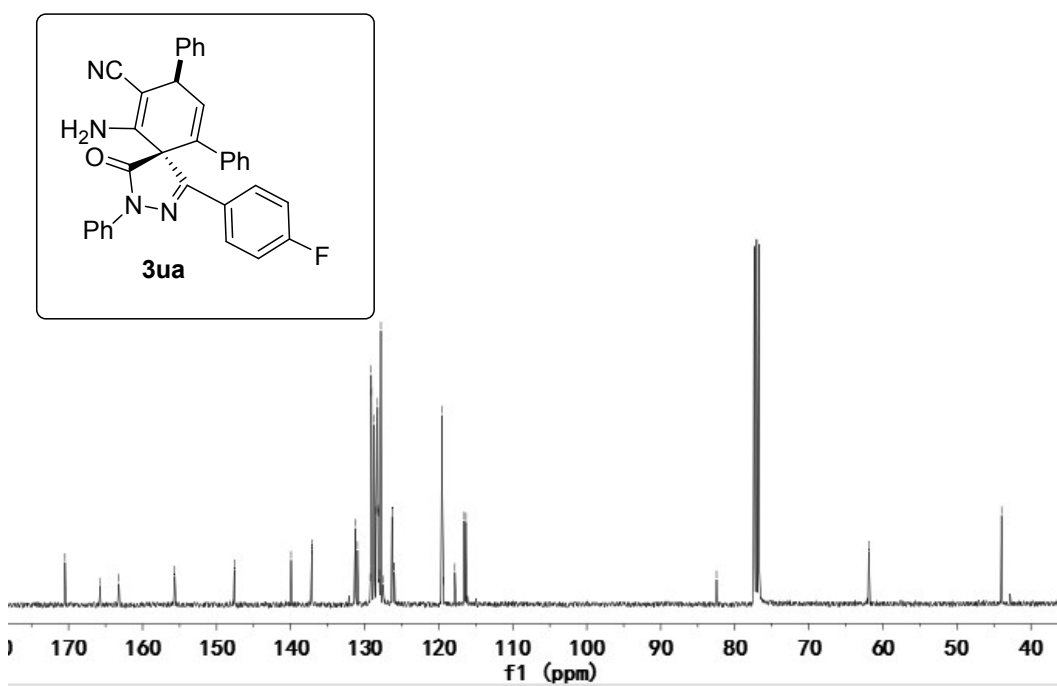



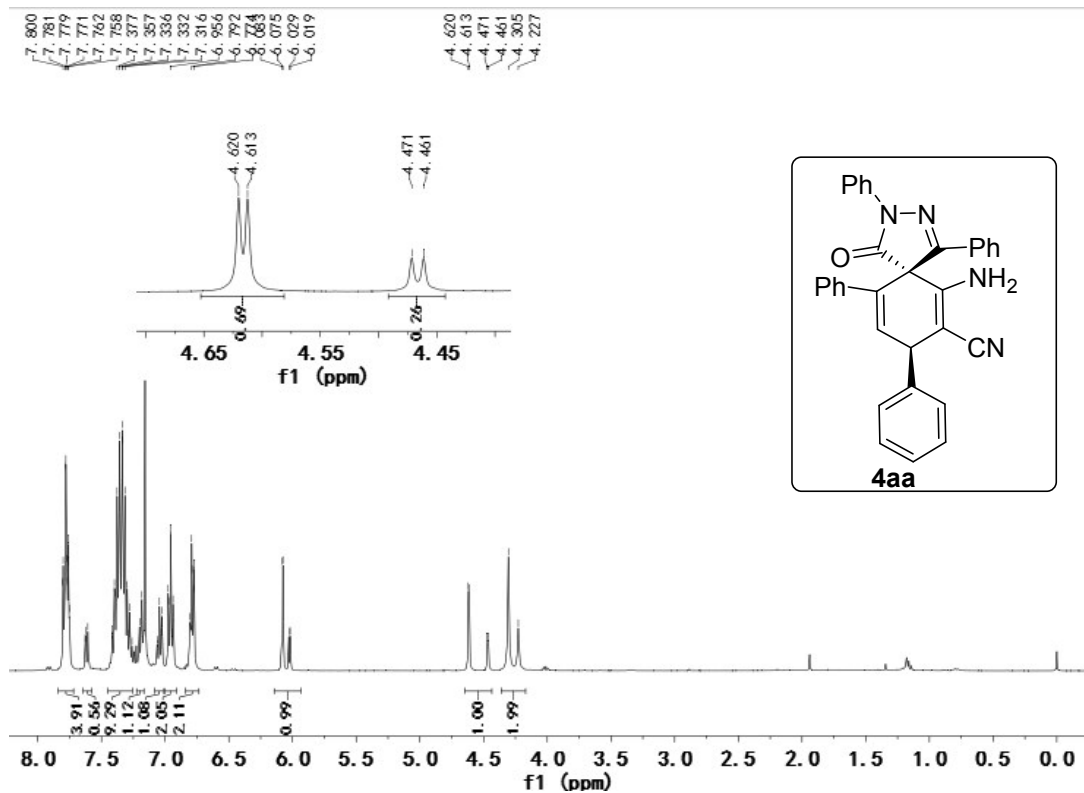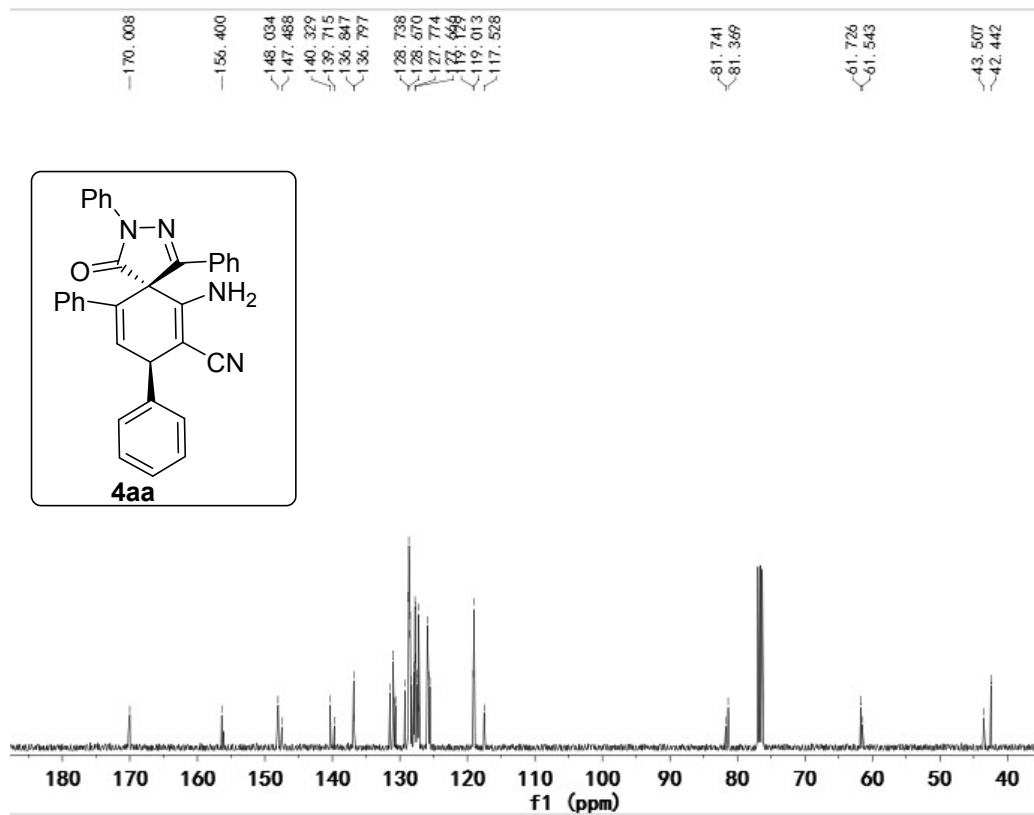

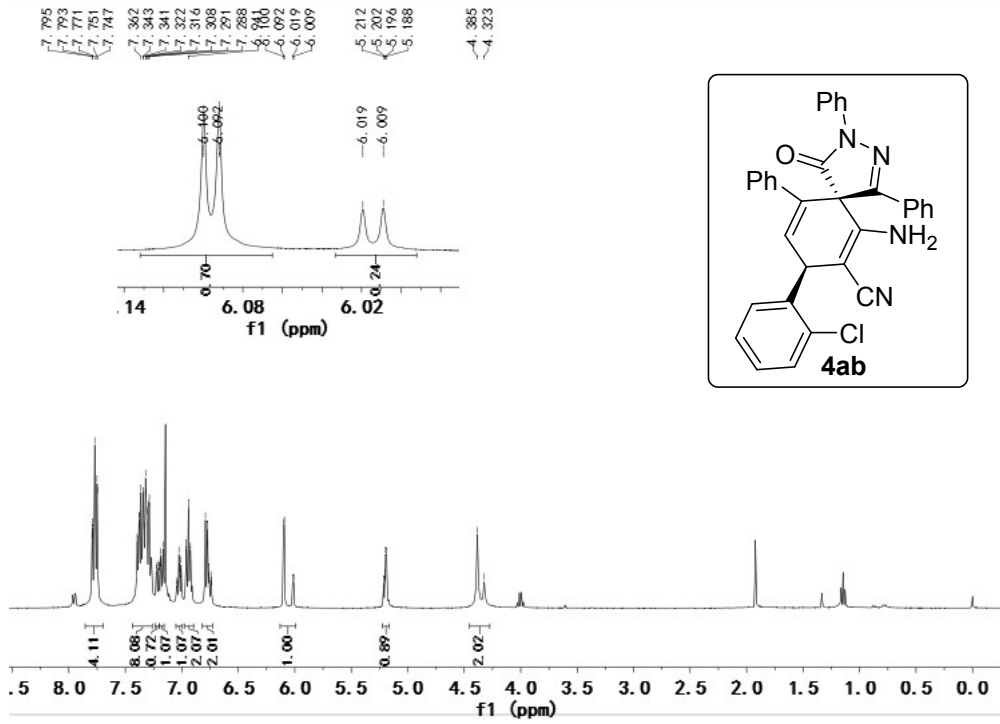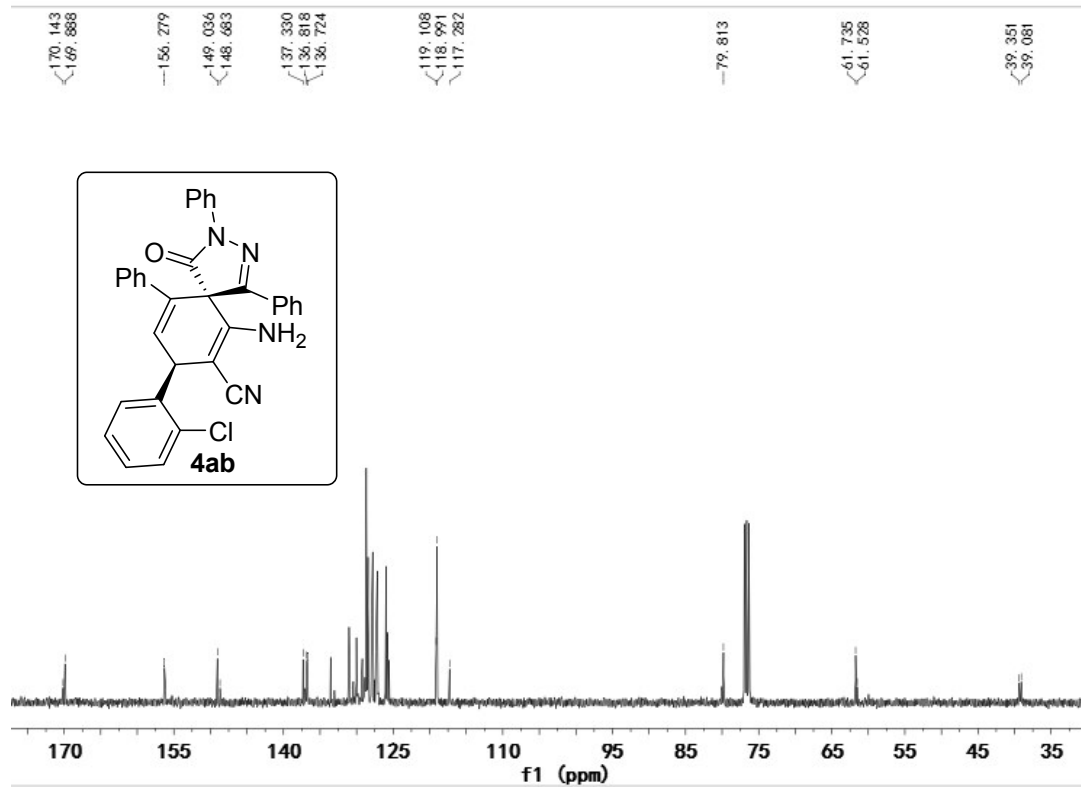

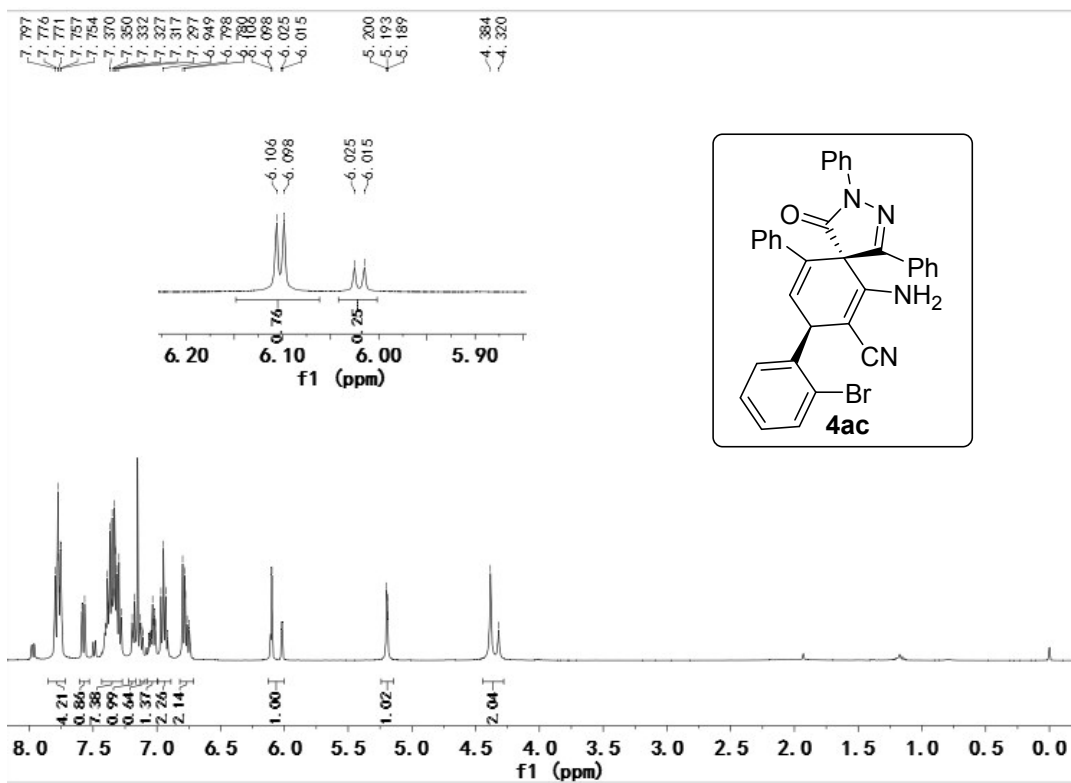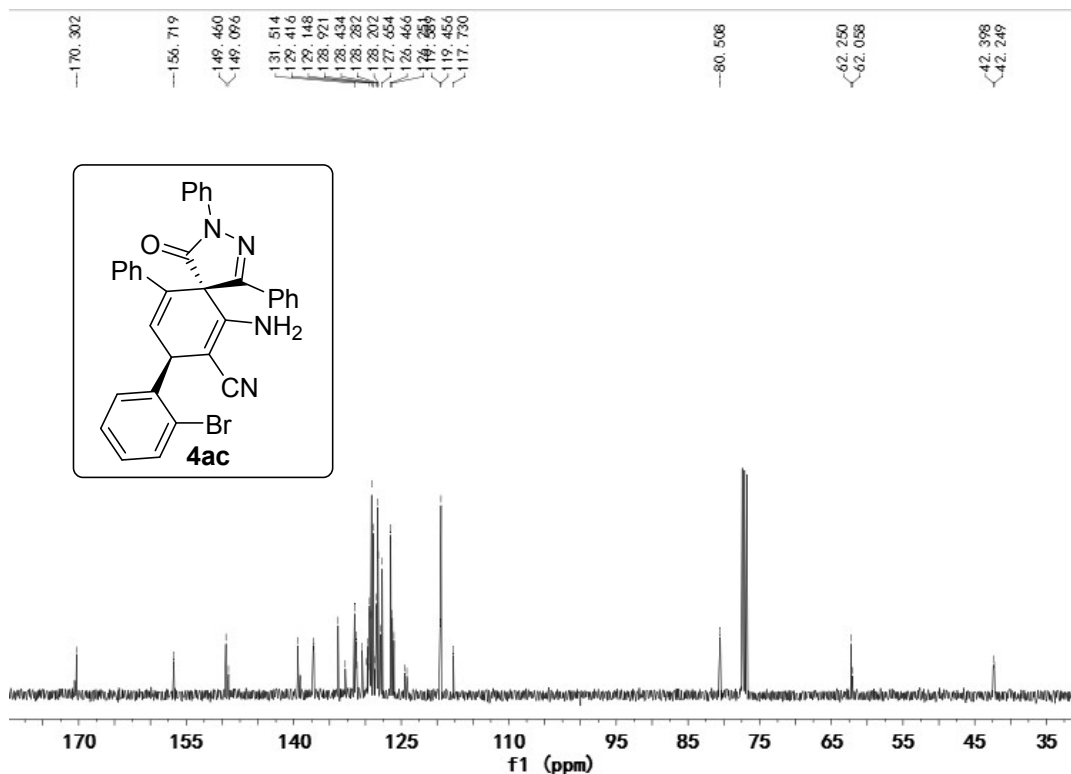

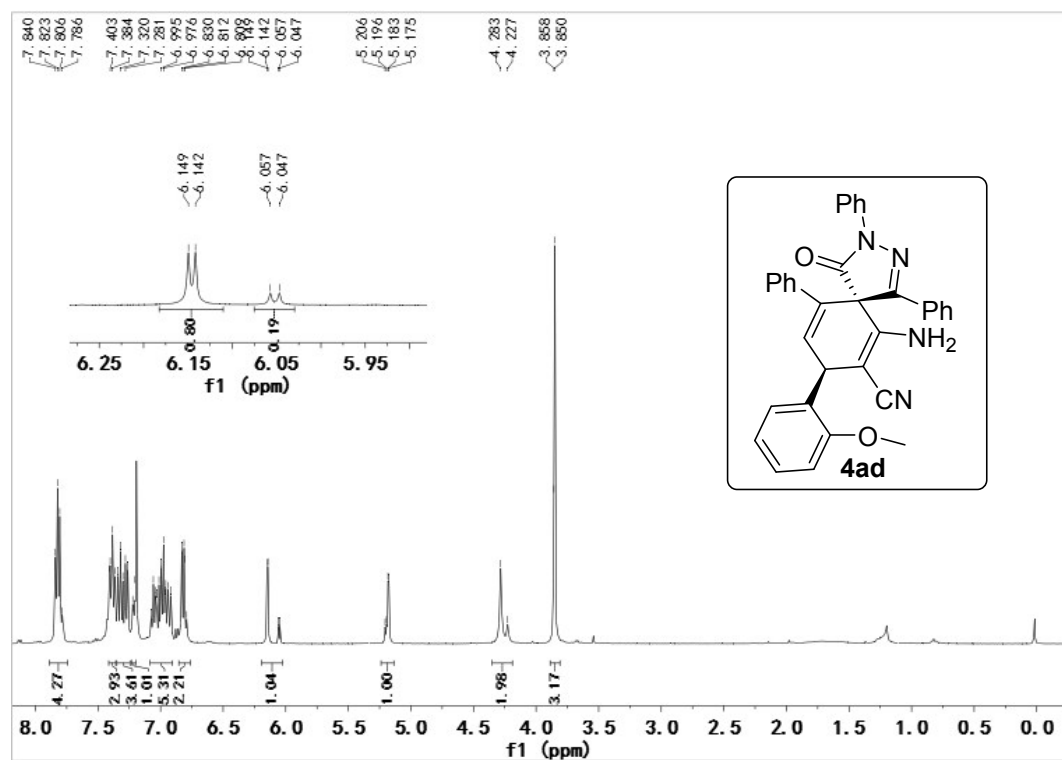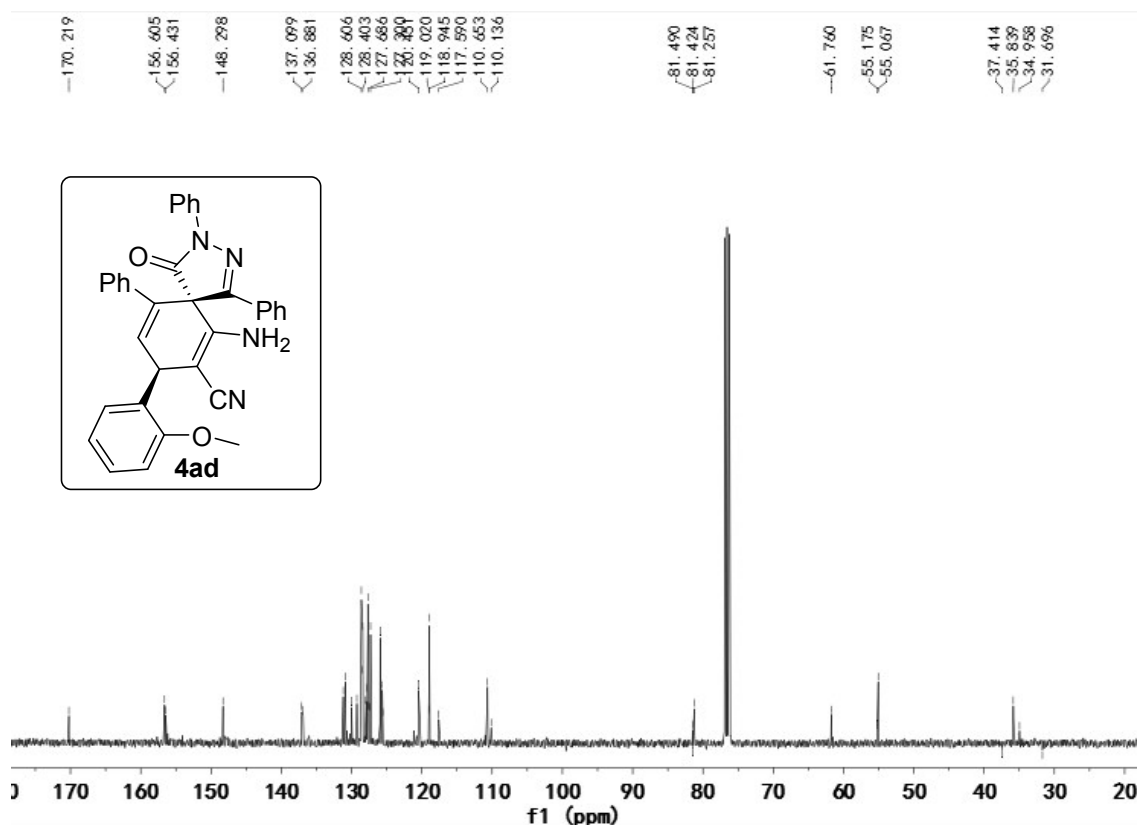

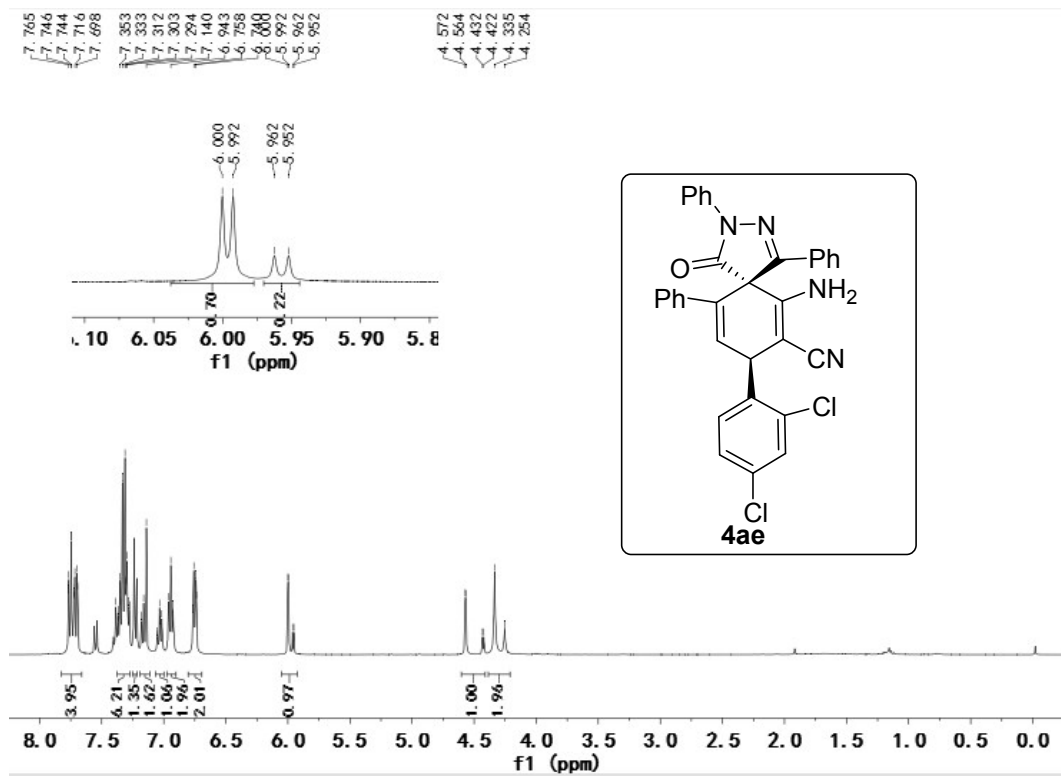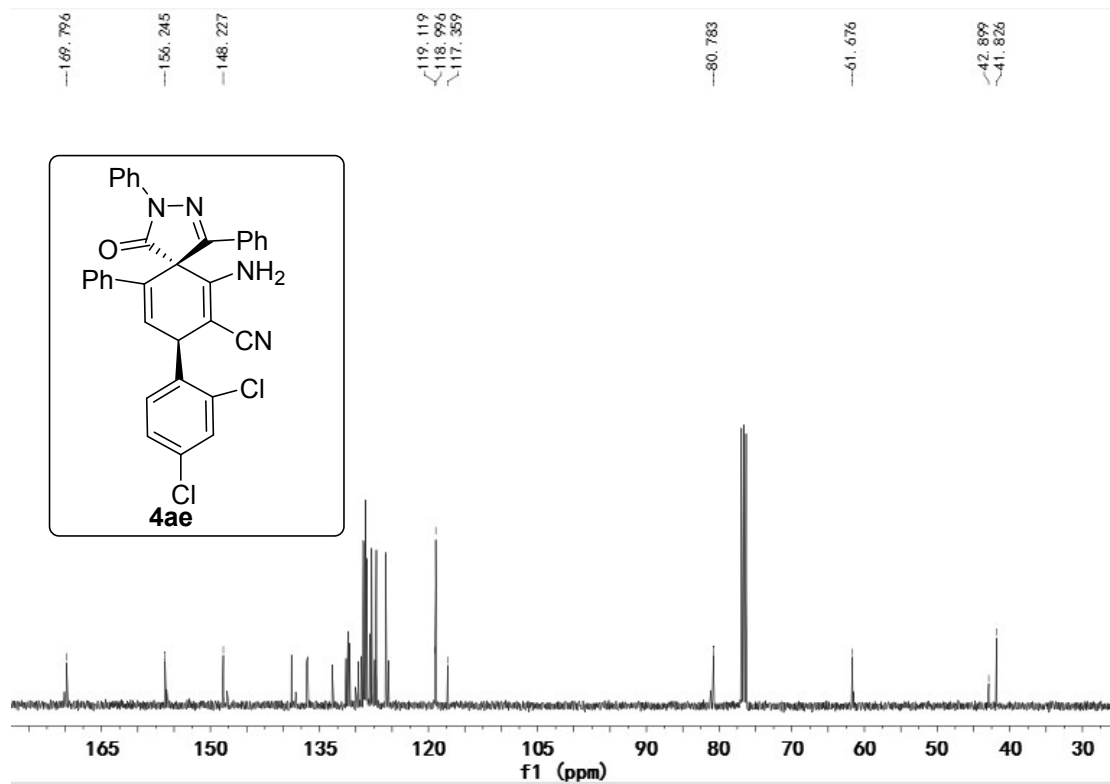

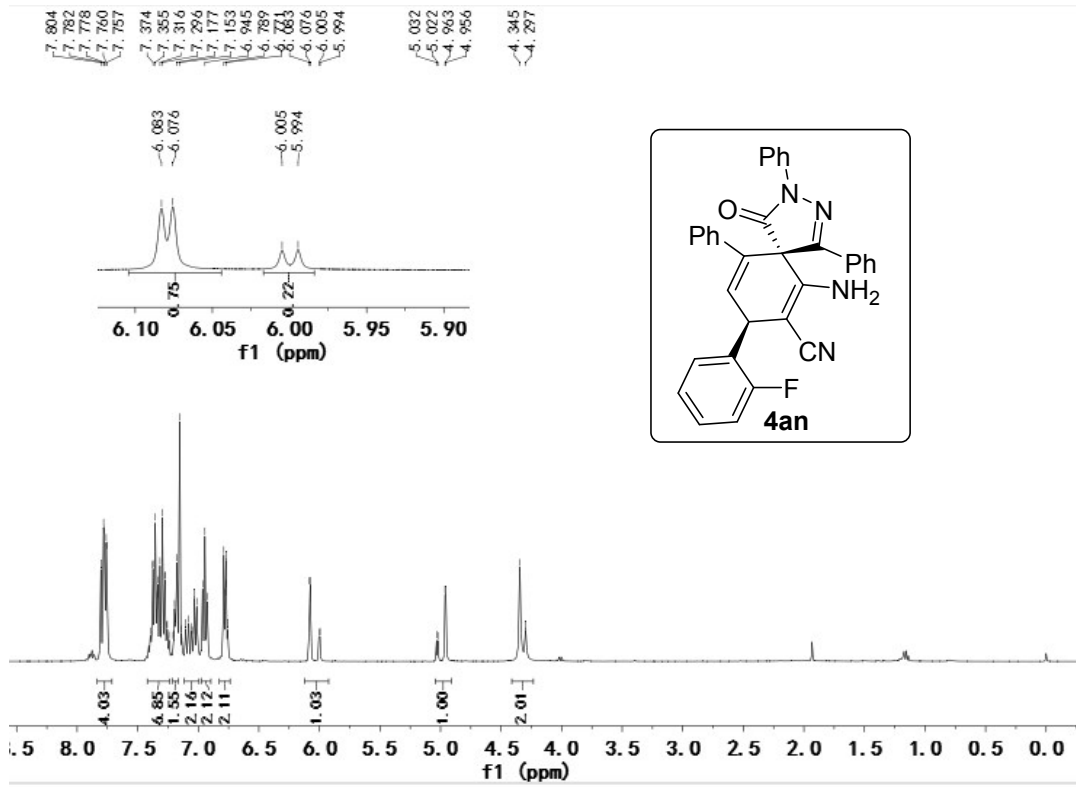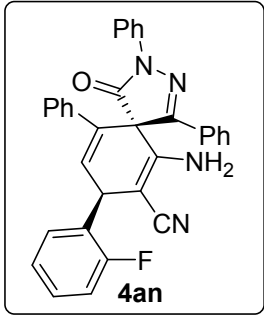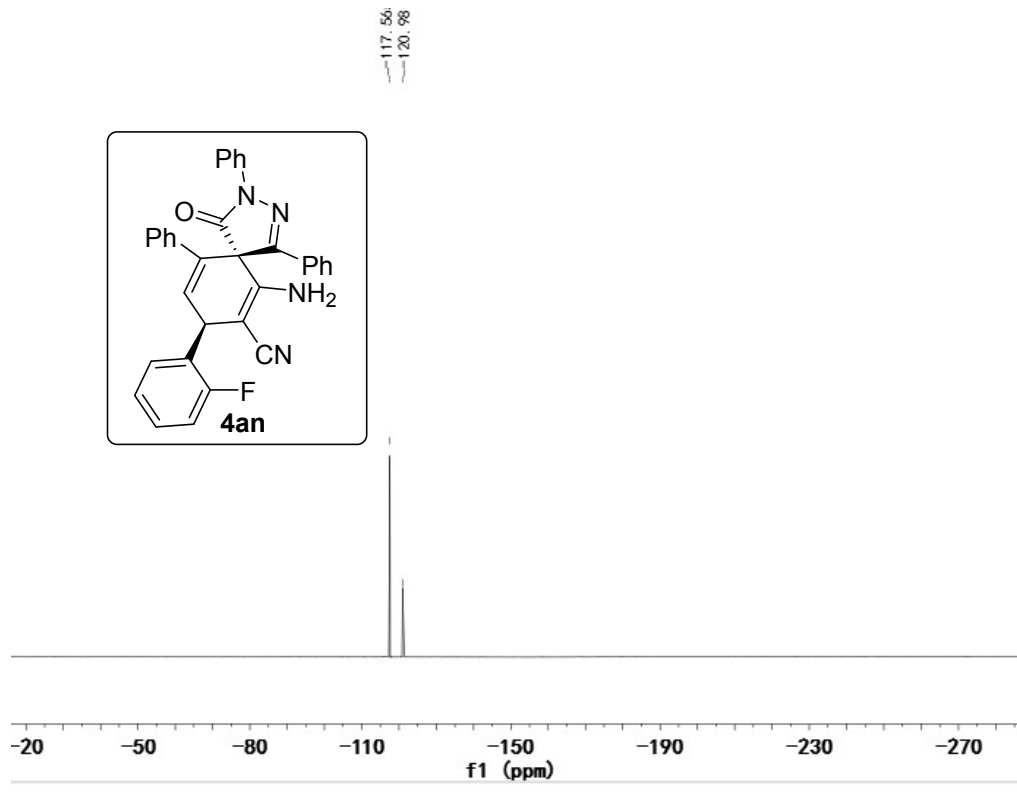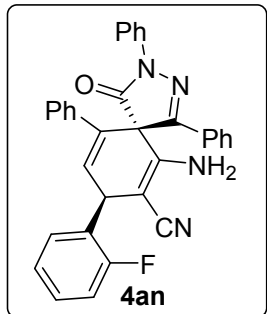

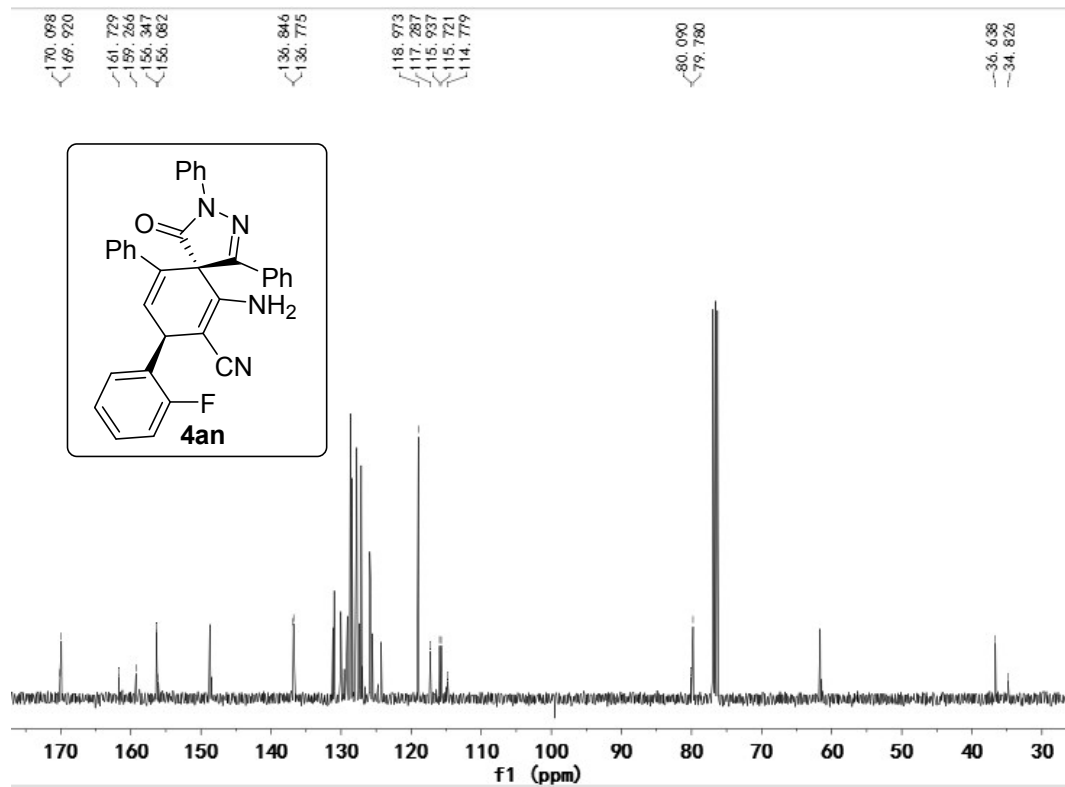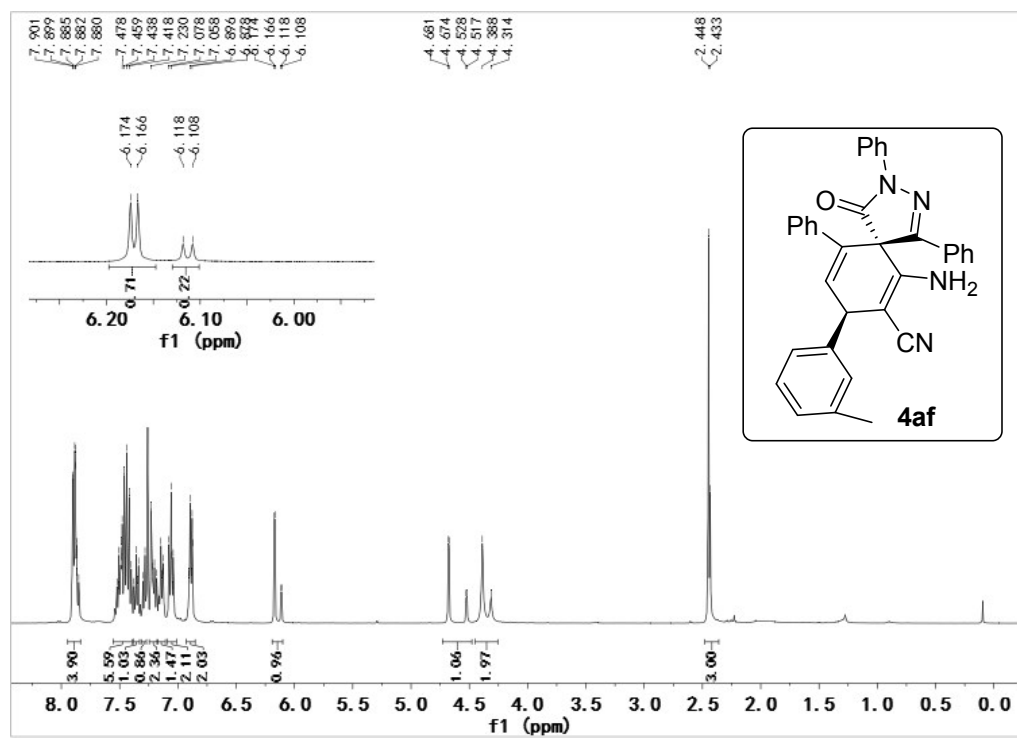

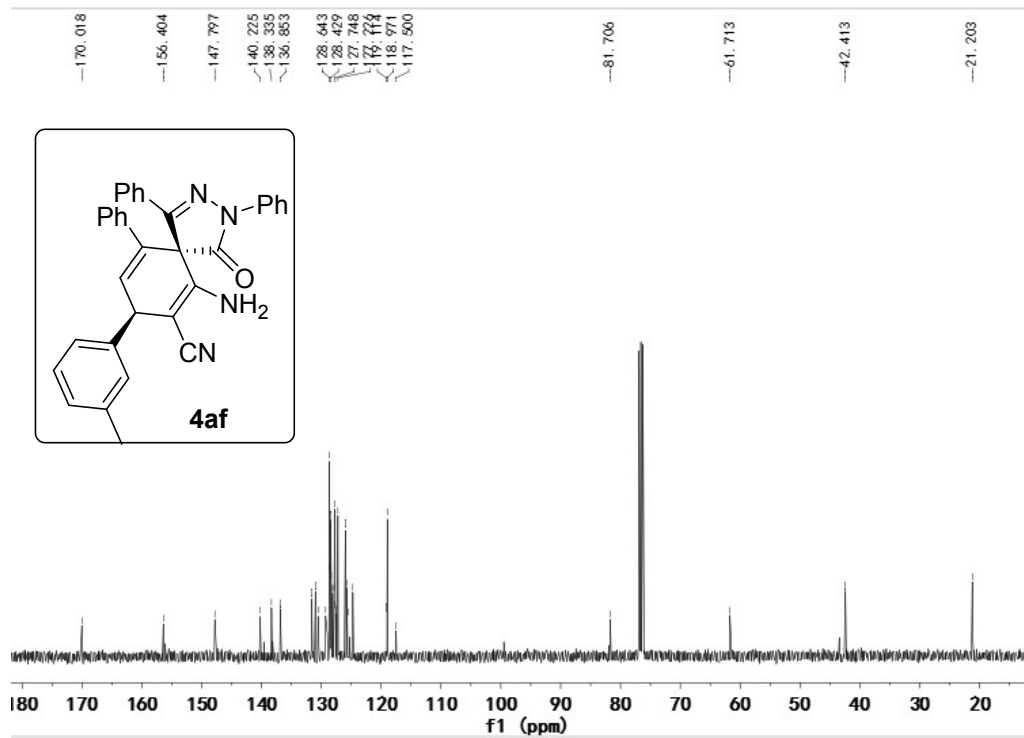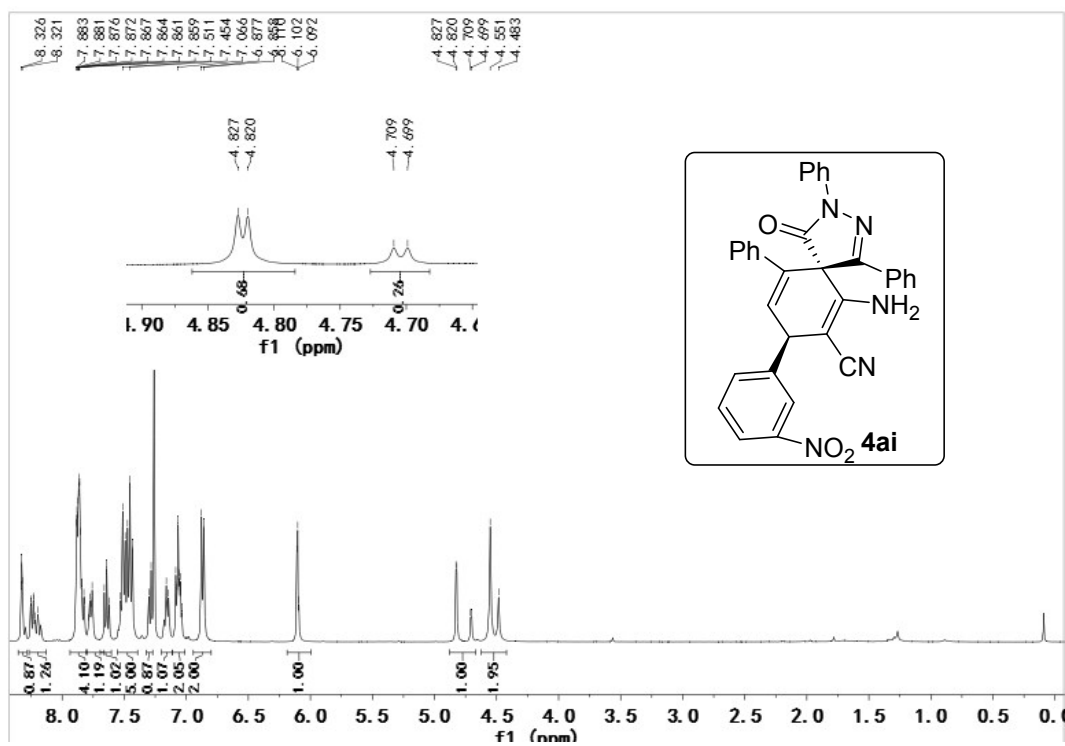



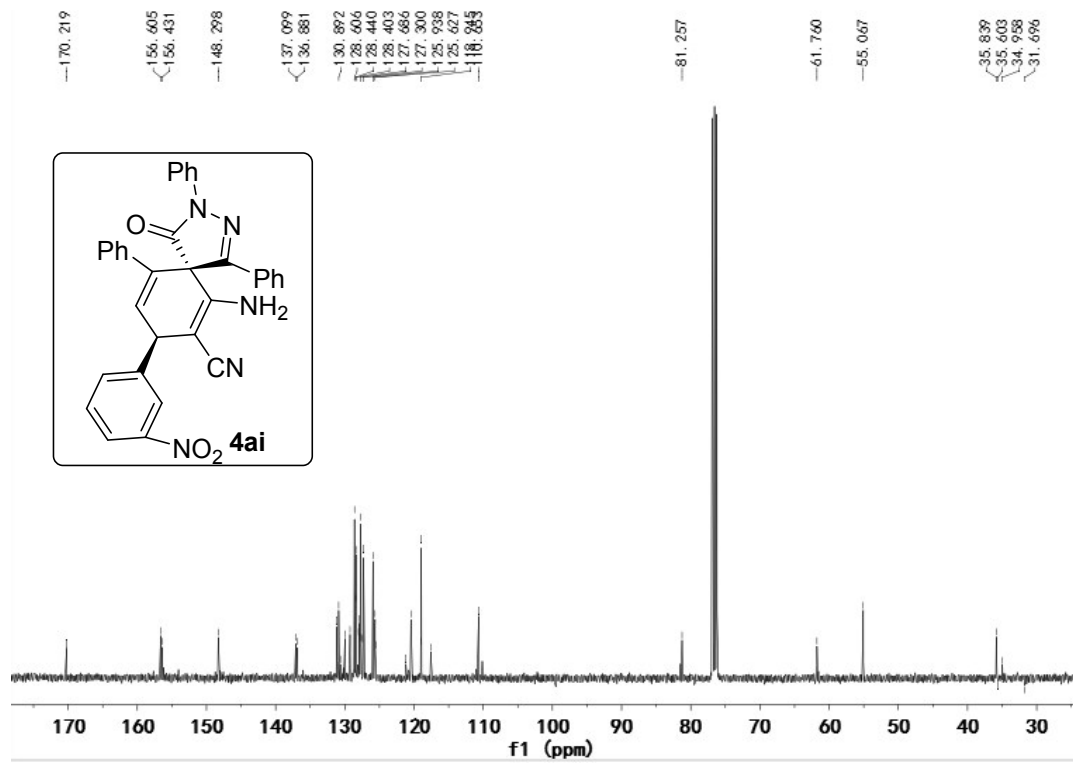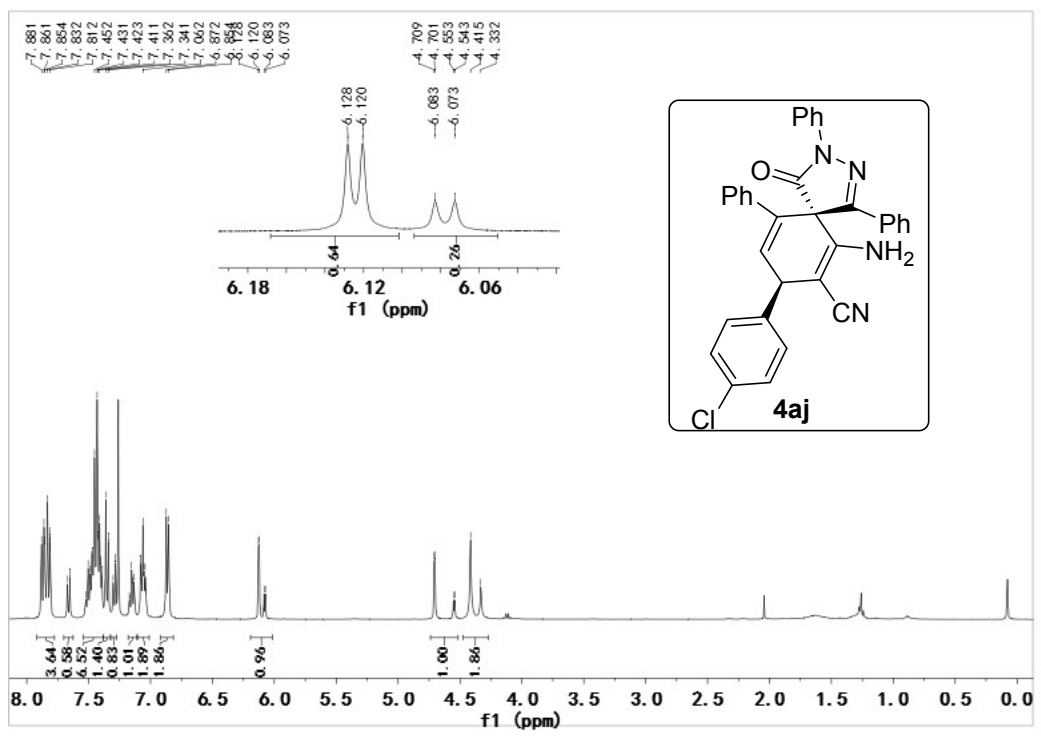

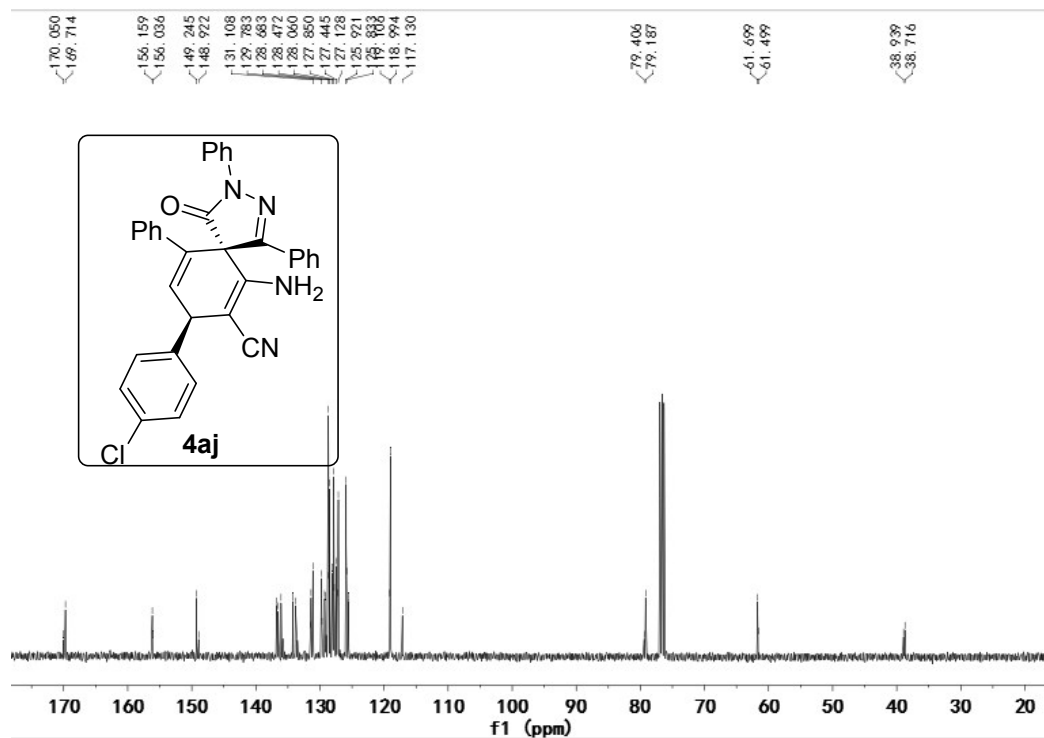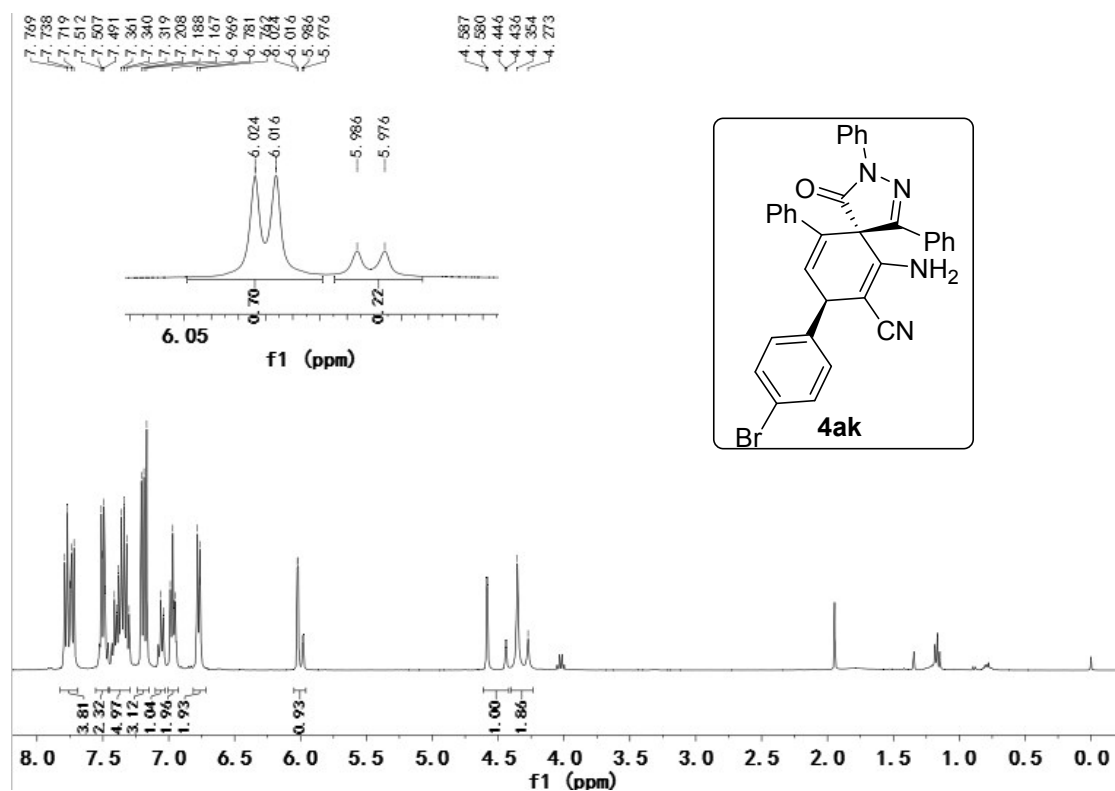

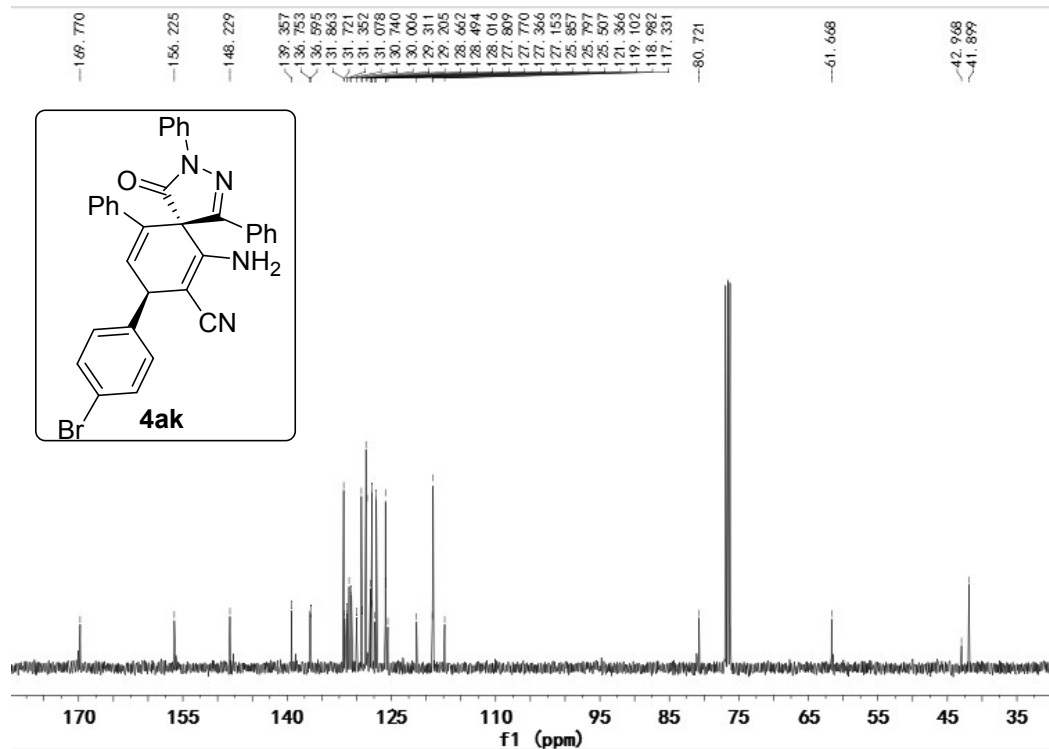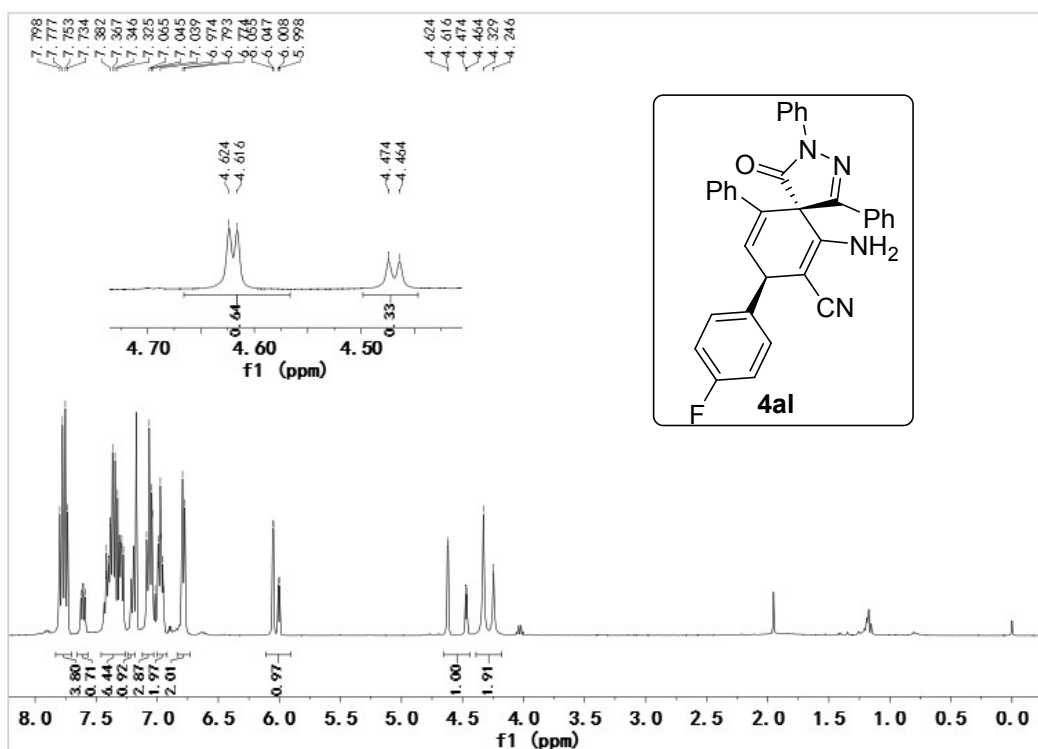

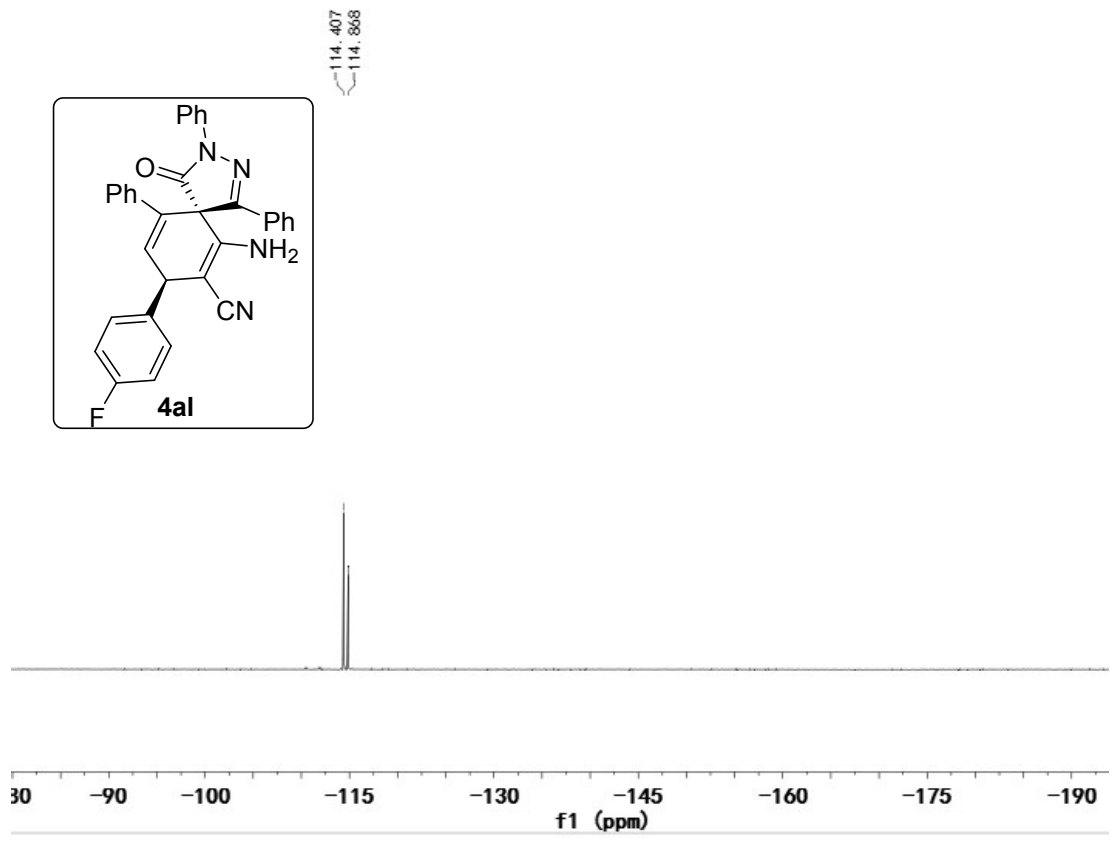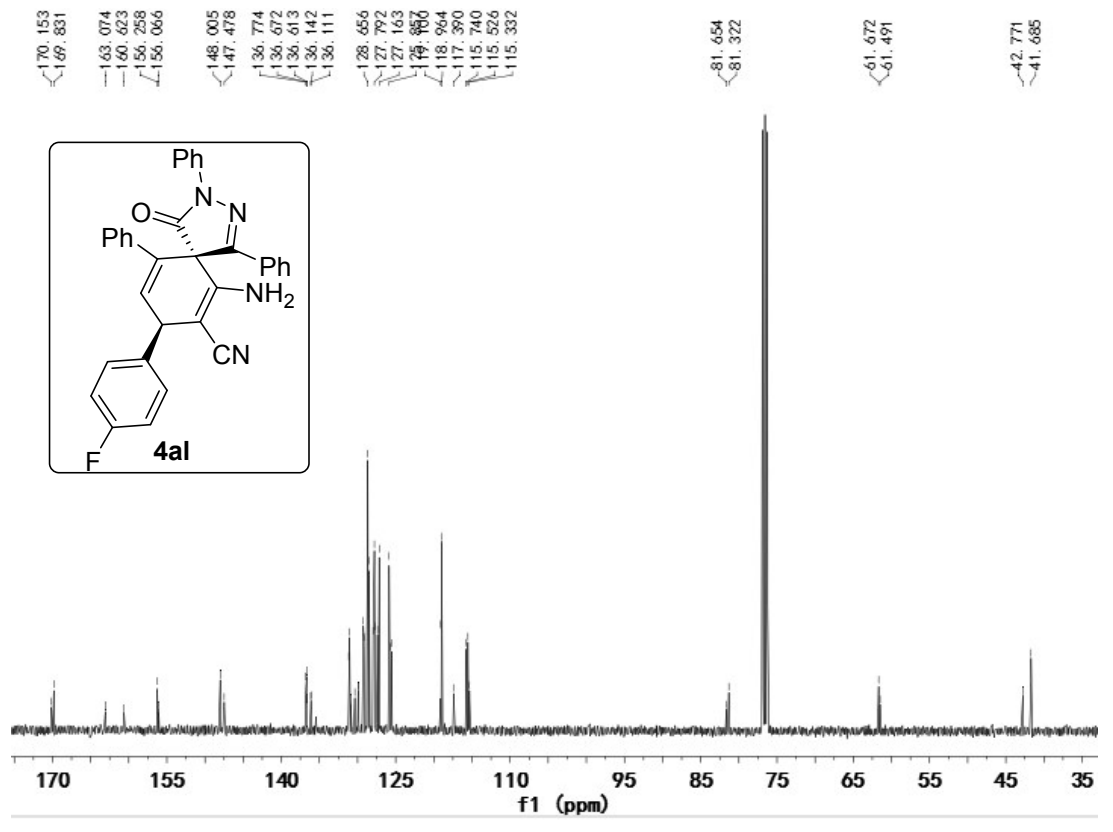

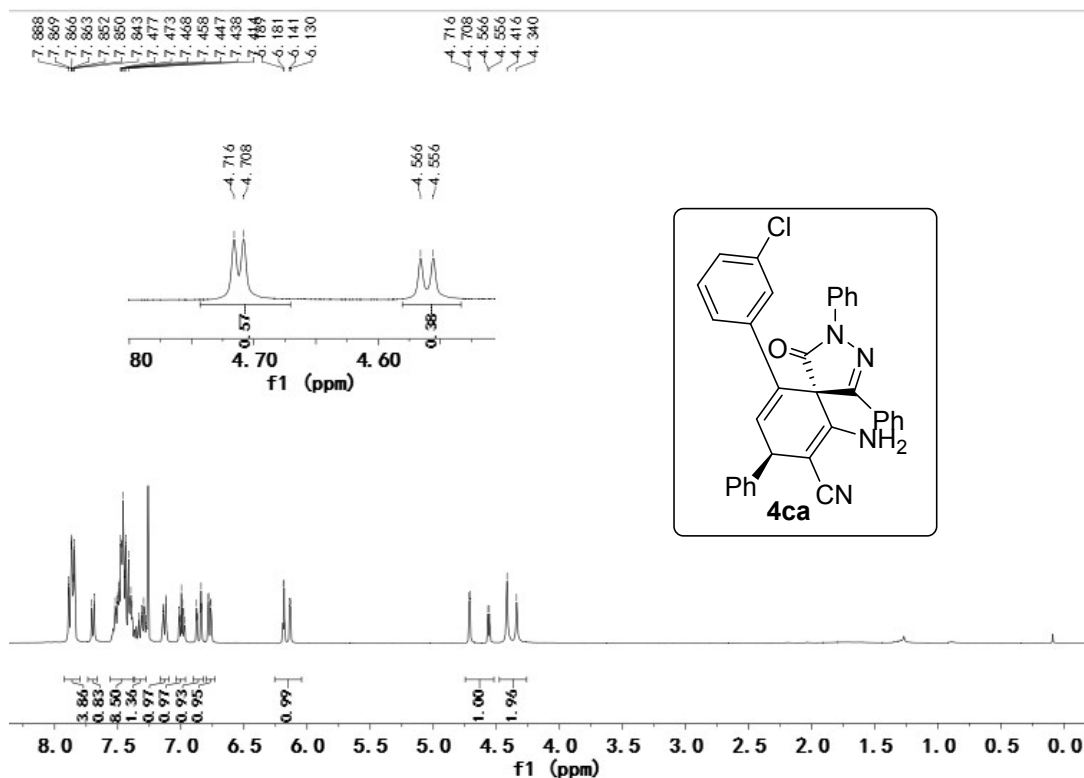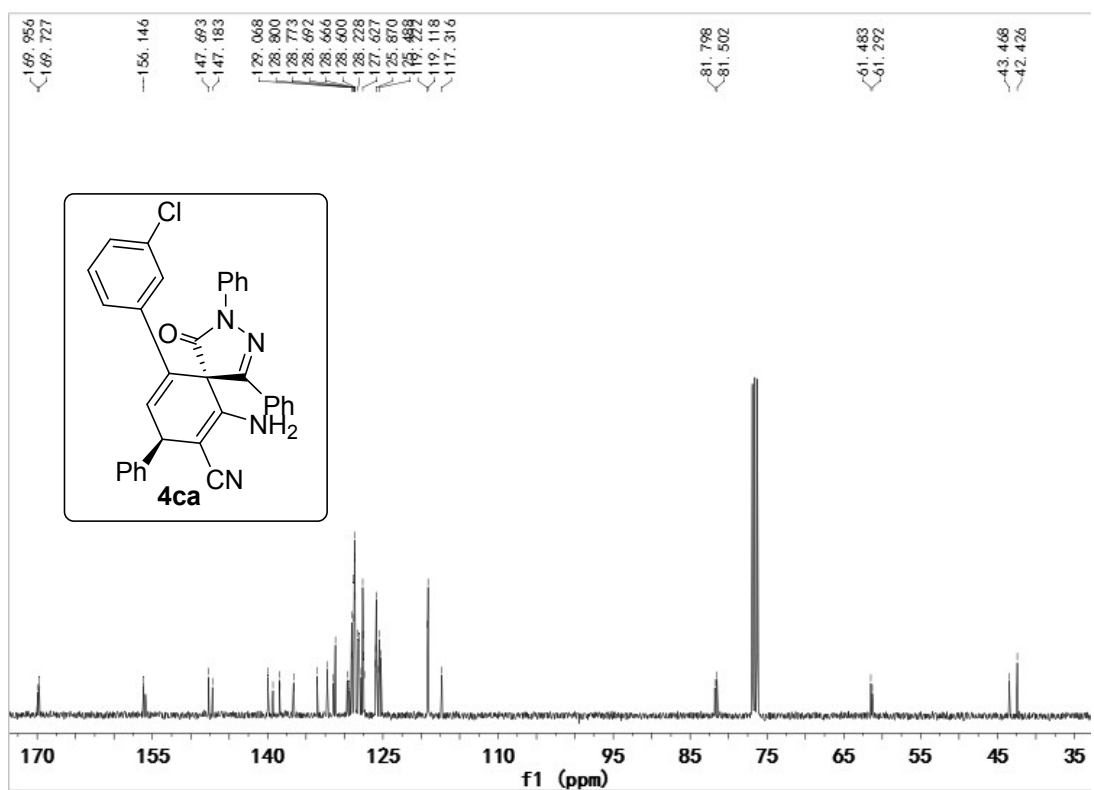

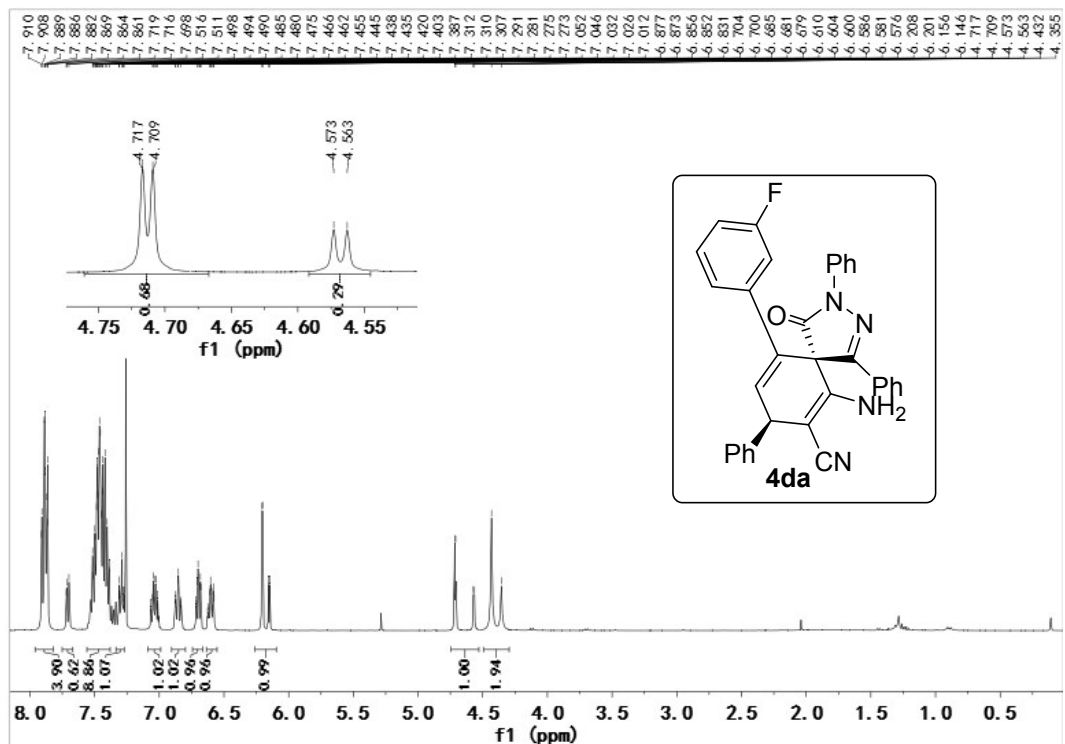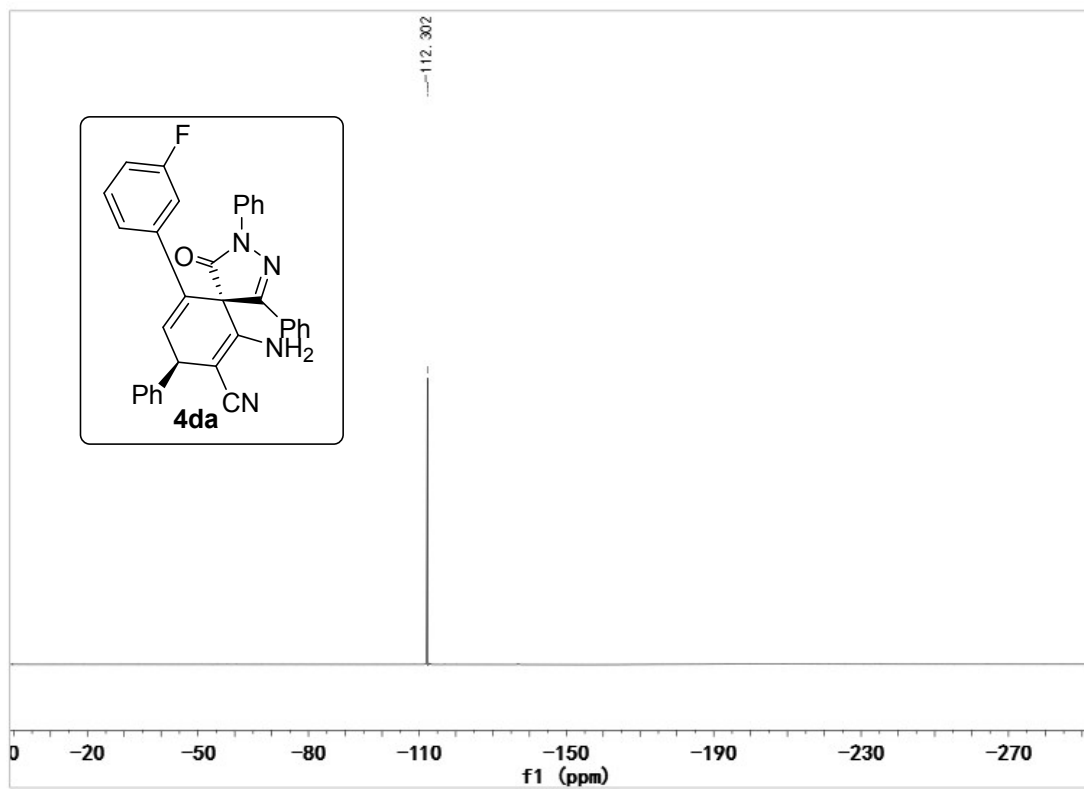

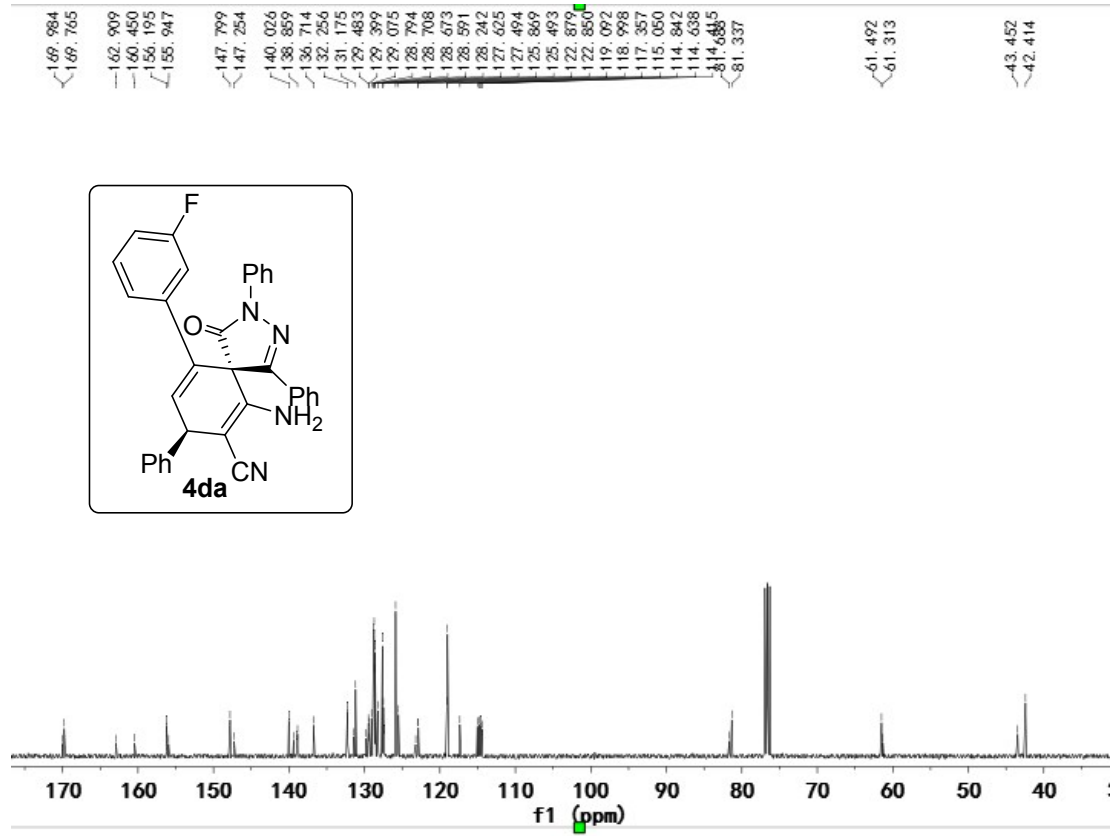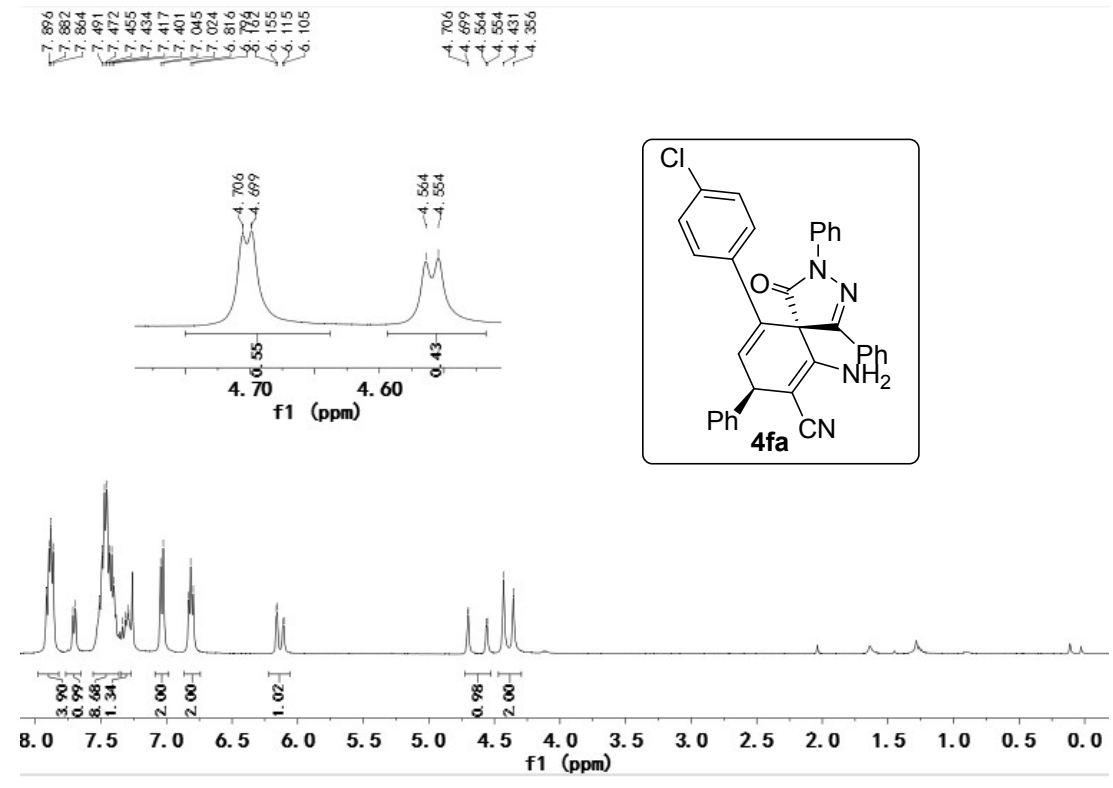

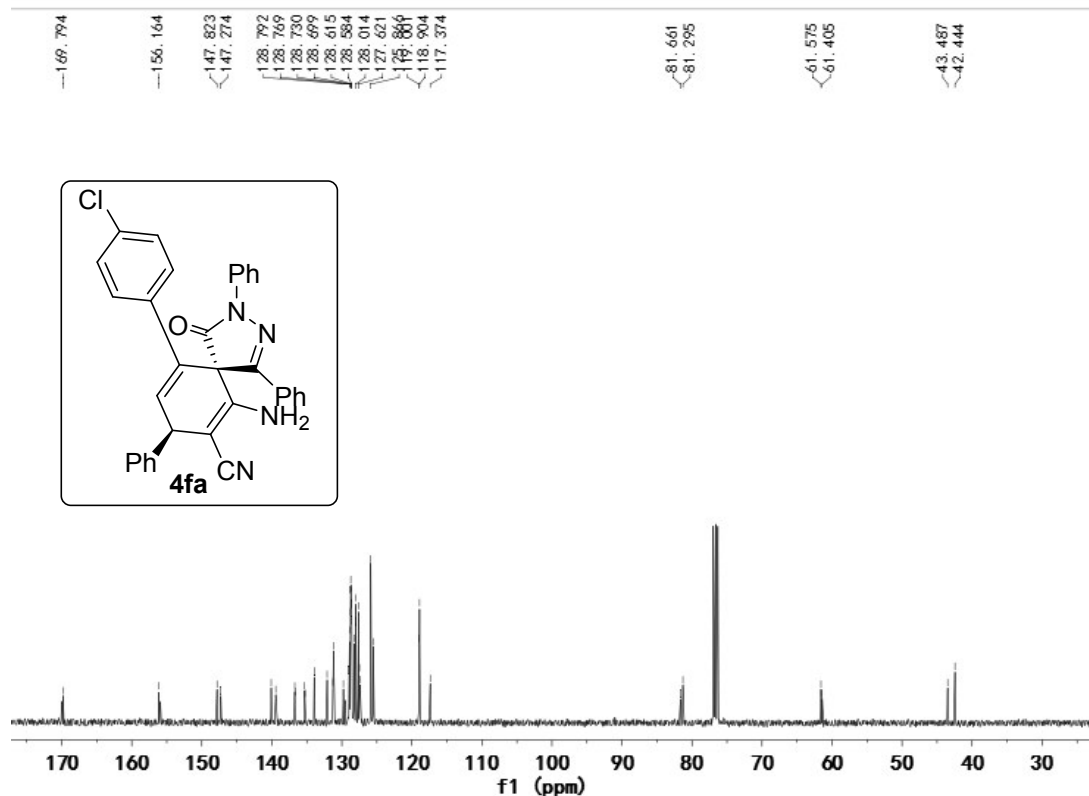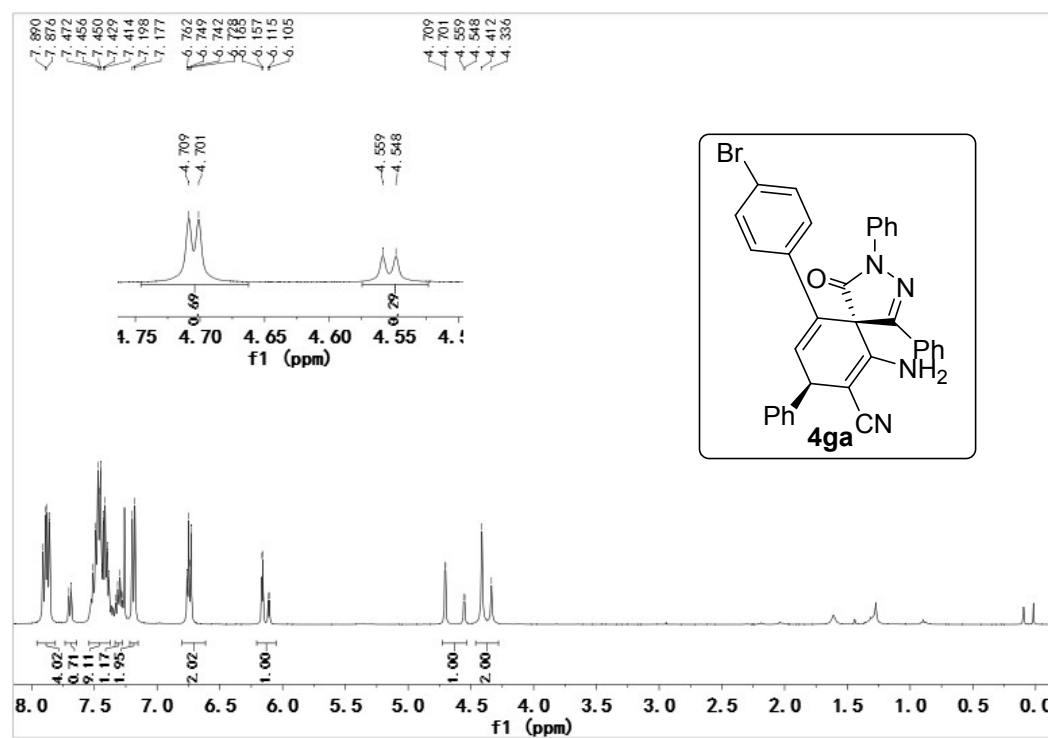



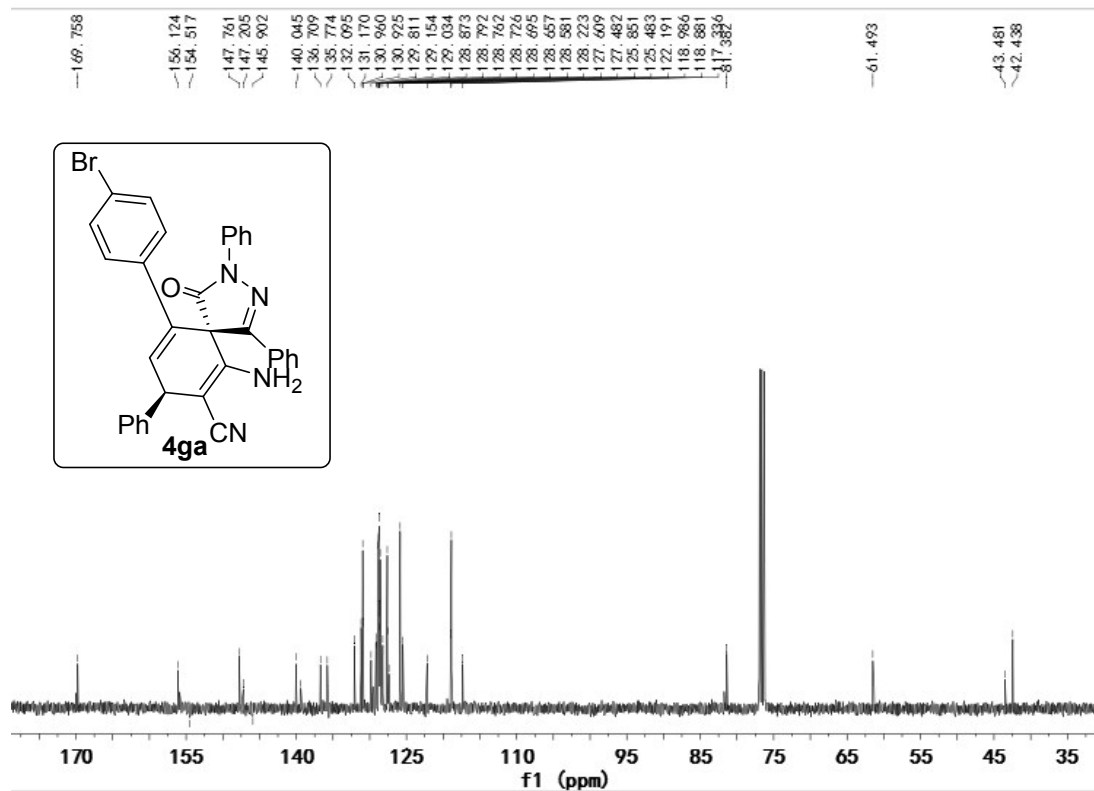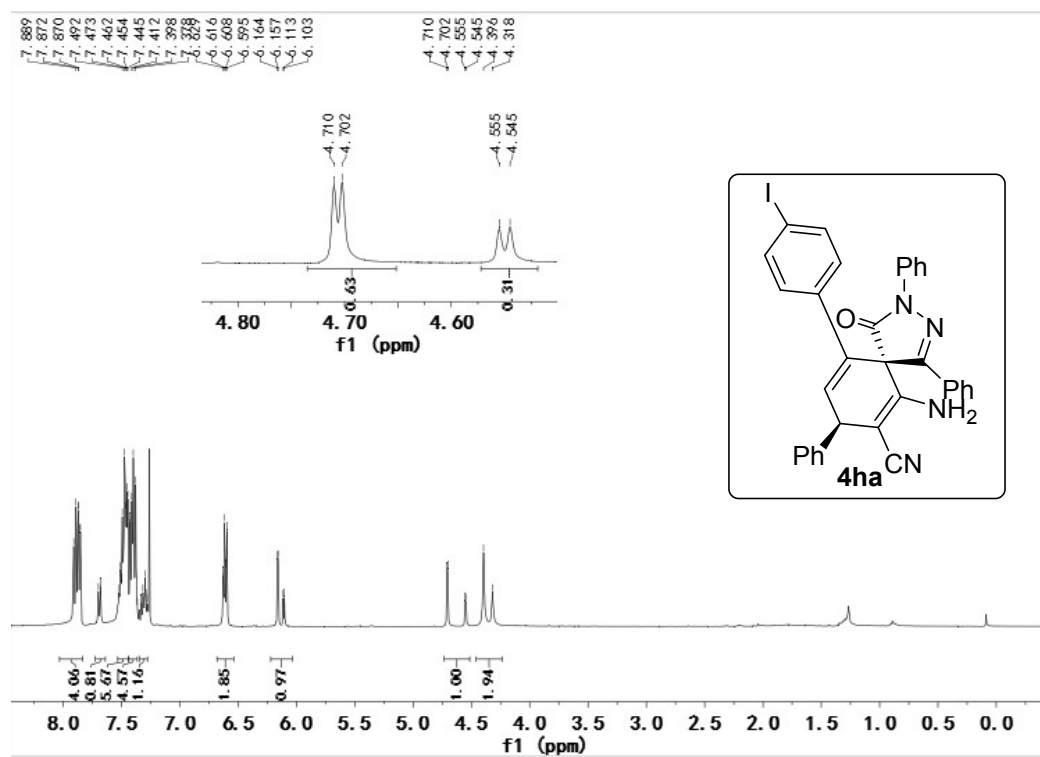

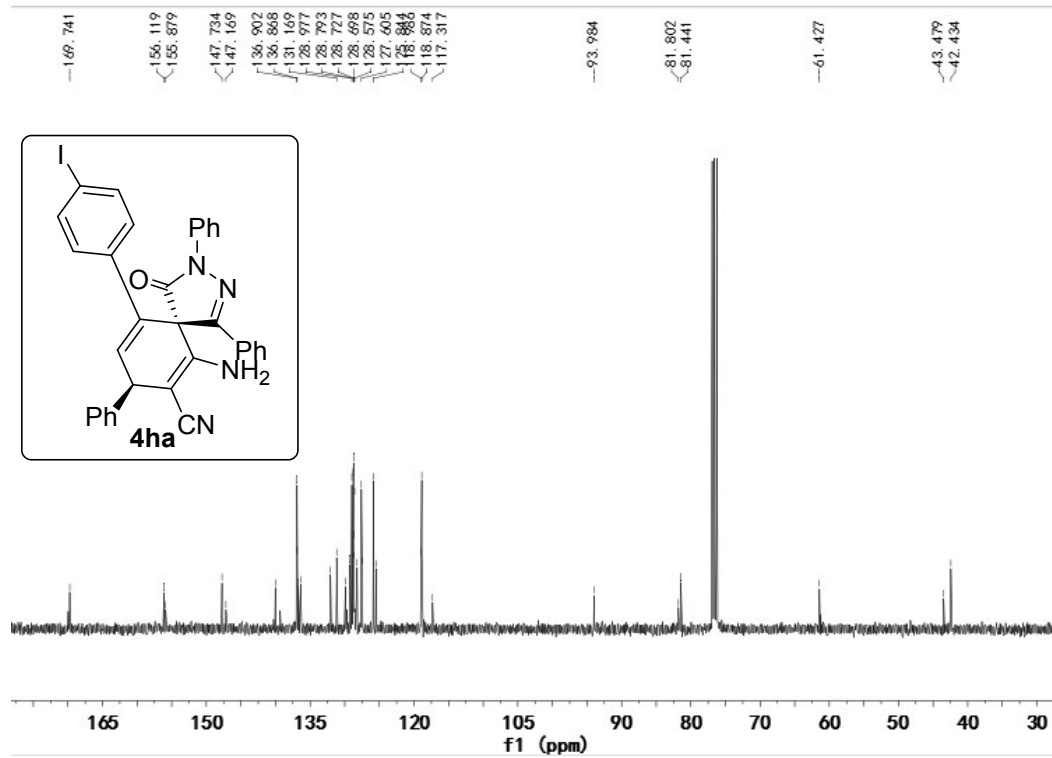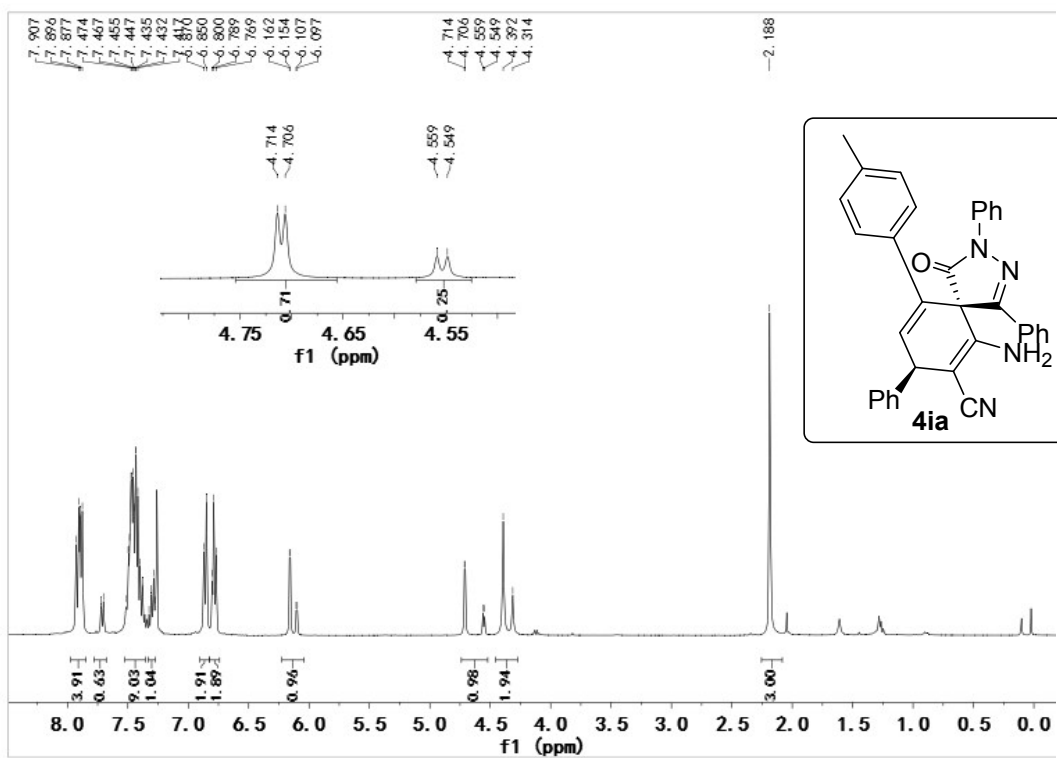

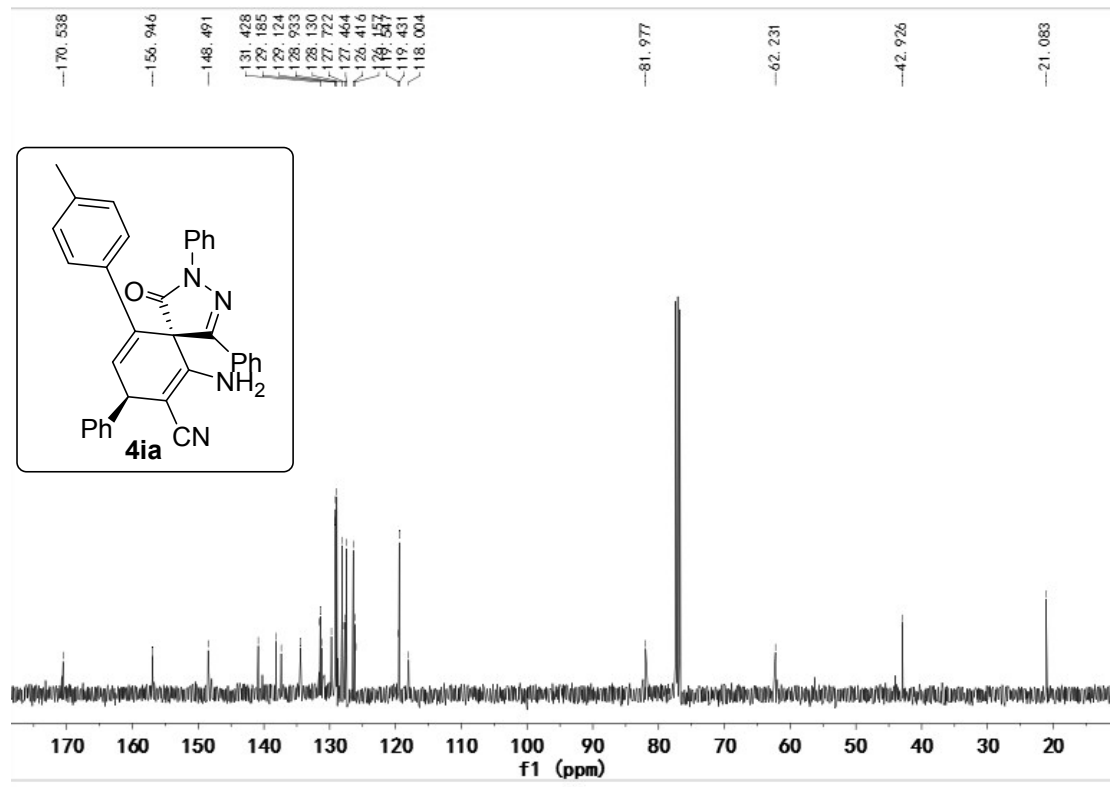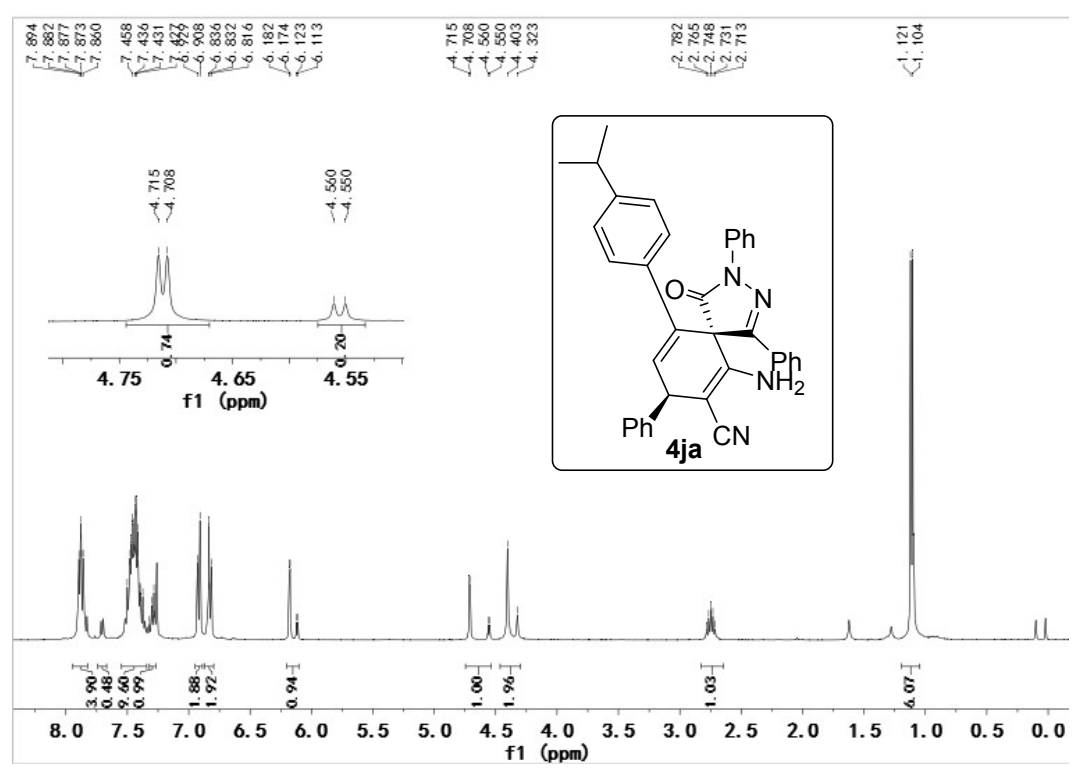

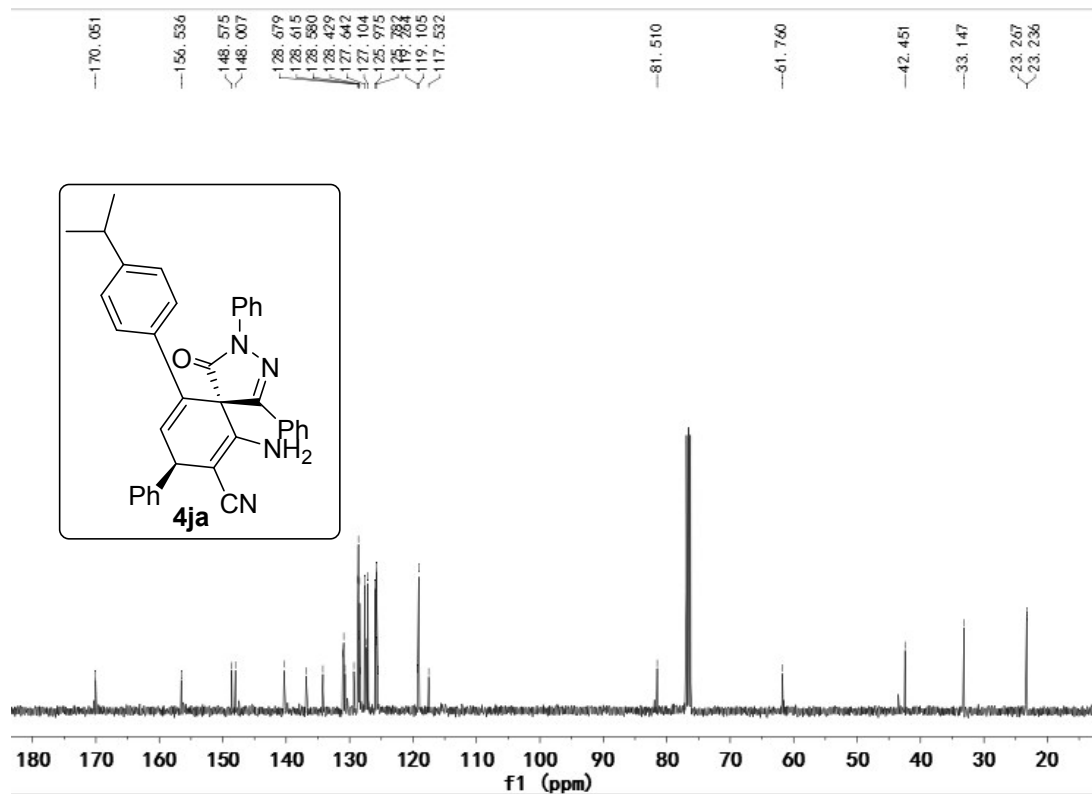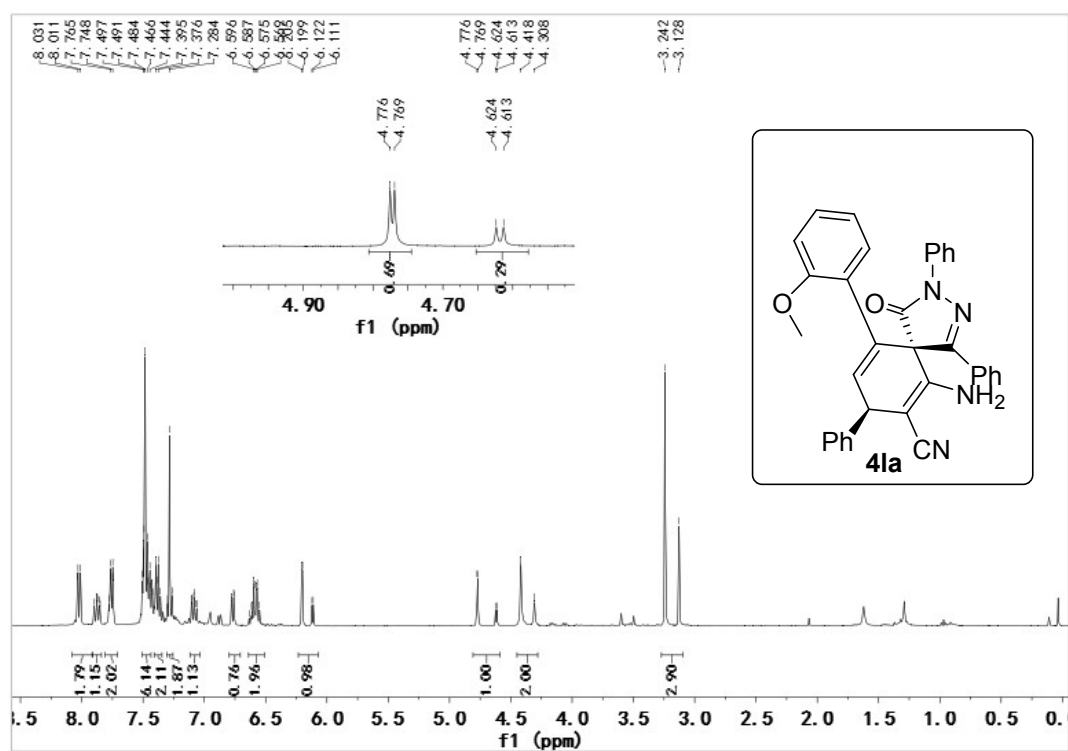

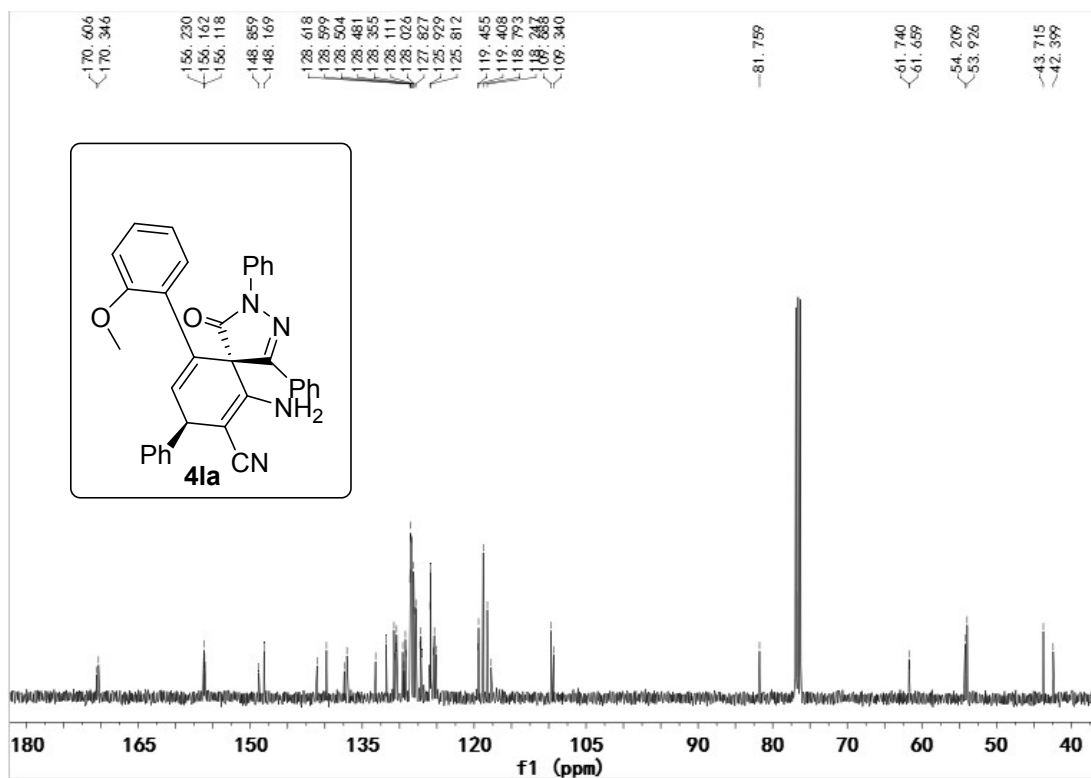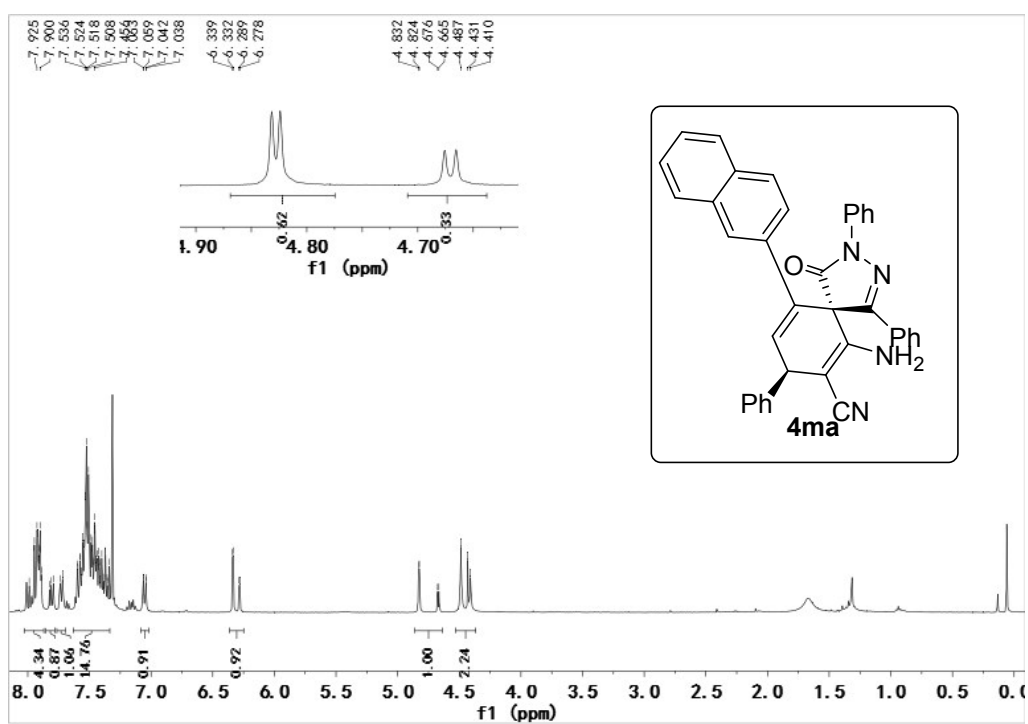

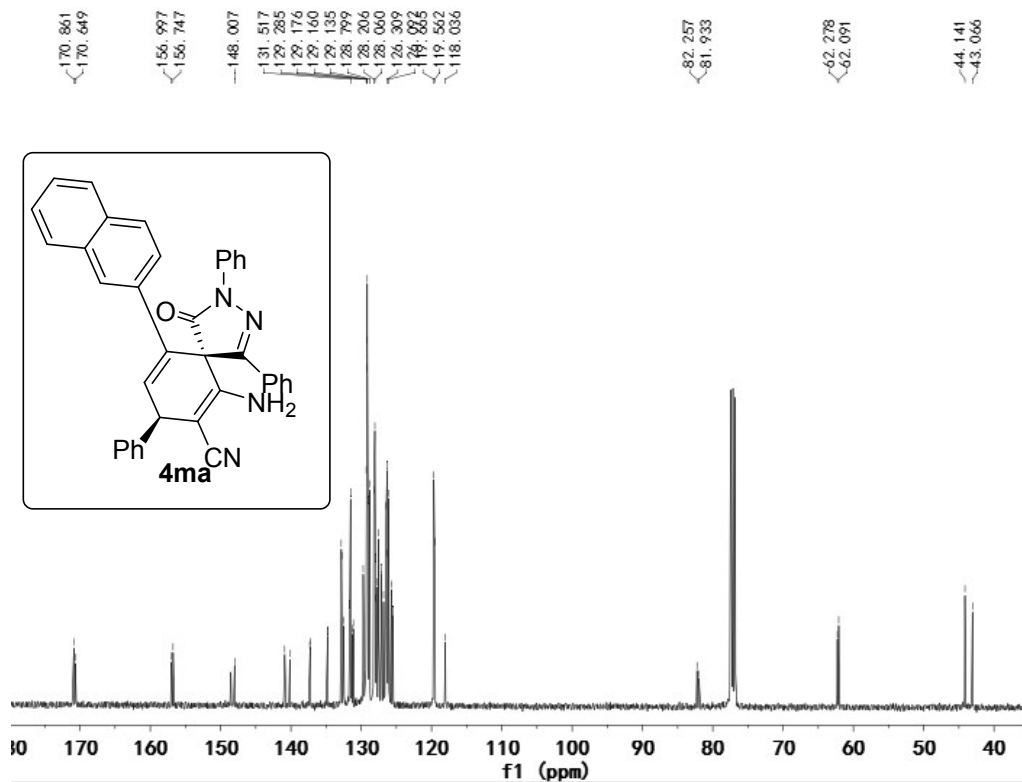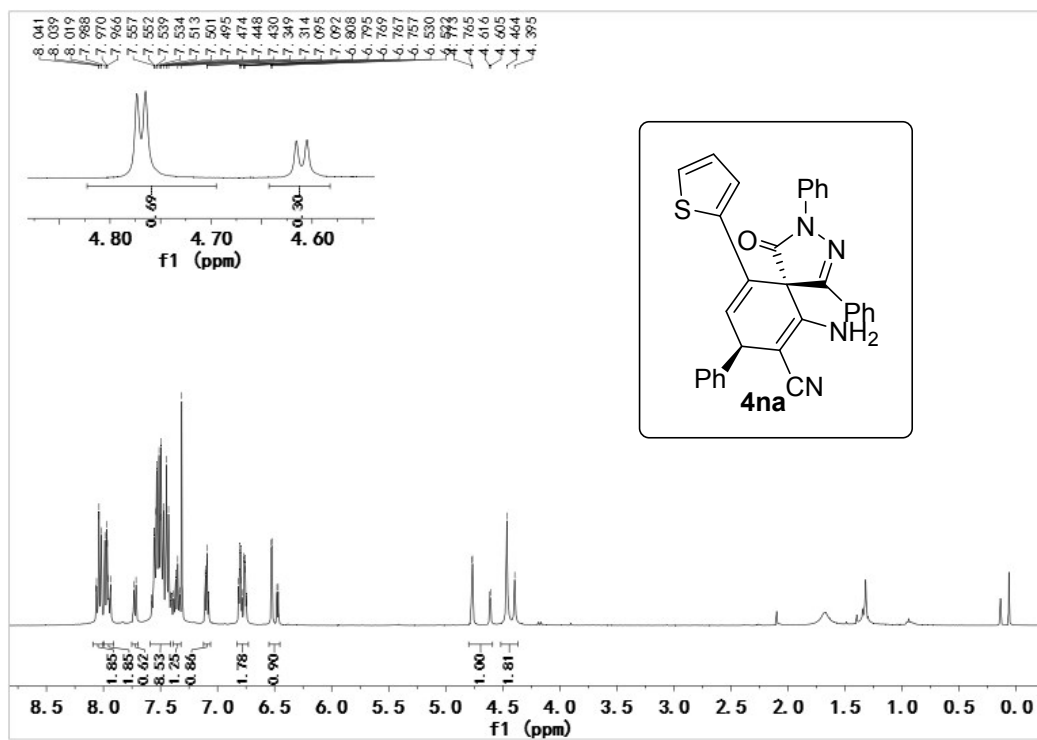

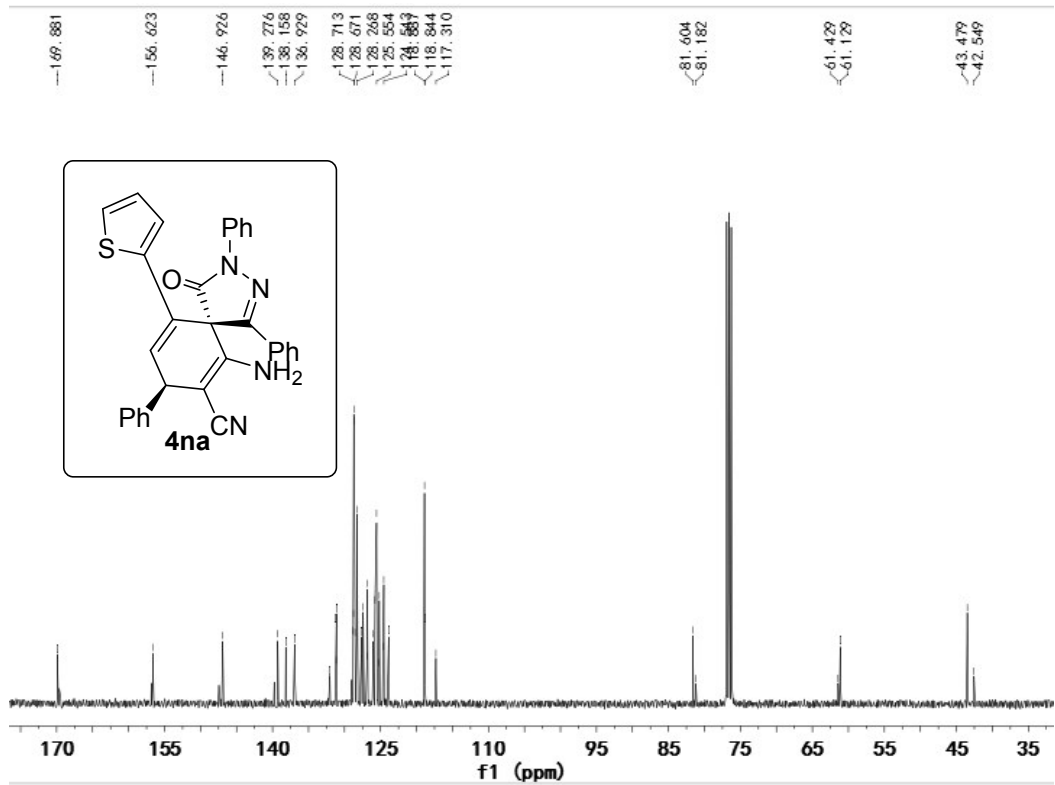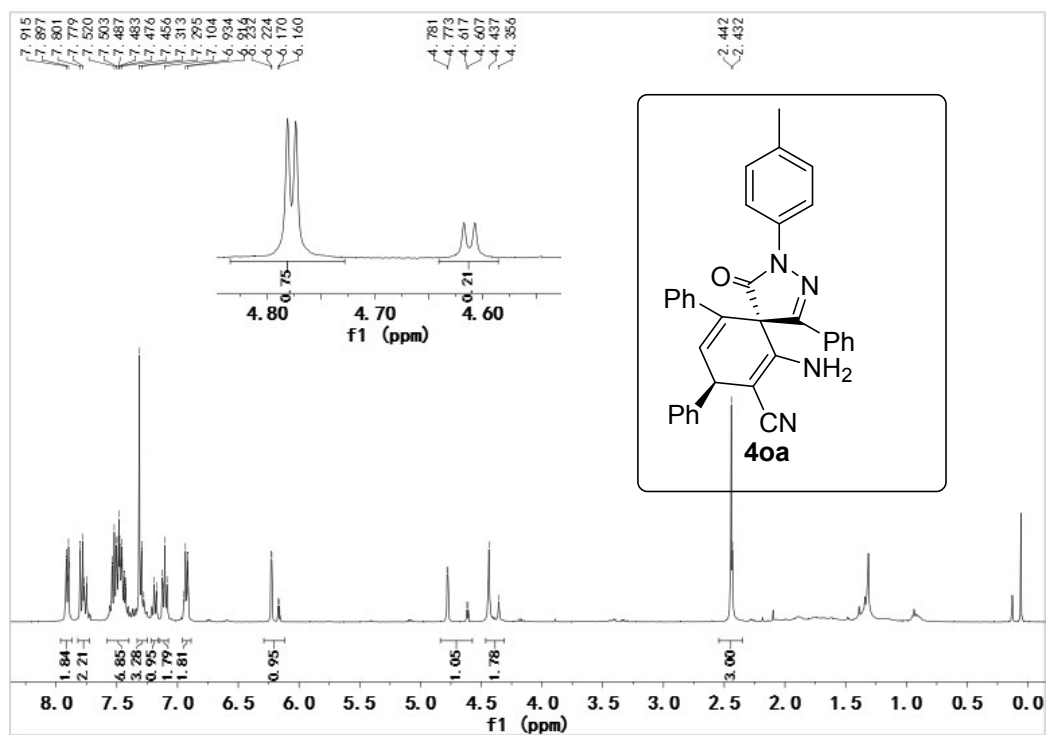

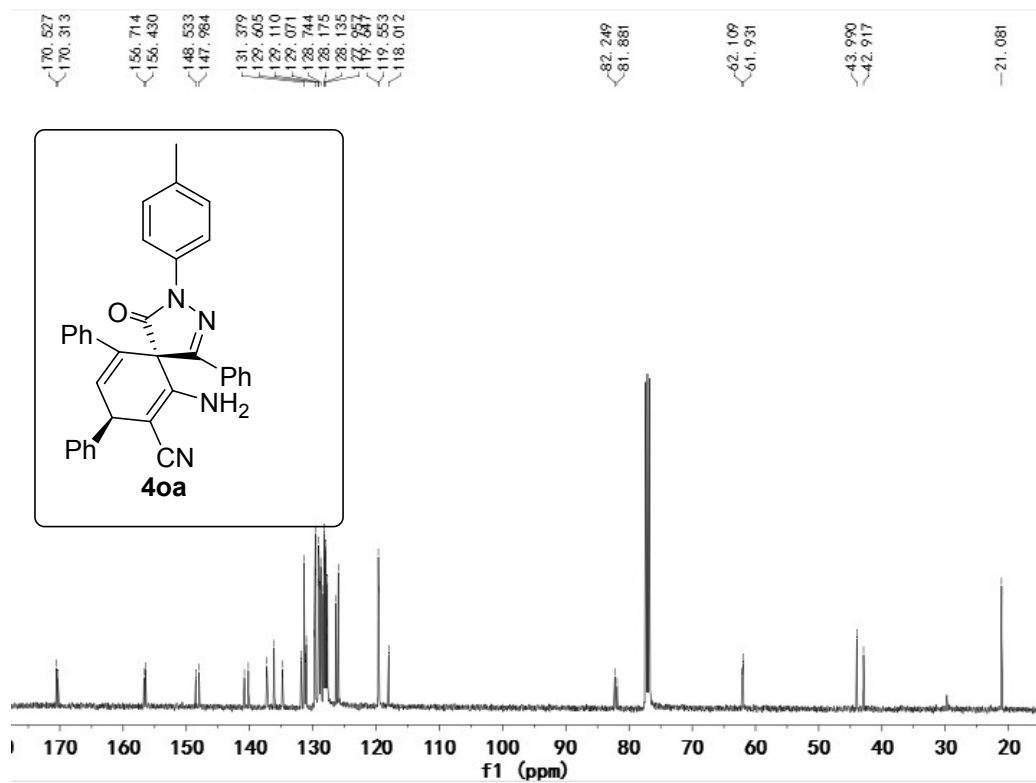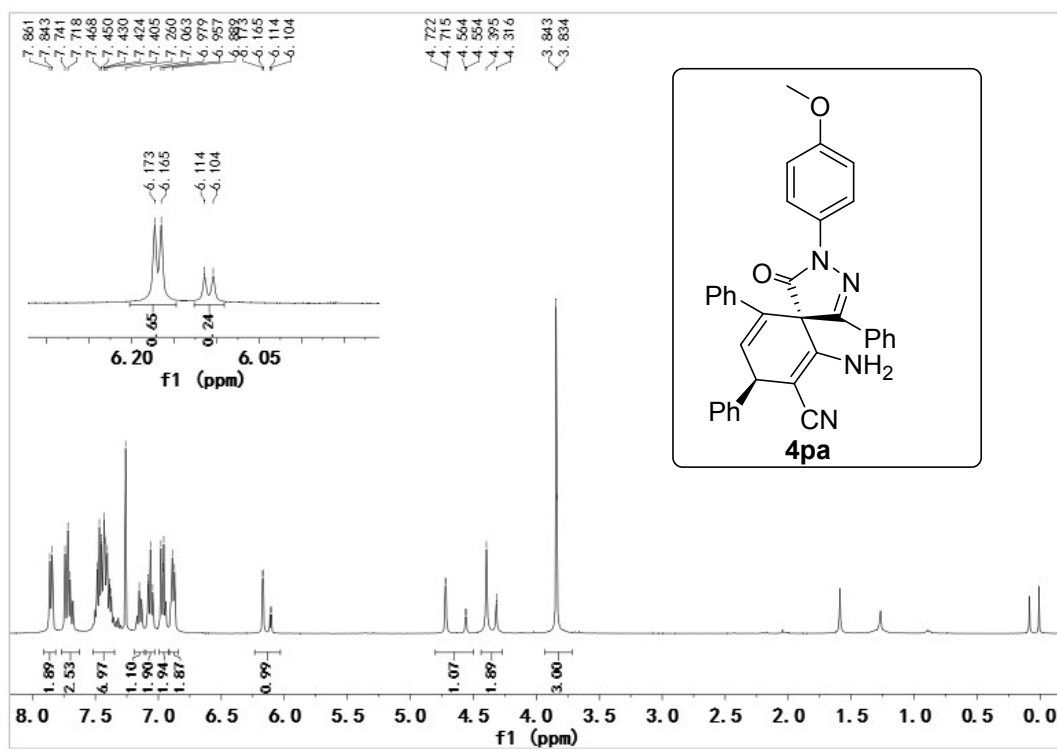



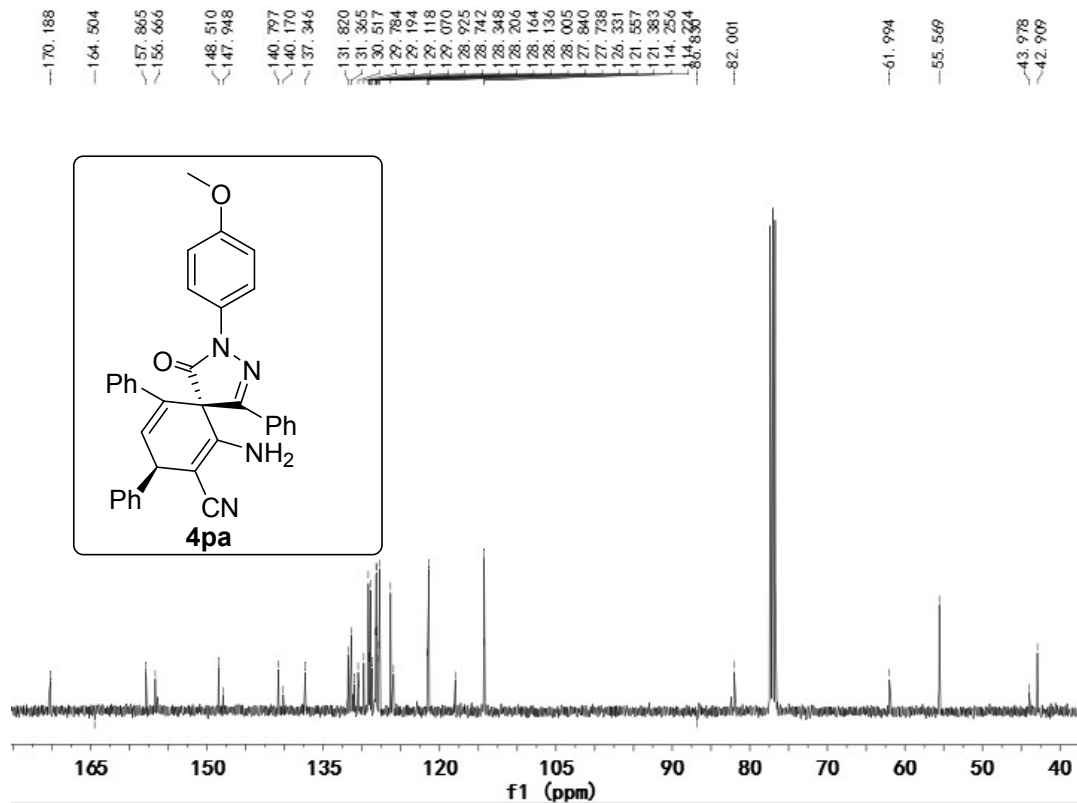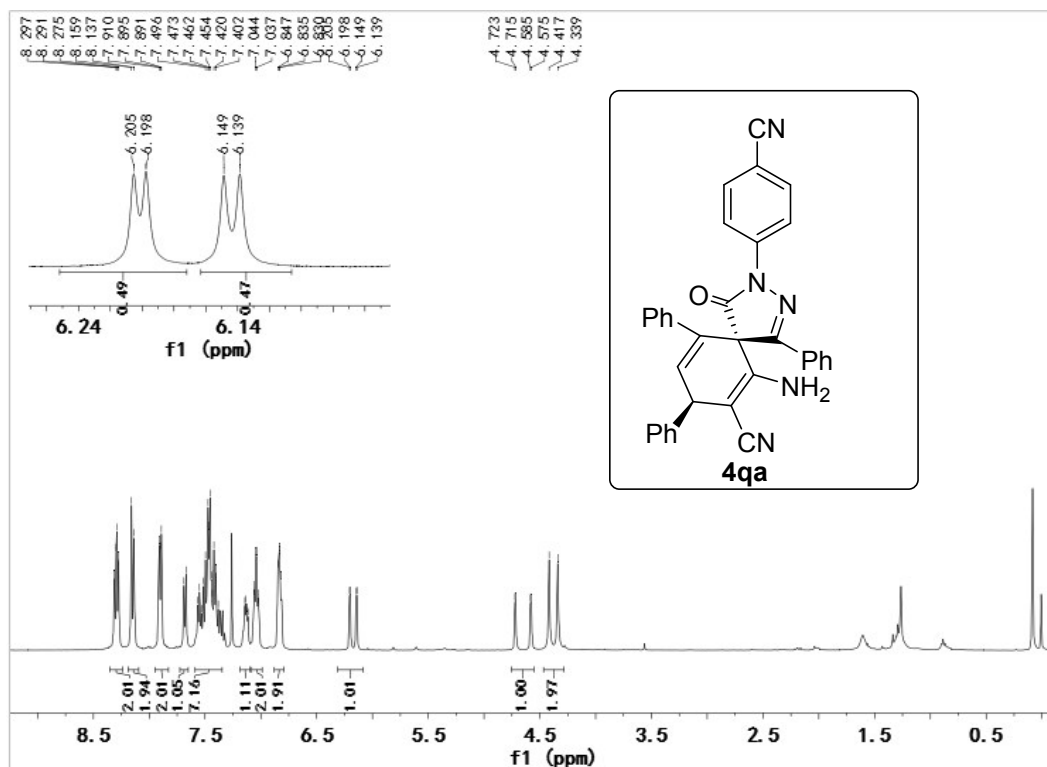

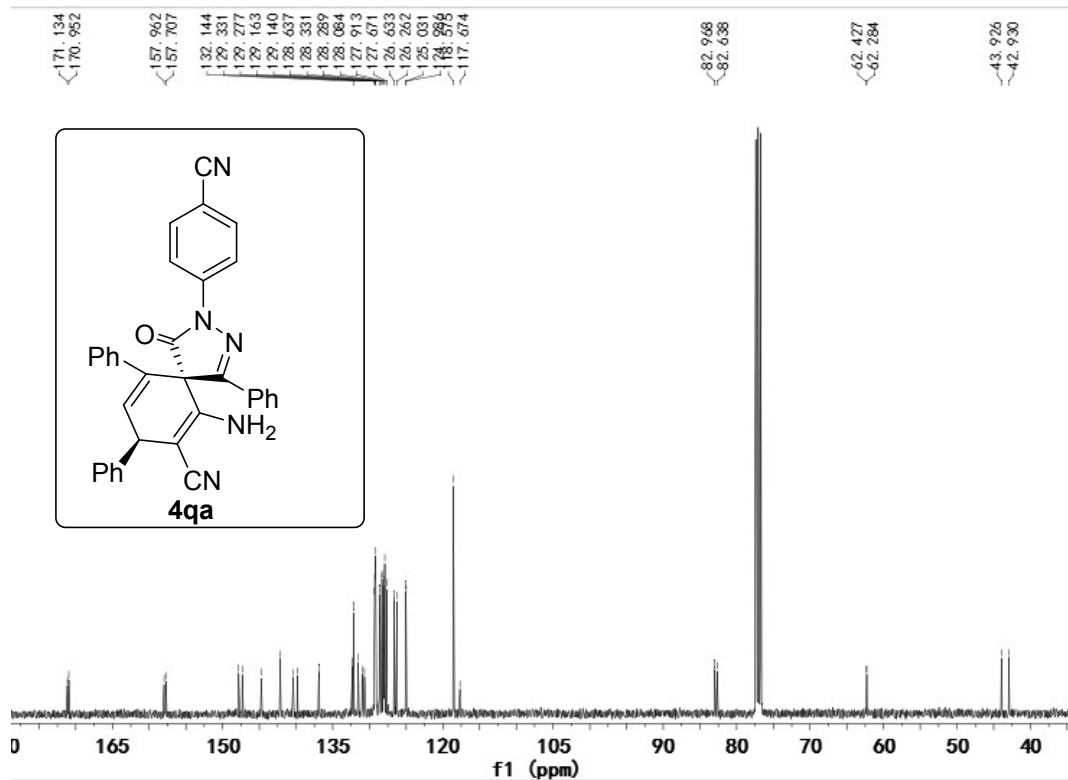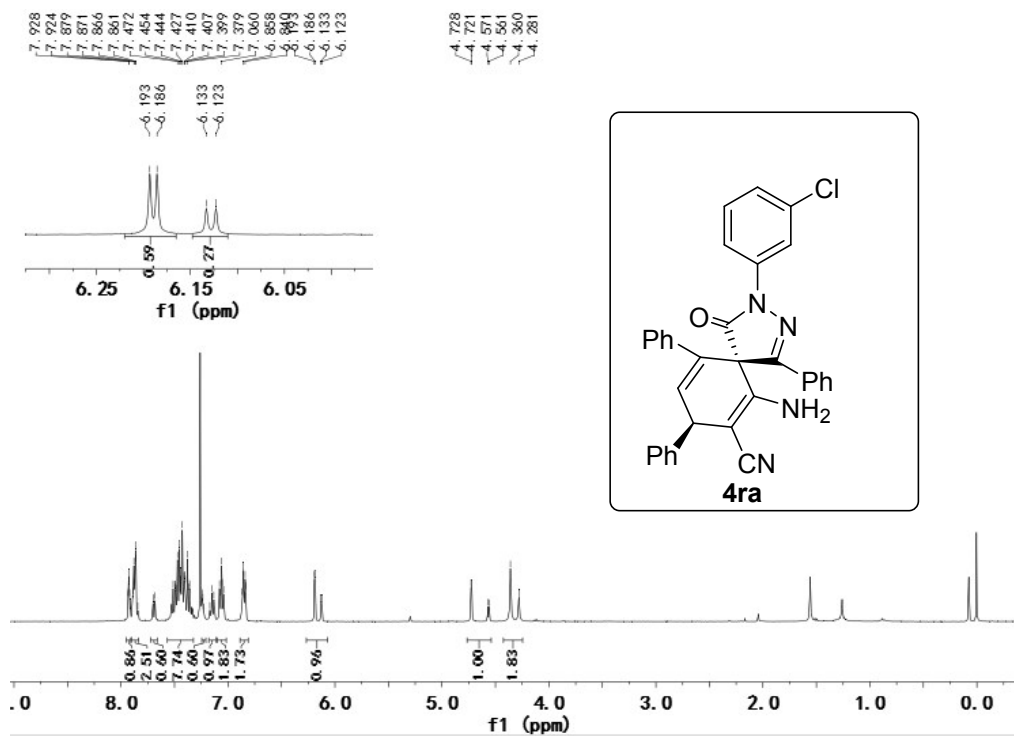

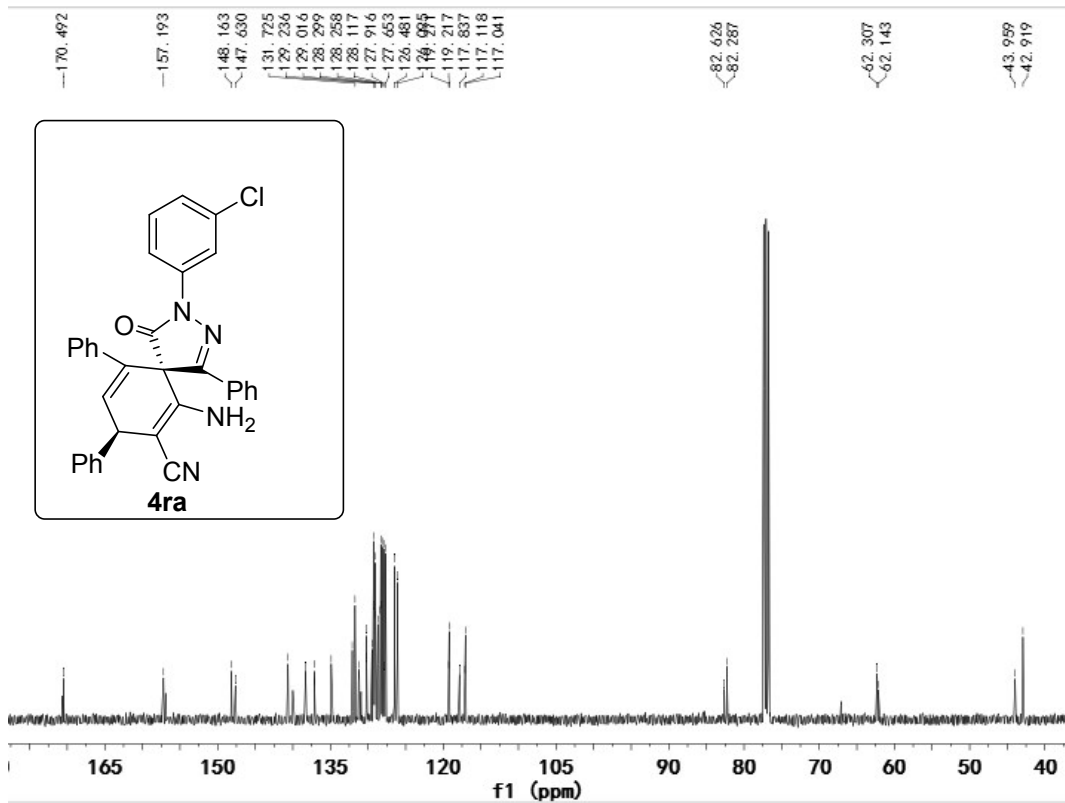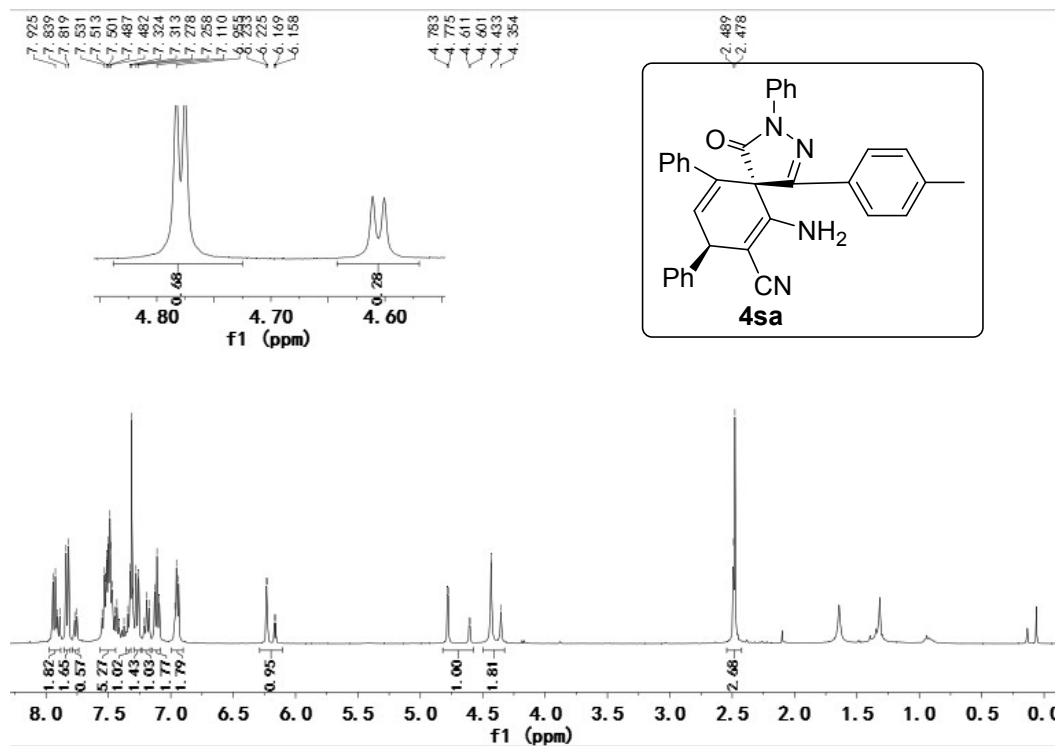

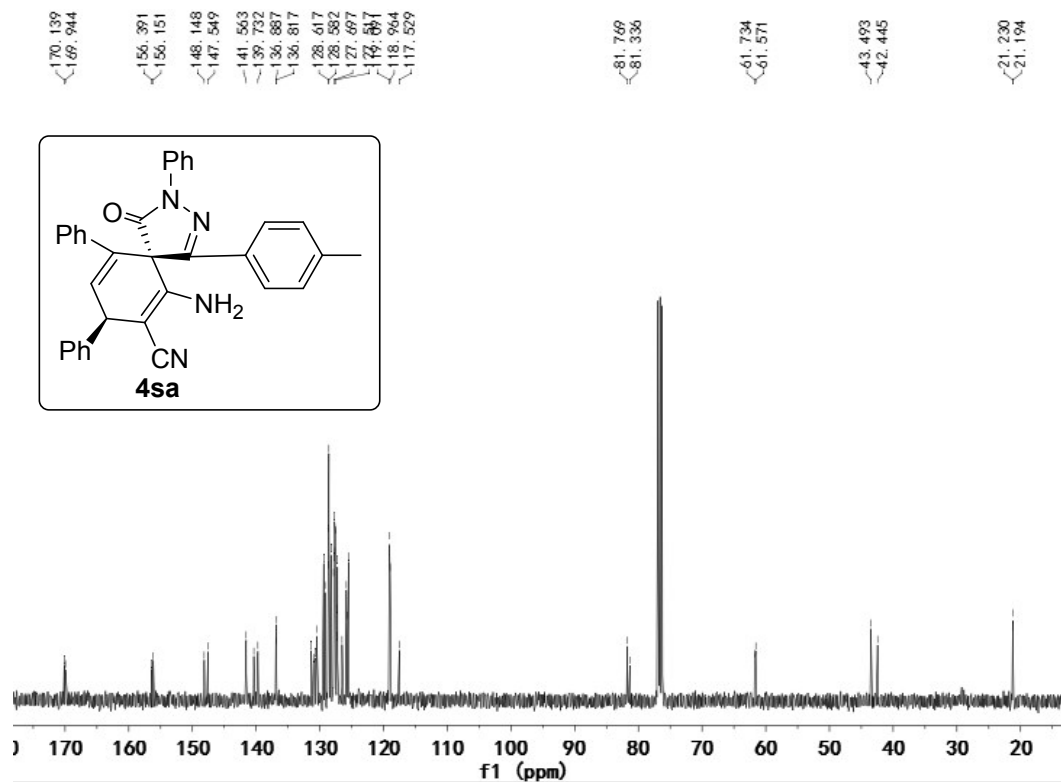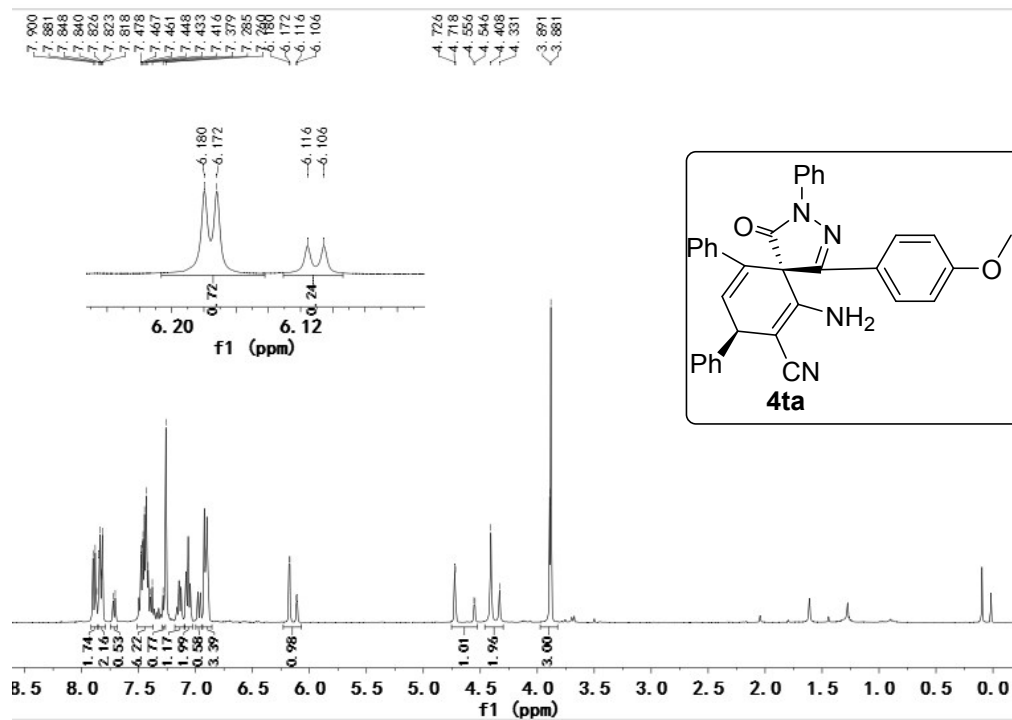

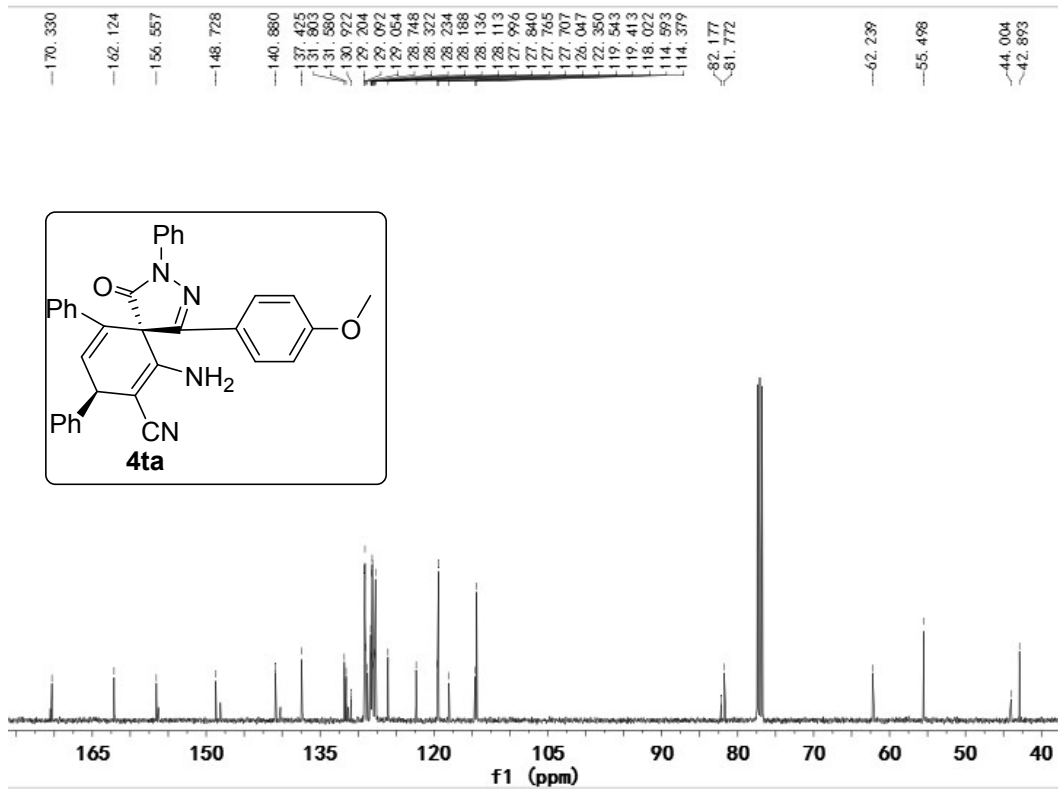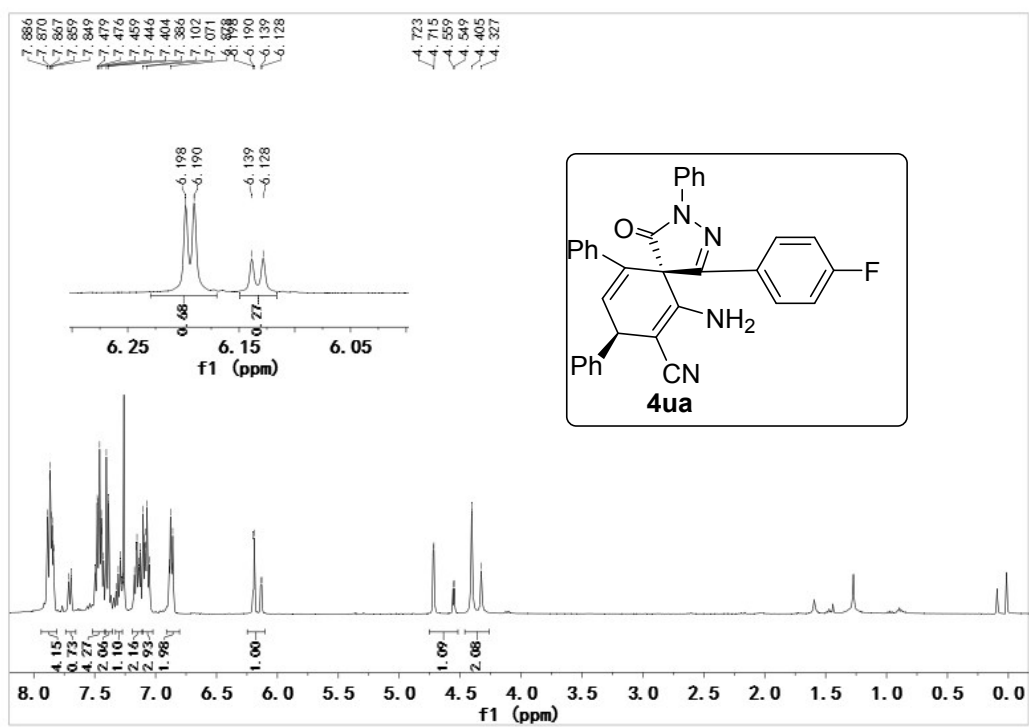

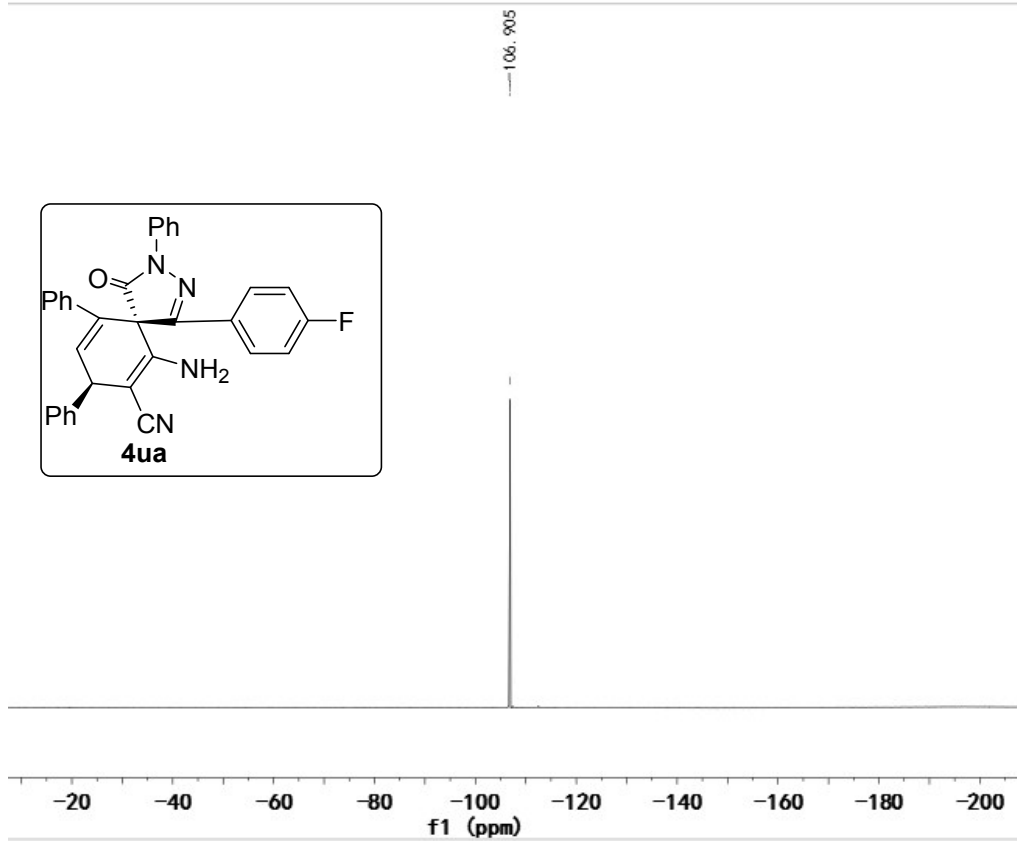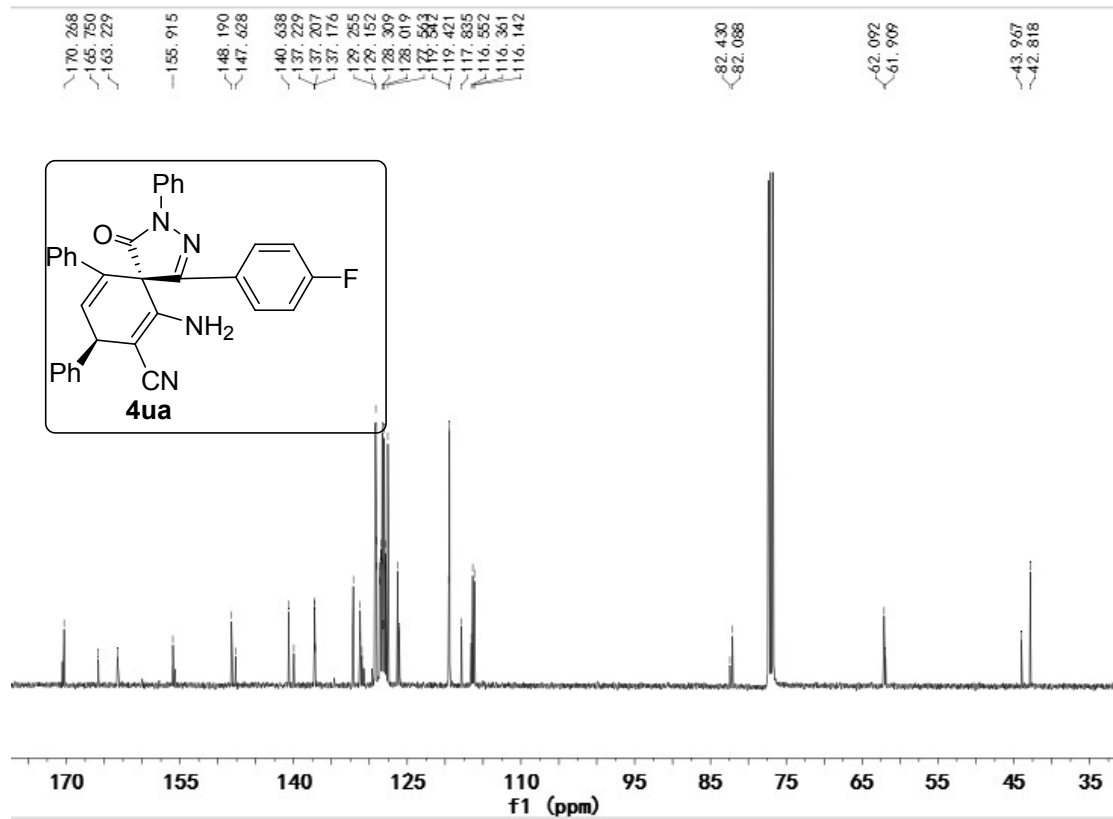

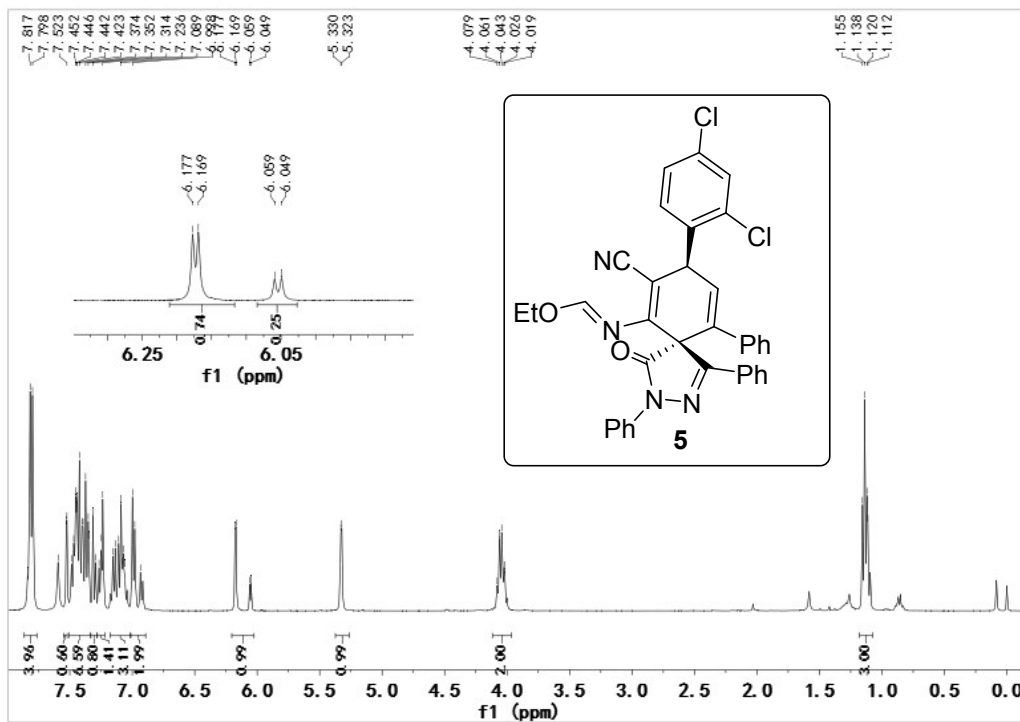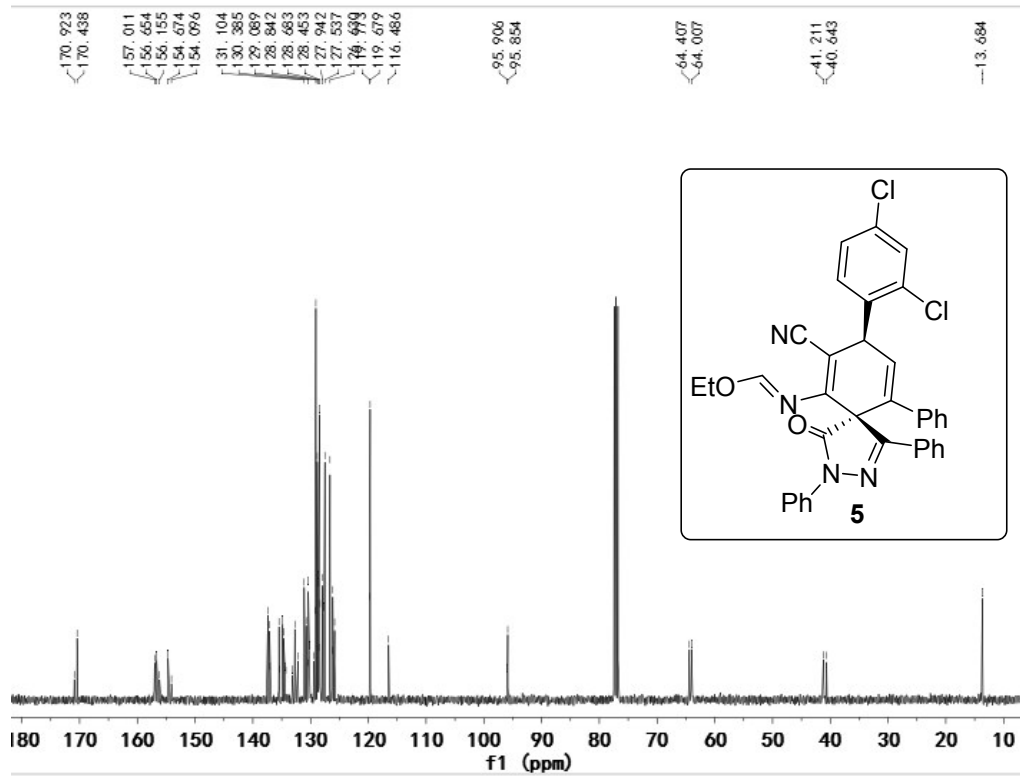

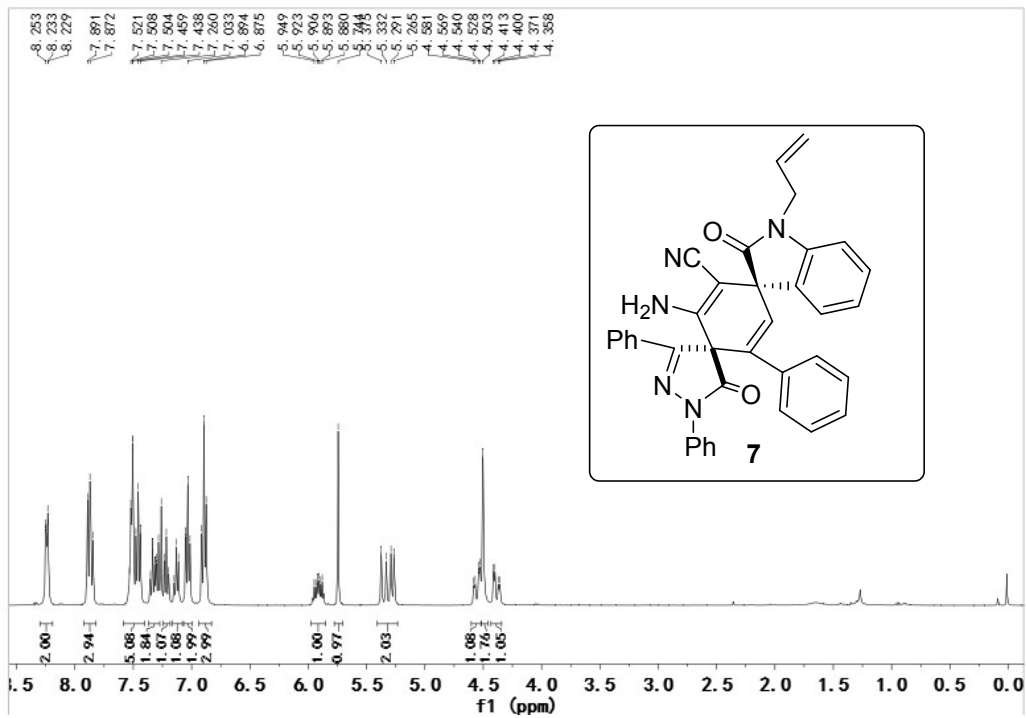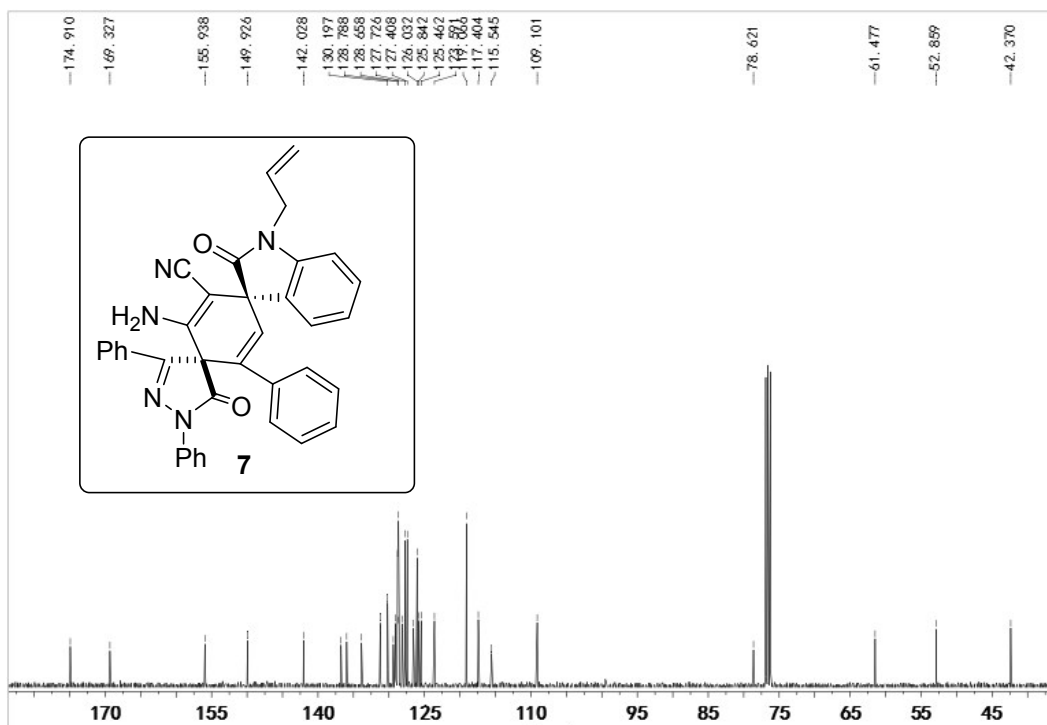



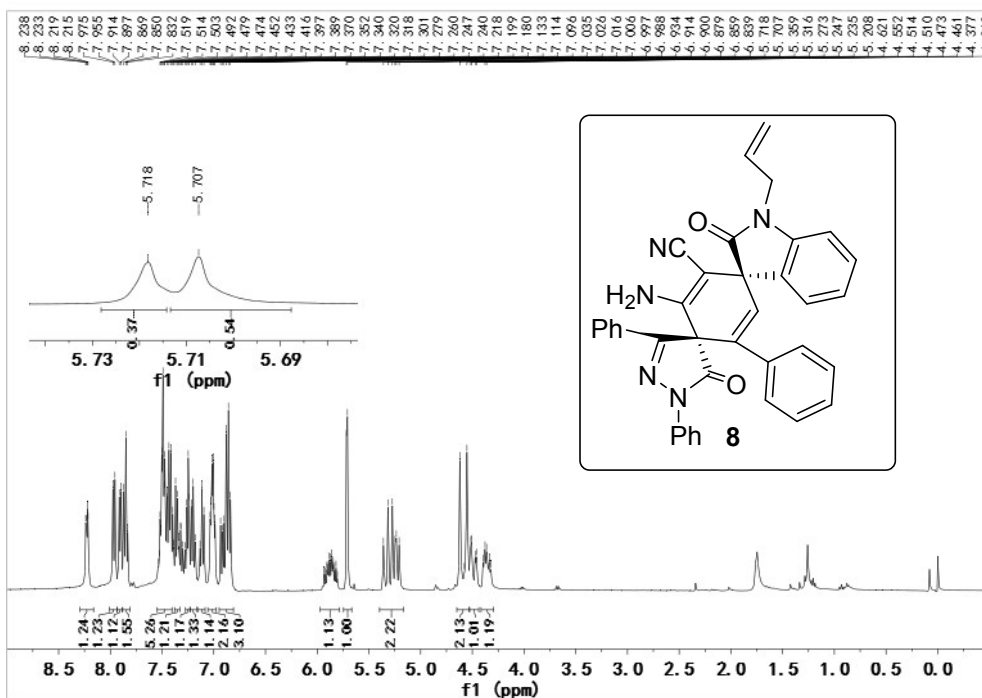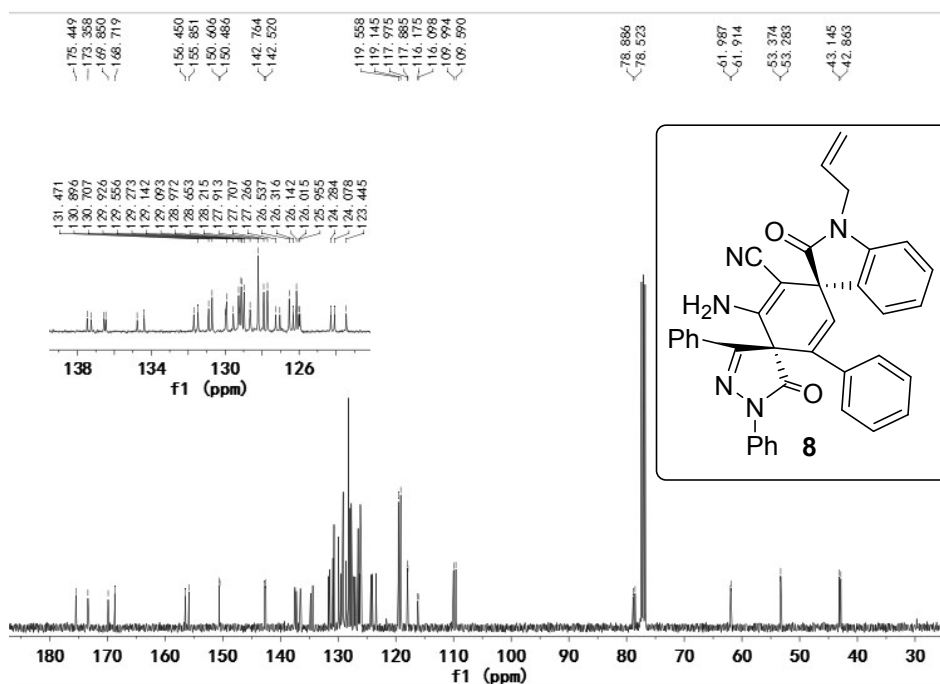

#### 4. HPLC profile spectrum of compounds 4aa

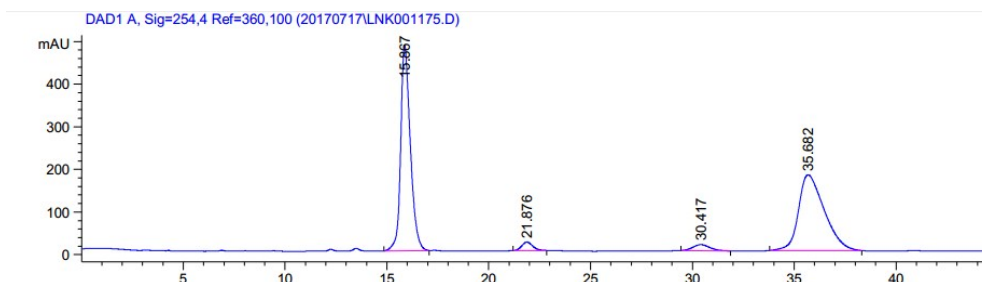

| Peak # | RetTime [min] | Type | Width [min] | Area [mAU*s] | Height [mAU] | Area %  |
|--------|---------------|------|-------------|--------------|--------------|---------|
| 1      | 15.867        | BB   | 0.4962      | 1.58726e4    | 481.97772    | 47.8776 |
| 2      | 21.876        | BB   | 0.5748      | 744.11084    | 19.96746     | 2.2445  |
| 3      | 30.417        | BB   | 0.8674      | 834.63892    | 14.37391     | 2.5176  |
| 4      | 35.682        | BB   | 1.3252      | 1.57011e4    | 177.97485    | 47.3603 |

DAD1 A, Sig=254,4 Ref=360,100 (E:\WXW\DATA\ZHAOMIN\201710

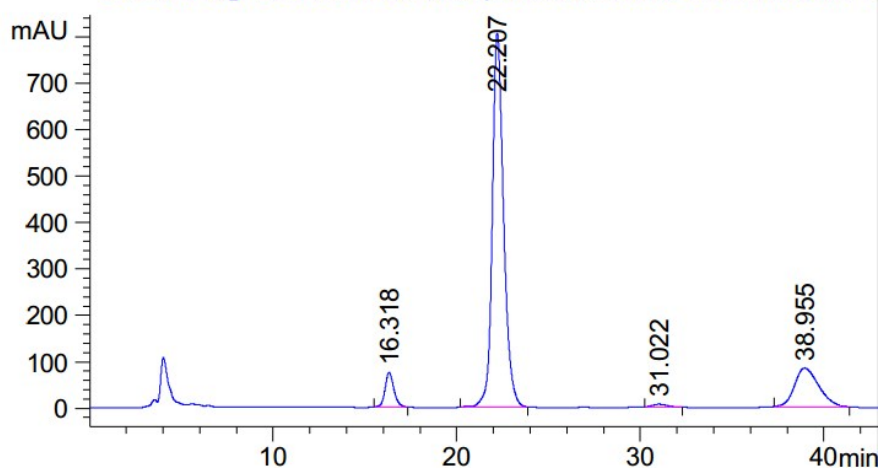

| Peak # | RetTime [min] | Type | Width [min] | Area [mAU*s] | Height [mAU] | Area %  |
|--------|---------------|------|-------------|--------------|--------------|---------|
| 1      | 16.318        | BB   | 0.5110      | 2523.99805   | 74.92770     | 5.5985  |
| 2      | 22.207        | BB   | 0.6457      | 3.44928e4    | 805.25916    | 76.5085 |
| 3      | 31.022        | BB   | 0.7842      | 363.22385    | 6.49716      | 0.8057  |
| 4      | 38.955        | BB   | 1.3881      | 7703.56641   | 83.52045     | 17.0873 |

#### 4ab

DAD1 A, Sig=254,4 Ref=360,100 (20190121\LNK003905.D)

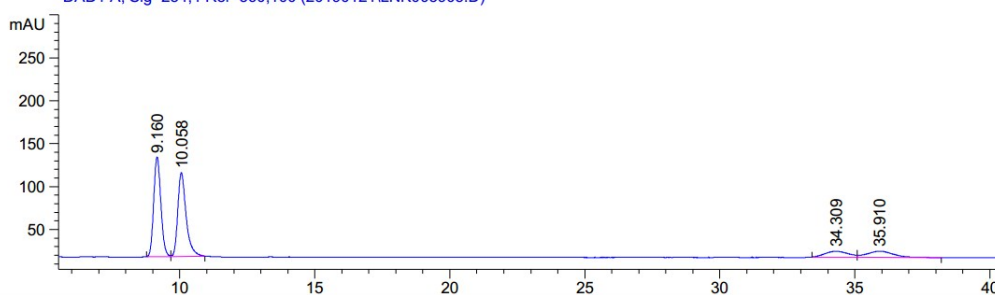

| Peak # | RetTime [min] | Type | Width [min] | Area [mAU*s] | Height [mAU] | Area %  |
|--------|---------------|------|-------------|--------------|--------------|---------|
| 1      | 9.160         | BV   | 0.2871      | 2143.62158   | 116.27102    | 41.8727 |
| 2      | 10.058        | VB   | 0.3255      | 2105.93115   | 97.69395     | 41.1365 |
| 3      | 34.309        | BV   | 0.7115      | 405.56577    | 6.80286      | 7.9222  |
| 4      | 35.910        | VB   | 0.7783      | 464.25400    | 7.08667      | 9.0686  |

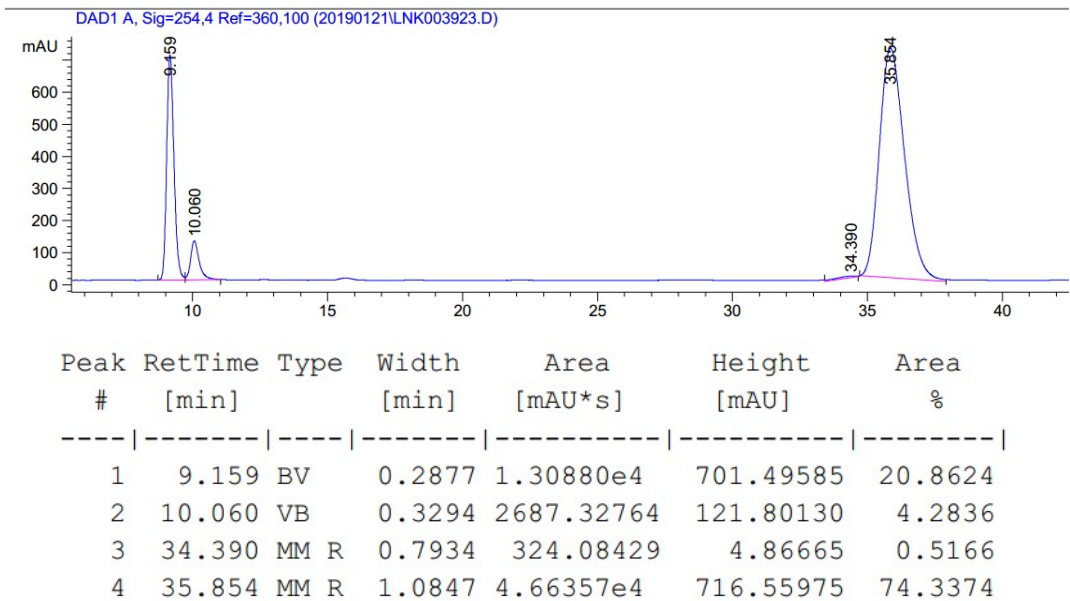

4ac

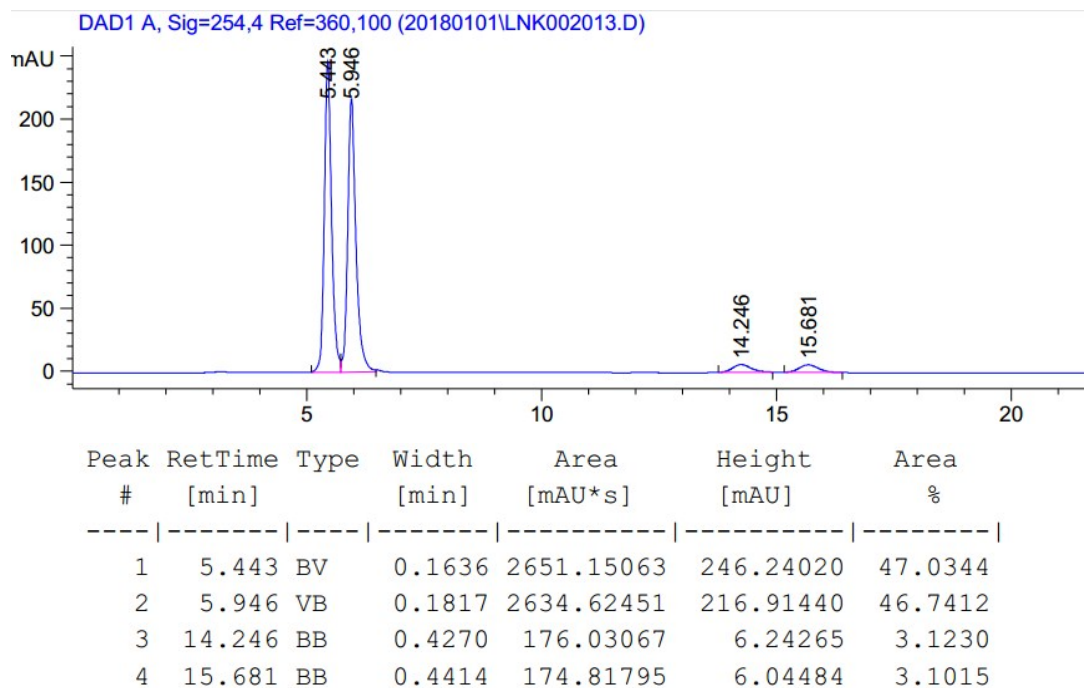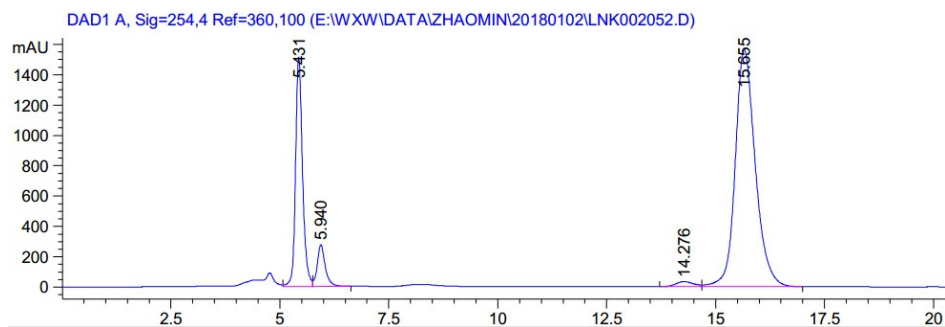

| Peak # | RetTime [min] | Type | Width [min] | Area [mAU*s] | Height [mAU] | Area %  |
|--------|---------------|------|-------------|--------------|--------------|---------|
| 1      | 5.431         | VV   | 0.1678      | 1.68087e4    | 1510.65173   | 23.5400 |
| 2      | 5.940         | VB   | 0.1891      | 3521.86865   | 275.49597    | 4.9322  |
| 3      | 14.276        | BV   | 0.4395      | 984.37726    | 34.02378     | 1.3786  |
| 4      | 15.655        | VB   | 0.4878      | 5.00900e4    | 1563.38293   | 70.1492 |

#### 4ad

DAD1 A, Sig=254,4 Ref=360,100 (E:\WXW\DATA\ZHAOMIN\20171024\LNK001530.D)

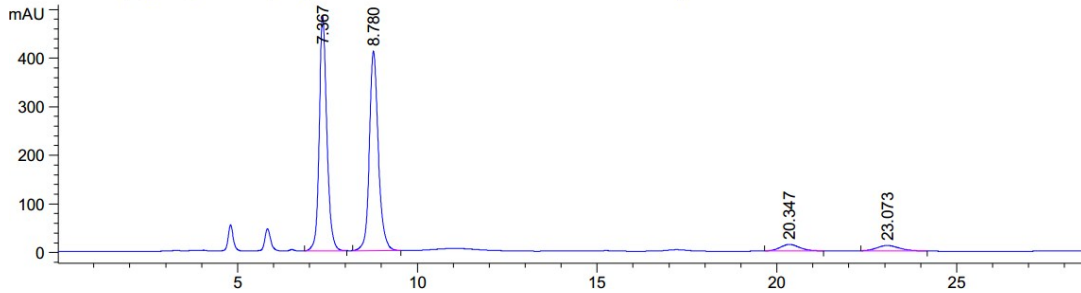

| Peak # | RetTime [min] | Type | Width [min] | Area [mAU*s] | Height [mAU] | Area %  |
|--------|---------------|------|-------------|--------------|--------------|---------|
| 1      | 7.367         | BB   | 0.2222      | 7128.84619   | 482.98984    | 46.7768 |
| 2      | 8.780         | BB   | 0.2601      | 7113.71924   | 410.63330    | 46.6776 |
| 3      | 20.347        | BB   | 0.5714      | 496.16669    | 13.35478     | 3.2557  |
| 4      | 23.073        | BB   | 0.6732      | 501.39774    | 11.26589     | 3.2900  |

DAD1 A, Sig=254,4 Ref=360,100 (E:\WXW\DATA\ZHAOMIN\201801)

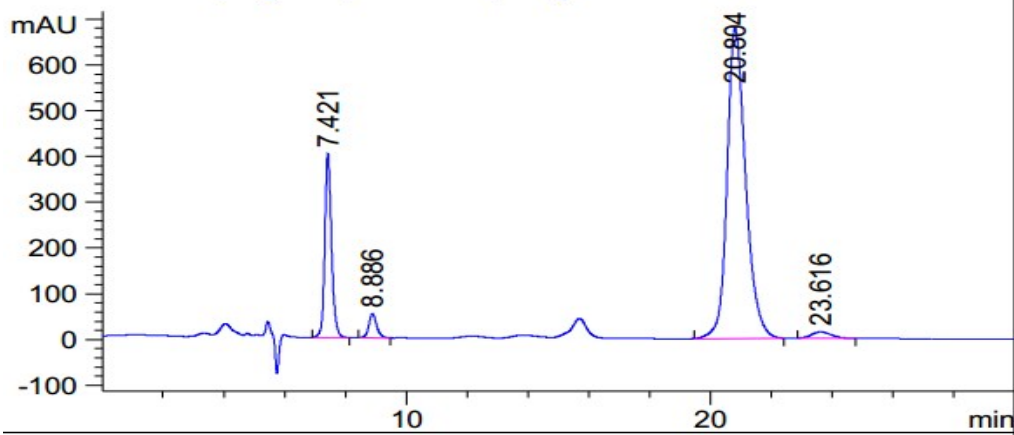

| Peak # | RetTime [min] | Type | Width [min] | Area [mAU*s] | Height [mAU] | Area %  |
|--------|---------------|------|-------------|--------------|--------------|---------|
| 1      | 7.421         | BB   | 0.2295      | 6124.40625   | 402.61902    | 16.7871 |
| 2      | 8.886         | BB   | 0.2710      | 952.25586    | 53.15343     | 2.6102  |
| 3      | 20.804        | BB   | 0.6435      | 2.87763e4    | 677.59387    | 78.8764 |
| 4      | 23.616        | BB   | 0.6977      | 629.79559    | 13.87106     | 1.7263  |

#### 4ae

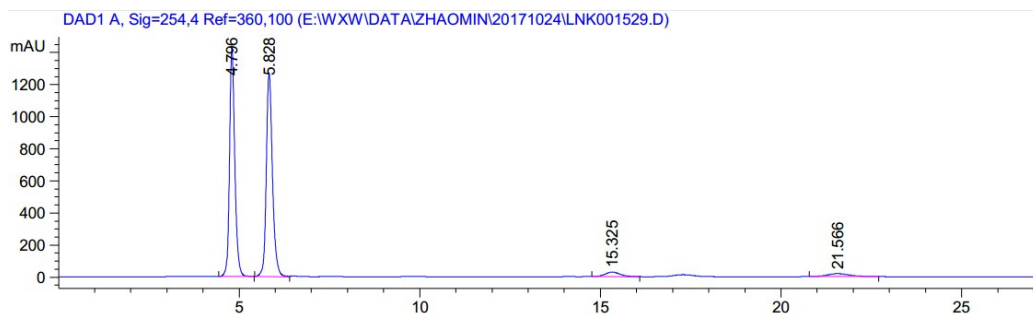

| Peak # | RetTime [min] | Type | Width [min] | Area [mAU*s] | Height [mAU] | Area %  |
|--------|---------------|------|-------------|--------------|--------------|---------|
| 1      | 4.796         | BB   | 0.1553      | 1.45718e4    | 1424.85962   | 47.1377 |
| 2      | 5.828         | BV   | 0.1732      | 1.46770e4    | 1266.39063   | 47.4781 |
| 3      | 15.325        | BB   | 0.4444      | 836.14368    | 28.65454     | 2.7048  |
| 4      | 21.566        | BB   | 0.6777      | 828.30524    | 18.45390     | 2.6794  |

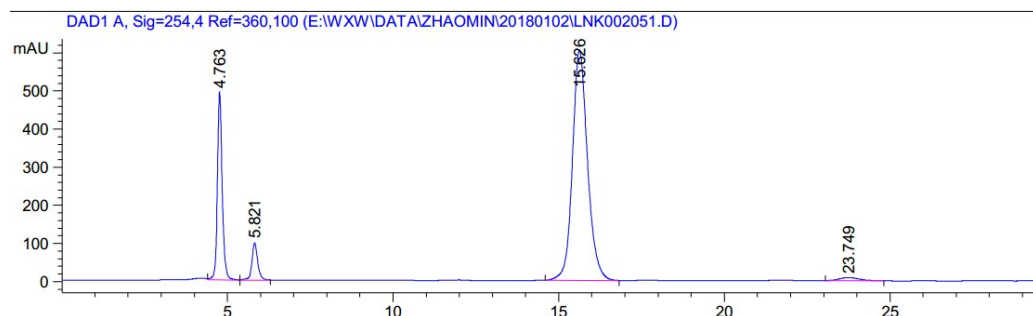

| Peak # | RetTime [min] | Type | Width [min] | Area [mAU*s] | Height [mAU] | Area %  |
|--------|---------------|------|-------------|--------------|--------------|---------|
| 1      | 4.763         | VV   | 0.1523      | 4989.60938   | 492.12366    | 19.4081 |
| 2      | 5.821         | VB   | 0.1830      | 1189.68066   | 97.08310     | 4.6275  |
| 3      | 15.626        | BB   | 0.4824      | 1.91734e4    | 603.94324    | 74.5785 |
| 4      | 23.749        | BB   | 0.6571      | 356.29764    | 8.23003      | 1.3859  |

#### 4an

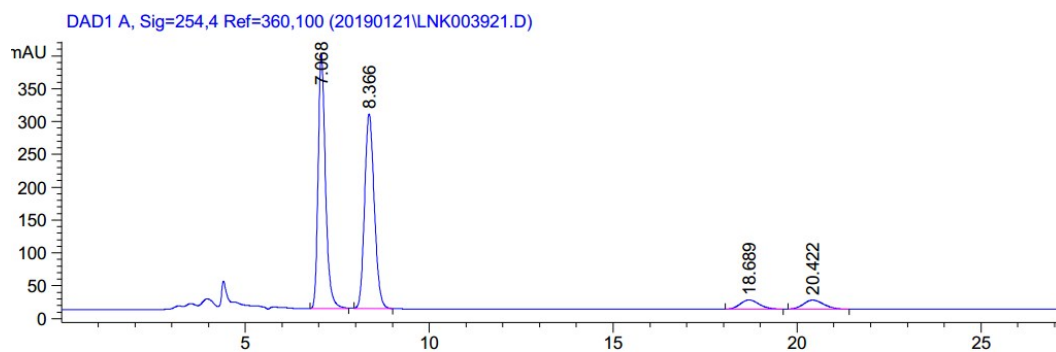

| Peak # | RetTime [min] | Type | Width [min] | Area [mAU*s] | Height [mAU] | Area %  |
|--------|---------------|------|-------------|--------------|--------------|---------|
| 1      | 7.068         | BB   | 0.2125      | 5395.79980   | 387.33557    | 45.5139 |
| 2      | 8.366         | BB   | 0.2835      | 5429.60303   | 296.76395    | 45.7991 |
| 3      | 18.689        | BB   | 0.5445      | 501.67517    | 13.98667     | 4.2317  |
| 4      | 20.422        | BB   | 0.5572      | 528.18927    | 13.71792     | 4.4553  |

DAD1 A, Sig=254,4 Ref=360,100 (20190121\LNK003922.D)

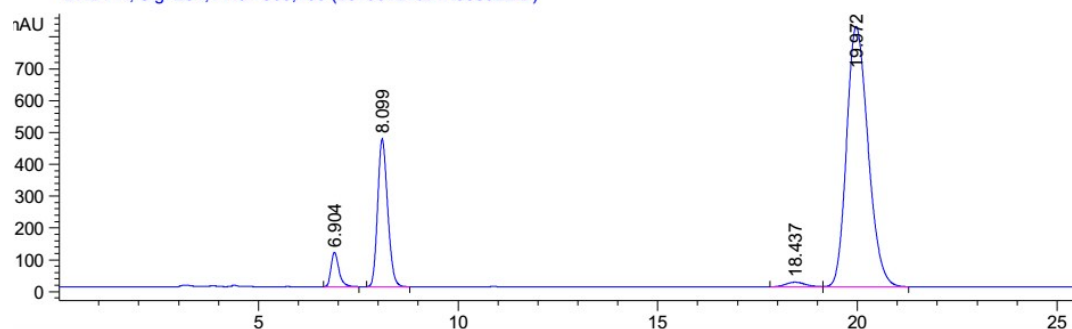

| Peak # | RetTime [min] | Type | Width [min] | Area [mAU*s] | Height [mAU] | Area %  |
|--------|---------------|------|-------------|--------------|--------------|---------|
| 1      | 6.904         | BB   | 0.2090      | 1498.06665   | 108.58165    | 3.6816  |
| 2      | 8.099         | BB   | 0.2692      | 8110.86230   | 465.60507    | 19.9329 |
| 3      | 18.437        | BV   | 0.5054      | 490.12799    | 14.53590     | 1.2045  |
| 4      | 19.972        | VB   | 0.5824      | 3.05918e4    | 817.76996    | 75.1810 |

4af

DAD1 A, Sig=254,4 Ref=360,100 (20180102\LNK002065.D)

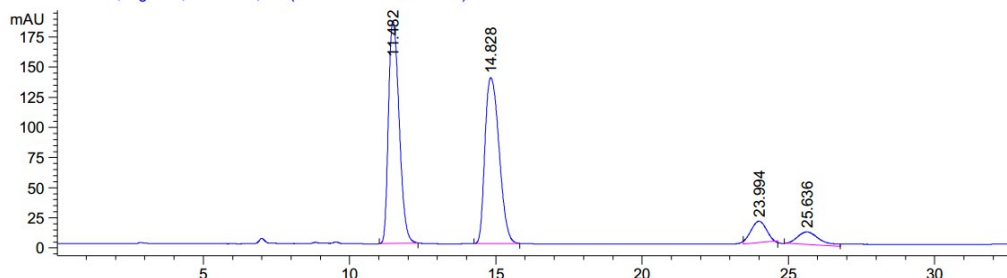

| Peak # | RetTime [min] | Type | Width [min] | Area [mAU*s] | Height [mAU] | Area %  |
|--------|---------------|------|-------------|--------------|--------------|---------|
| 1      | 11.482        | BB   | 0.4056      | 4707.91162   | 184.54274    | 44.7538 |
| 2      | 14.828        | BB   | 0.5405      | 4635.83740   | 137.80353    | 44.0687 |
| 3      | 23.994        | MM R | 0.6060      | 647.78247    | 17.81682     | 6.1579  |
| 4      | 25.636        | MM R | 0.8577      | 528.04858    | 10.26103     | 5.0197  |

DAD1 A, Sig=254,4 Ref=360,100 (E:\WXW\DATA\ZHAOMIN\20180

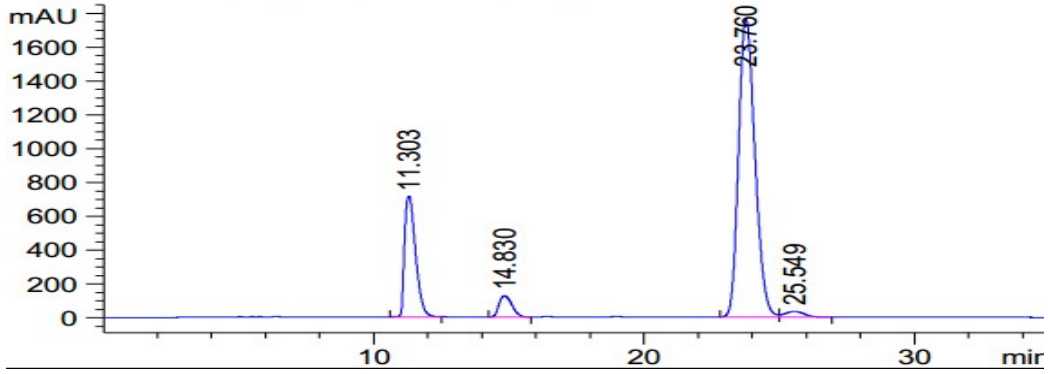

| Peak # | RetTime [min] | Type | Width [min] | Area [mAU*s] | Height [mAU] | Area %  |
|--------|---------------|------|-------------|--------------|--------------|---------|
| 1      | 11.303        | BB   | 0.4370      | 2.01140e4    | 713.36975    | 20.0667 |
| 2      | 14.830        | BB   | 0.5359      | 4130.03467   | 124.23204    | 4.1203  |
| 3      | 23.760        | BV   | 0.6589      | 7.42989e4    | 1758.43665   | 74.1243 |
| 4      | 25.549        | VB   | 0.7625      | 1692.61707   | 34.13572     | 1.6886  |

4ai

DAD1 A, Sig=254,4 Ref=360,100 (E:\WXW\DATA\ZHAOMIN\20180228\LNK002214.D)

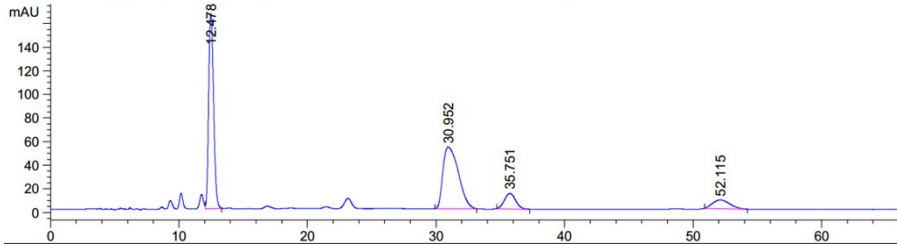

| Peak # | RetTime [min] | Type | Width [min] | Area [mAU*s] | Height [mAU] | Area %  |
|--------|---------------|------|-------------|--------------|--------------|---------|
| 1      | 12.478        | VB   | 0.4223      | 4393.02539   | 165.16379    | 42.7937 |
| 2      | 30.952        | BB   | 1.2091      | 4389.38428   | 52.30492     | 42.7582 |
| 3      | 35.751        | BB   | 0.8712      | 797.13763    | 13.18797     | 7.7651  |
| 4      | 52.115        | BB   | 1.1138      | 686.04248    | 7.34398      | 6.6829  |

DAD1 A, Sig=254,4 Ref=360,100 (E:\WXW\DATA\ZHAOMIN\20180228\LNK002215.D)

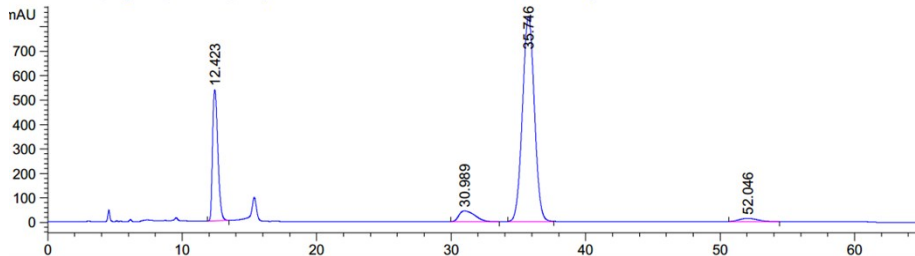

| Peak # | RetTime [min] | Type | Width [min] | Area [mAU*s] | Height [mAU] | Area %  |
|--------|---------------|------|-------------|--------------|--------------|---------|
| 1      | 12.423        | BB   | 0.4347      | 1.47417e4    | 536.30328    | 20.6591 |
| 2      | 30.989        | BB   | 1.3416      | 3590.62329   | 43.93037     | 5.0319  |
| 3      | 35.746        | BB   | 0.9690      | 5.17407e4    | 839.52179    | 72.5097 |
| 4      | 52.046        | BB   | 1.3987      | 1283.90503   | 13.15385     | 1.7993  |

4aj

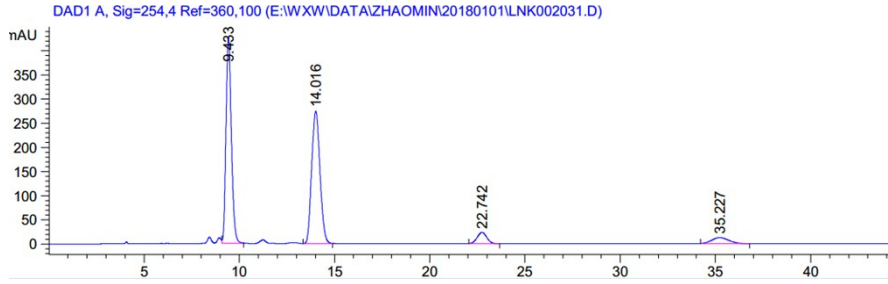

| Peak # | RetTime [min] | Type | Width [min] | Area [mAU*s] | Height [mAU] | Area %  |
|--------|---------------|------|-------------|--------------|--------------|---------|
| 1      | 9.433         | VB   | 0.3045      | 8358.18848   | 426.80356    | 45.7421 |
| 2      | 14.016        | VB   | 0.4819      | 8314.65332   | 274.09131    | 45.5038 |
| 3      | 22.742        | BB   | 0.5377      | 821.15259    | 23.38254     | 4.4939  |
| 4      | 35.227        | BB   | 0.8692      | 778.42487    | 12.48856     | 4.2601  |

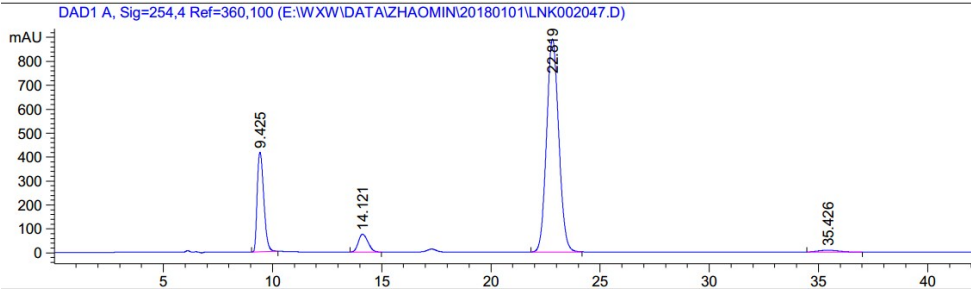

| Peak # | RetTime [min] | Type | Width [min] | Area [mAU*s] | Height [mAU] | Area %  |
|--------|---------------|------|-------------|--------------|--------------|---------|
| 1      | 9.425         | BB   | 0.3303      | 8719.50781   | 416.38519    | 18.9385 |
| 2      | 14.121        | BB   | 0.4893      | 2297.96191   | 74.61008     | 4.9911  |
| 3      | 22.819        | BB   | 0.6029      | 3.45202e4    | 889.31696    | 74.9767 |
| 4      | 35.426        | BB   | 0.8361      | 503.56711    | 7.58978      | 1.0937  |

4ak



DAD1 A, Sig=254,4 Ref=360,100 (E:\WXW\DATA\ZHAOMIN\20180228\LNK002212.D)

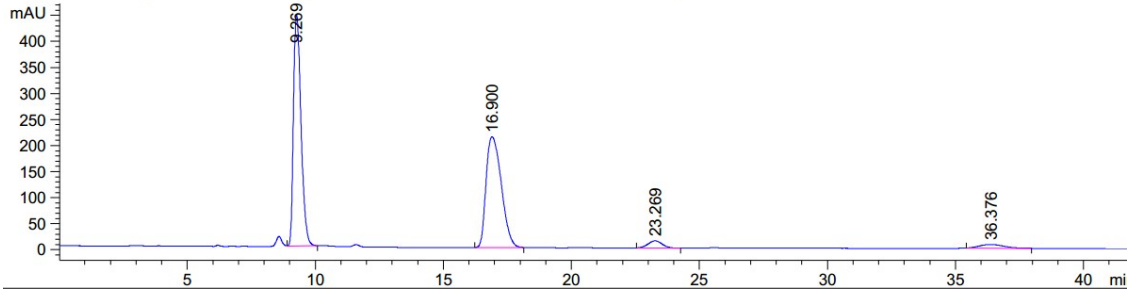

| Peak # | RetTime [min] | Type | Width [min] | Area [mAU*s] | Height [mAU] | Area %  |
|--------|---------------|------|-------------|--------------|--------------|---------|
| 1      | 9.269         | VB   | 0.3212      | 9099.91895   | 443.81271    | 48.1549 |
| 2      | 16.900        | BB   | 0.6685      | 8795.99512   | 212.69055    | 46.5466 |
| 3      | 23.269        | BB   | 0.5789      | 527.49841    | 13.77225     | 2.7914  |
| 4      | 36.376        | BB   | 0.8334      | 473.76929    | 7.10972      | 2.5071  |

DAD1 C, Sig=210,8 Ref=360,100 (E:\WXW\DATA\ZHAOMIN\20180228\LNK002213.D)

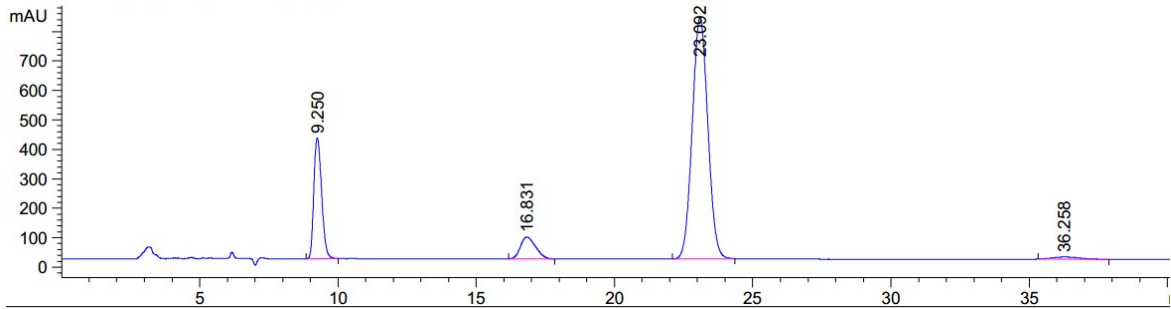

| Peak # | RetTime [min] | Type | Width [min] | Area [mAU*s] | Height [mAU] | Area %  |
|--------|---------------|------|-------------|--------------|--------------|---------|
| 1      | 9.250         | BB   | 0.3104      | 8032.92334   | 410.36209    | 18.4448 |
| 2      | 16.831        | BB   | 0.5864      | 2841.07178   | 74.58701     | 6.5235  |
| 3      | 23.092        | BB   | 0.6167      | 3.21758e4    | 818.36340    | 73.8805 |
| 4      | 36.258        | BB   | 0.8182      | 501.35312    | 7.43965      | 1.1512  |

### 4al

DAD1 A, Sig=254,4 Ref=360,100 (SNAPSHOT.D)

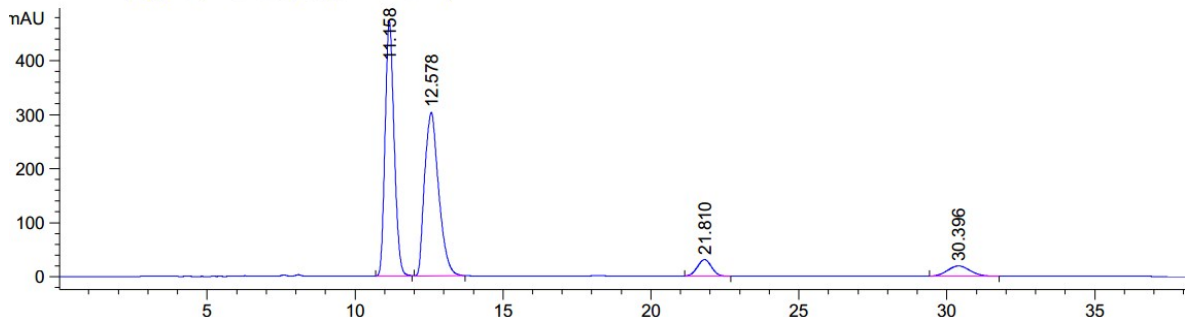

| Peak # | RetTime [min] | Type | Width [min] | Area [mAU*s] | Height [mAU] | Area %  |
|--------|---------------|------|-------------|--------------|--------------|---------|
| 1      | 11.158        | BB   | 0.3269      | 1.00175e4    | 473.29077    | 45.3022 |
| 2      | 12.578        | BB   | 0.5218      | 1.00276e4    | 303.24808    | 45.3481 |
| 3      | 21.810        | BB   | 0.5266      | 1046.60791   | 30.94072     | 4.7331  |
| 4      | 30.396        | BB   | 0.8162      | 1020.84064   | 19.07943     | 4.6166  |

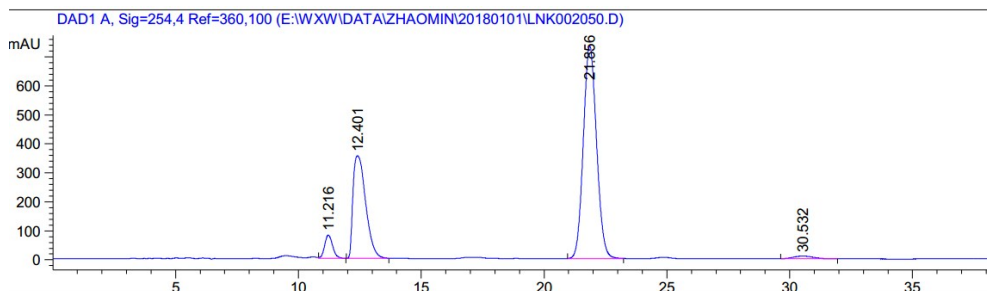

| Peak # | RetTime [min] | Type | Width [min] | Area [mAU*s] | Height [mAU] | Area %  |
|--------|---------------|------|-------------|--------------|--------------|---------|
| 1      | 11.216        | VB   | 0.3594      | 1848.90442   | 80.67911     | 4.3434  |
| 2      | 12.401        | BB   | 0.5601      | 1.26892e4    | 354.06964    | 29.8093 |
| 3      | 21.856        | BB   | 0.5847      | 2.74766e4    | 734.05243    | 64.5479 |
| 4      | 30.532        | BB   | 0.7887      | 553.07794    | 9.59141      | 1.2993  |

#### 4ca

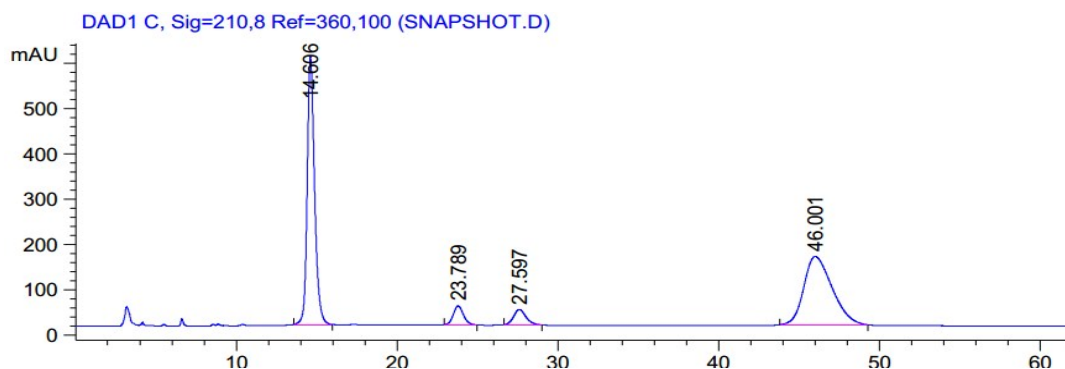

| Peak # | RetTime [min] | Type | Width [min] | Area [mAU*s] | Height [mAU] | Area %  |
|--------|---------------|------|-------------|--------------|--------------|---------|
| 1      | 14.606        | BB   | 0.4848      | 1.89169e4    | 592.07306    | 45.7974 |
| 2      | 23.789        | BB   | 0.6816      | 1885.31592   | 42.32897     | 4.5643  |
| 3      | 27.597        | BB   | 0.8285      | 1867.12695   | 34.44213     | 4.5203  |
| 4      | 46.001        | BB   | 1.7531      | 1.86363e4    | 151.71902    | 45.1180 |

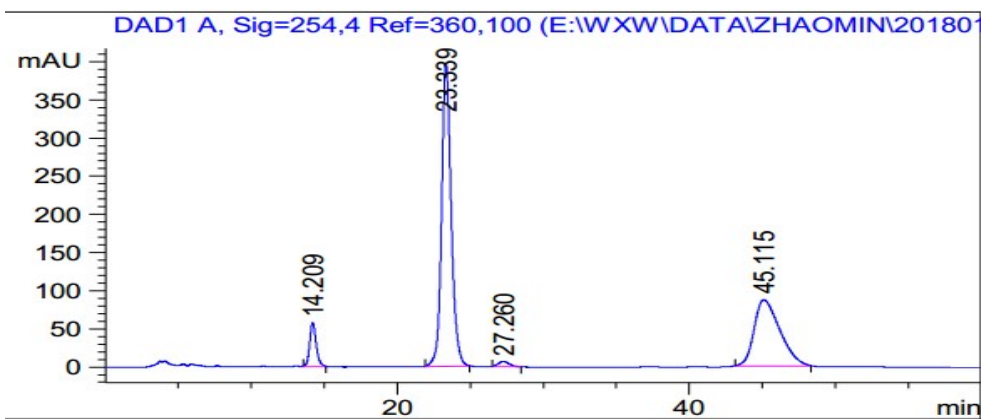

| Peak # | RetTime [min] | Type | Width [min] | Area [mAU*s] | Height [mAU] | Area %  |
|--------|---------------|------|-------------|--------------|--------------|---------|
| 1      | 14.209        | BB   | 0.4659      | 1762.58118   | 57.46173     | 5.7002  |
| 2      | 23.339        | BB   | 0.6929      | 1.81484e4    | 397.29779    | 58.6920 |
| 3      | 27.260        | BB   | 0.7380      | 368.39597    | 7.13978      | 1.1914  |
| 4      | 45.115        | BB   | 1.8203      | 1.06420e4    | 86.80717     | 34.4164 |

4da

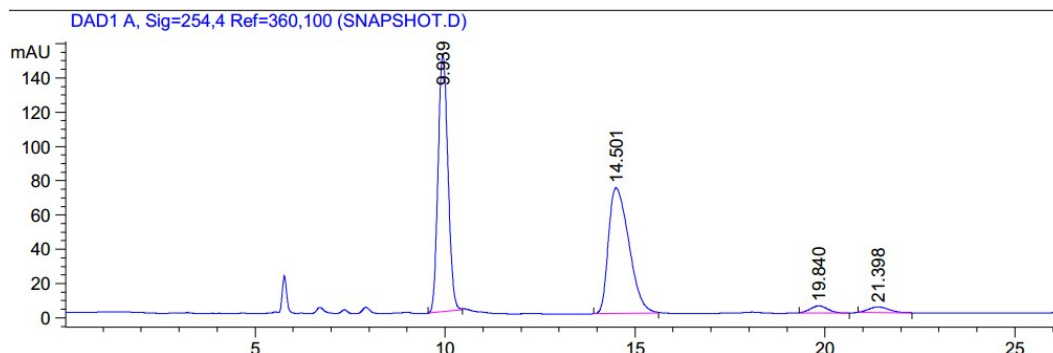

| Peak # | RetTime [min] | Type | Width [min] | Area [mAU*s] | Height [mAU] | Area %  |
|--------|---------------|------|-------------|--------------|--------------|---------|
| 1      | 9.939         | BB   | 0.2850      | 2716.88306   | 150.25201    | 47.4459 |
| 2      | 14.501        | BB   | 0.6057      | 2752.22021   | 73.36610     | 48.0630 |
| 3      | 19.840        | BB   | 0.4905      | 131.45578    | 4.11714      | 2.2957  |
| 4      | 21.398        | BB   | 0.5718      | 125.71352    | 3.34981      | 2.1954  |

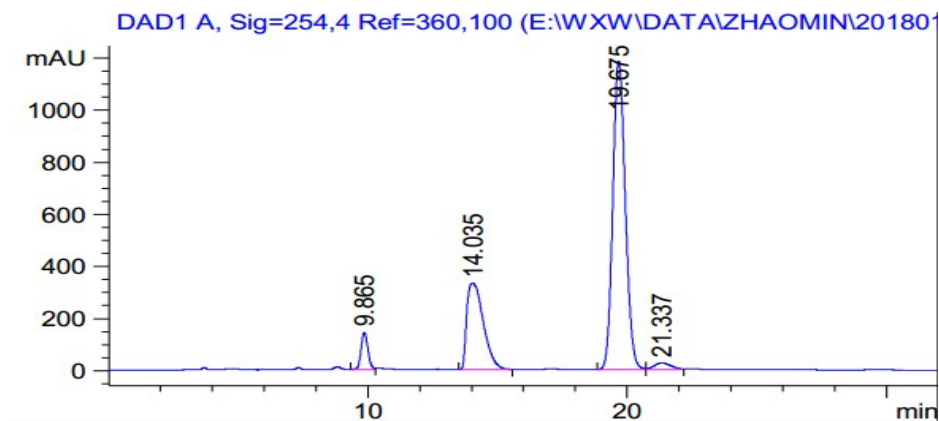

| Peak # | RetTime [min] | Type | Width [min] | Area [mAU*s] | Height [mAU] | Area %  |
|--------|---------------|------|-------------|--------------|--------------|---------|
| 1      | 9.865         | BV   | 0.2905      | 2625.63623   | 141.48164    | 4.5107  |
| 2      | 14.035        | BB   | 0.6900      | 1.47350e4    | 331.86652    | 25.3140 |
| 3      | 19.675        | BB   | 0.5201      | 3.96313e4    | 1185.09717   | 68.0844 |
| 4      | 21.337        | BV   | 0.7115      | 1217.07593   | 26.02862     | 2.0909  |

**4fa**

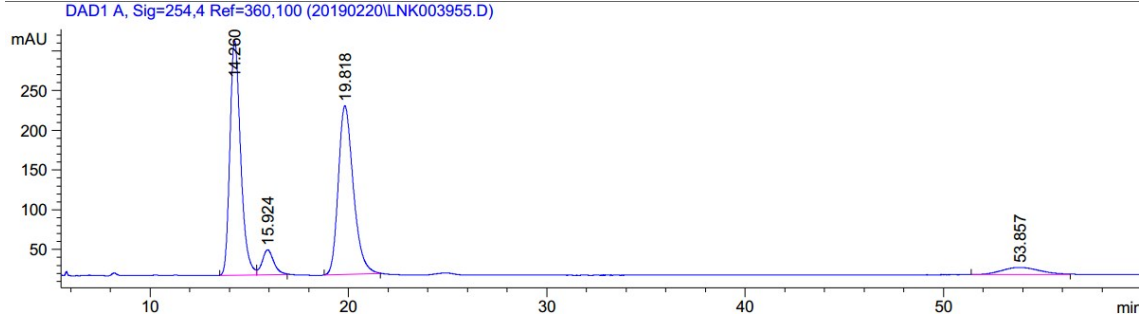

| Peak # | RetTime [min] | Type | Width [min] | Area [mAU*s] | Height [mAU] | Area %  |
|--------|---------------|------|-------------|--------------|--------------|---------|
| 1      | 14.260        | BB   | 0.5770      | 1.11063e4    | 295.18845    | 44.8053 |
| 2      | 15.924        | BB   | 0.6115      | 1263.37683   | 31.39486     | 5.0967  |
| 3      | 19.818        | BB   | 0.8045      | 1.12316e4    | 212.55714    | 45.3109 |
| 4      | 53.857        | MM R | 2.1986      | 1186.60864   | 8.99529      | 4.7870  |

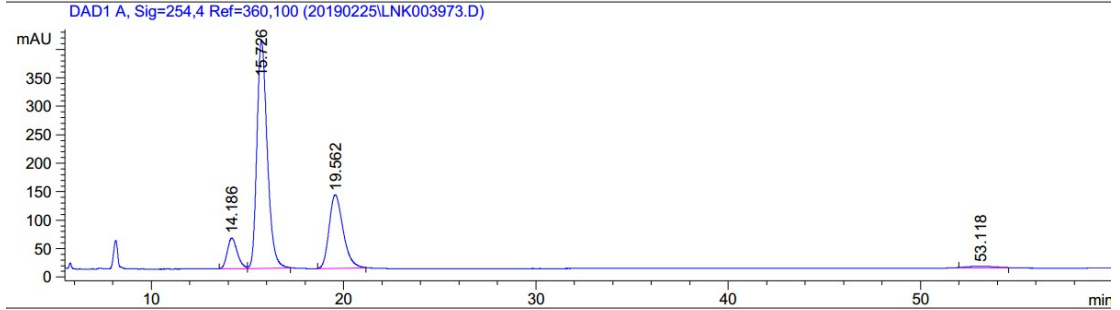

| Peak # | RetTime [min] | Type | Width [min] | Area [mAU*s] | Height [mAU] | Area %  |
|--------|---------------|------|-------------|--------------|--------------|---------|
| 1      | 14.186        | BV   | 0.5580      | 1963.17993   | 54.01295     | 8.2452  |
| 2      | 15.726        | VB   | 0.5723      | 1.49737e4    | 400.42914    | 62.8884 |
| 3      | 19.562        | BB   | 0.7741      | 6543.13037   | 129.35536    | 27.4806 |
| 4      | 53.118        | MM R | 1.8247      | 329.95038    | 3.01382      | 1.3858  |

**4ga**

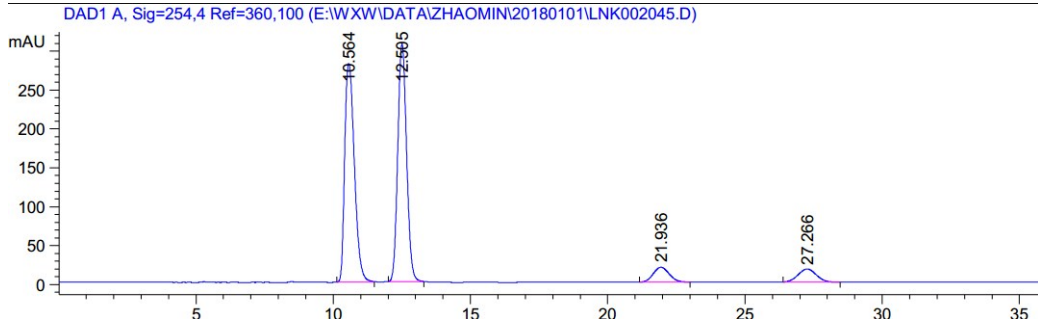

| Peak # | RetTime [min] | Type | Width [min] | Area [mAU*s] | Height [mAU] | Area %  |
|--------|---------------|------|-------------|--------------|--------------|---------|
| 1      | 10.564        | BB   | 0.3847      | 6863.06836   | 281.26978    | 44.9849 |
| 2      | 12.505        | BB   | 0.3506      | 6840.53418   | 306.23340    | 44.8372 |
| 3      | 21.936        | BB   | 0.6269      | 777.68292    | 19.18669     | 5.0974  |
| 4      | 27.266        | BB   | 0.7041      | 775.11035    | 16.80664     | 5.0806  |

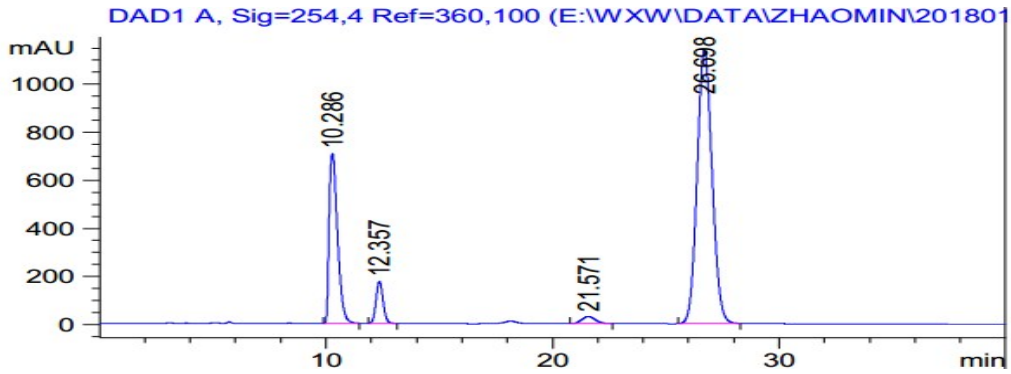

| Peak # | RetTime [min] | Type | Width [min] | Area [mAU*s] | Height [mAU] | Area %  |
|--------|---------------|------|-------------|--------------|--------------|---------|
| 1      | 10.286        | BB   | 0.3973      | 1.82455e4    | 706.37140    | 24.1436 |
| 2      | 12.357        | BB   | 0.3410      | 3806.53174   | 174.18172    | 5.0371  |
| 3      | 21.571        | BB   | 0.6359      | 1193.07422   | 29.25087     | 1.5788  |
| 4      | 26.698        | BB   | 0.7169      | 5.23255e4    | 1136.94495   | 69.2406 |

#### 4ha

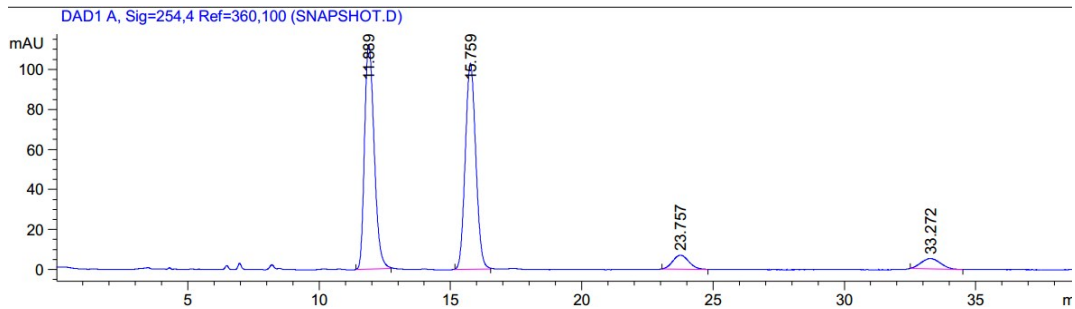

| Peak # | RetTime [min] | Type | Width [min] | Area [mAU*s] | Height [mAU] | Area %  |
|--------|---------------|------|-------------|--------------|--------------|---------|
| 1      | 11.889        | BB   | 0.4029      | 2869.59204   | 112.00312    | 45.5590 |
| 2      | 15.759        | BB   | 0.4369      | 2861.90405   | 102.77763    | 45.4369 |
| 3      | 23.757        | BB   | 0.6199      | 297.57581    | 7.02848      | 4.7244  |
| 4      | 33.272        | BB   | 0.6706      | 269.56238    | 5.21915      | 4.2797  |

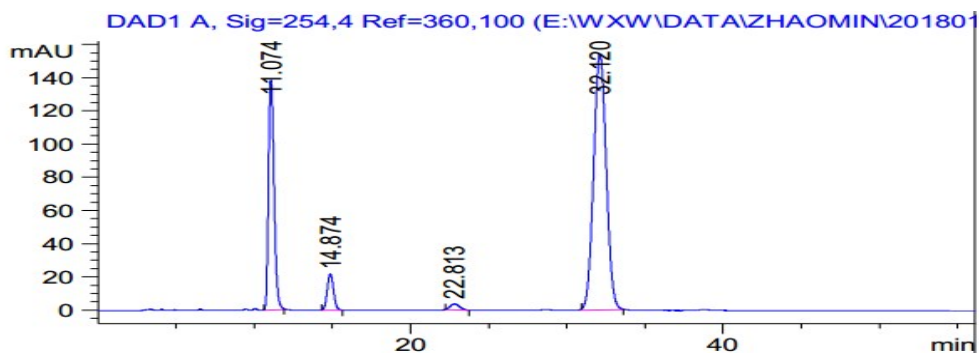

| Peak # | RetTime [min] | Type | Width [min] | Area [mAU*s] | Height [mAU] | Area %  |
|--------|---------------|------|-------------|--------------|--------------|---------|
| 1      | 11.074        | BB   | 0.3912      | 3433.91016   | 138.51617    | 26.7334 |
| 2      | 14.874        | BB   | 0.4460      | 614.70026    | 21.86459     | 4.7855  |
| 3      | 22.813        | BB   | 0.5943      | 150.42392    | 3.59381      | 1.1711  |
| 4      | 32.120        | BB   | 0.8776      | 8645.97559   | 154.32677    | 67.3100 |

#### 4ia

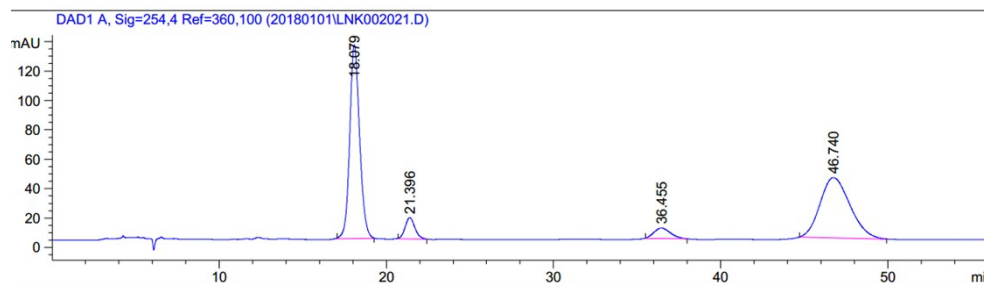

| Peak # | RetTime [min] | Type | Width [min] | Area [mAU*s] | Height [mAU] | Area %  |
|--------|---------------|------|-------------|--------------|--------------|---------|
| 1      | 18.079        | BB   | 0.6303      | 5414.84277   | 131.53760    | 46.6623 |
| 2      | 21.396        | BB   | 0.6131      | 585.04651    | 14.48965     | 5.0416  |
| 3      | 36.455        | BB   | 0.8339      | 492.54758    | 7.13043      | 4.2445  |
| 4      | 46.740        | BB   | 1.6229      | 5111.87549   | 40.99157     | 44.0515 |

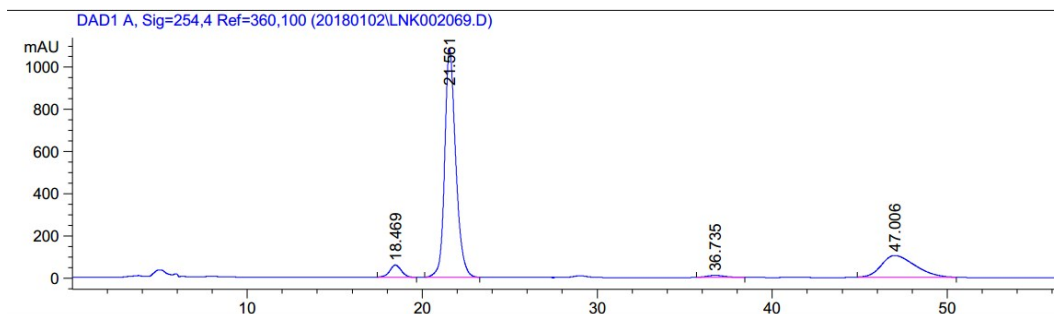

| Peak # | RetTime [min] | Type | Width [min] | Area [mAU*s] | Height [mAU] | Area %  |
|--------|---------------|------|-------------|--------------|--------------|---------|
| 1      | 18.469        | BB   | 0.7143      | 2711.56616   | 58.33255     | 4.1917  |
| 2      | 21.561        | BB   | 0.6652      | 4.74612e4    | 1083.21875   | 73.3676 |
| 3      | 36.735        | BB   | 0.9284      | 686.20422    | 9.61710      | 1.0608  |
| 4      | 47.006        | BB   | 1.9260      | 1.38306e4    | 103.56478    | 21.3800 |

4ja

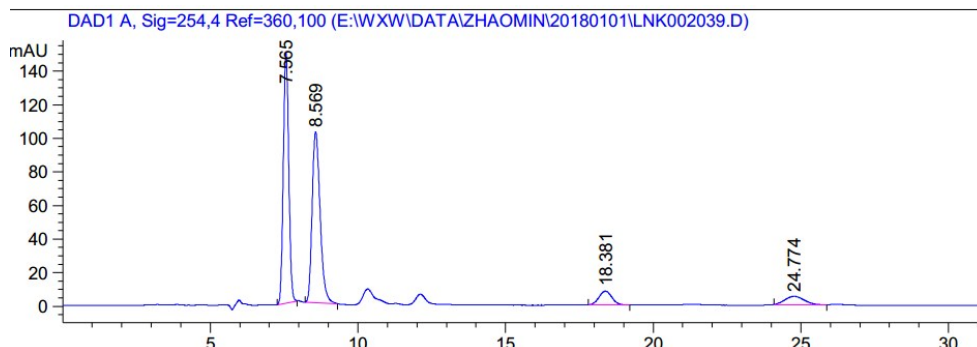

| Peak # | RetTime [min] | Type | Width [min] | Area [mAU*s] | Height [mAU] | Area %  |
|--------|---------------|------|-------------|--------------|--------------|---------|
| 1      | 7.565         | BB   | 0.2014      | 1909.74463   | 149.15356    | 44.3910 |
| 2      | 8.569         | BB   | 0.2939      | 1917.96118   | 101.75131    | 44.5820 |
| 3      | 18.381        | BB   | 0.4795      | 252.00247    | 8.27026      | 5.8577  |
| 4      | 24.774        | BB   | 0.6385      | 222.38800    | 4.96601      | 5.1693  |

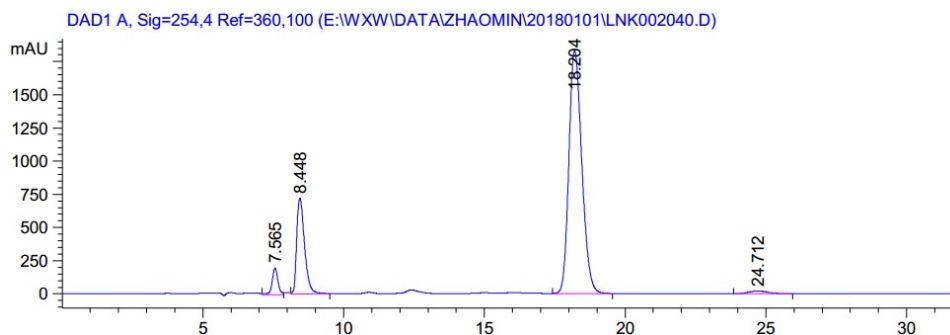

| Peak # | RetTime [min] | Type | Width [min] | Area [mAU*s] | Height [mAU] | Area %  |
|--------|---------------|------|-------------|--------------|--------------|---------|
| 1      | 7.565         | VV   | 0.2209      | 2925.07520   | 202.02441    | 3.8345  |
| 2      | 8.448         | VB   | 0.2990      | 1.40558e4    | 722.28290    | 18.4257 |
| 3      | 18.204        | BB   | 0.4922      | 5.83309e4    | 1828.60559   | 76.4658 |
| 4      | 24.712        | BB   | 0.7313      | 971.82263    | 20.71782     | 1.2740  |

#### 4la

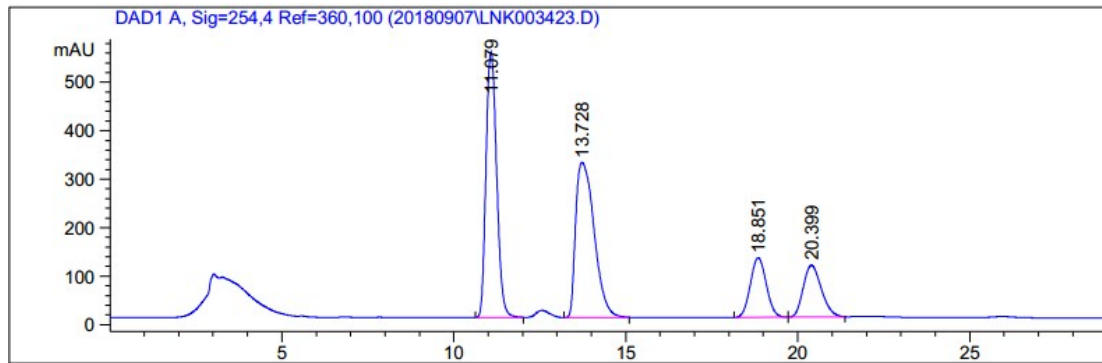

| Peak # | RetTime [min] | Type | Width [min] | Area [mAU*s] | Height [mAU] | Area %  |
|--------|---------------|------|-------------|--------------|--------------|---------|
| 1      | 11.079        | BB   | 0.3416      | 1.18163e4    | 547.96869    | 37.3156 |
| 2      | 13.728        | VB   | 0.5958      | 1.19598e4    | 320.18869    | 37.7688 |
| 3      | 18.851        | BB   | 0.5065      | 3979.33496   | 123.30418    | 12.5667 |
| 4      | 20.399        | BB   | 0.5708      | 3910.39697   | 106.88630    | 12.3489 |

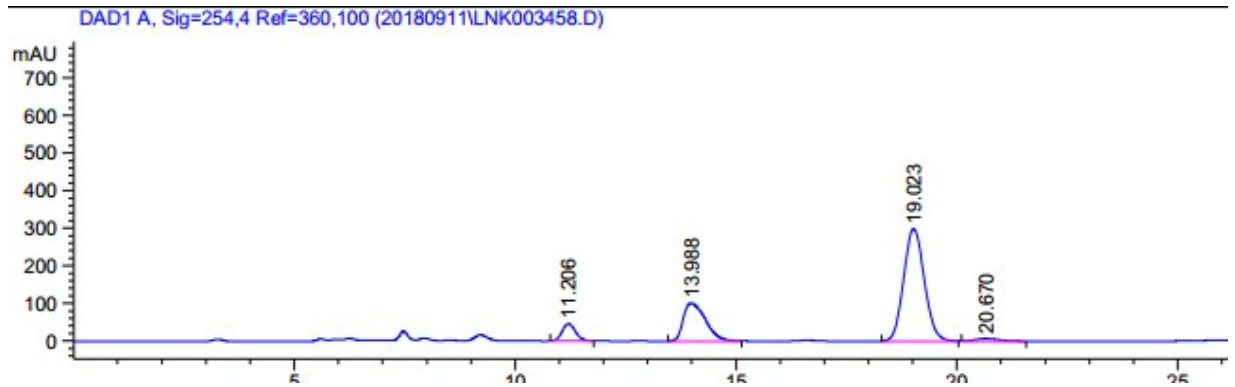

| Peak # | RetTime [min] | Type | Width [min] | Area [mAU*s] | Height [mAU] | Area %  |
|--------|---------------|------|-------------|--------------|--------------|---------|
| 1      | 11.206        | BB   | 0.3326      | 964.33167    | 45.62113     | 6.6395  |
| 2      | 13.988        | BB   | 0.5637      | 3523.71997   | 101.32996    | 24.2609 |
| 3      | 19.023        | BB   | 0.5088      | 9768.40723   | 299.24765    | 67.2558 |
| 4      | 20.670        | BB   | 0.5828      | 267.80759    | 6.96214      | 1.8439  |

#### 4ma



DAD1 A, Sig=254,4 Ref=360,100 (20180911\LNK003456.D)

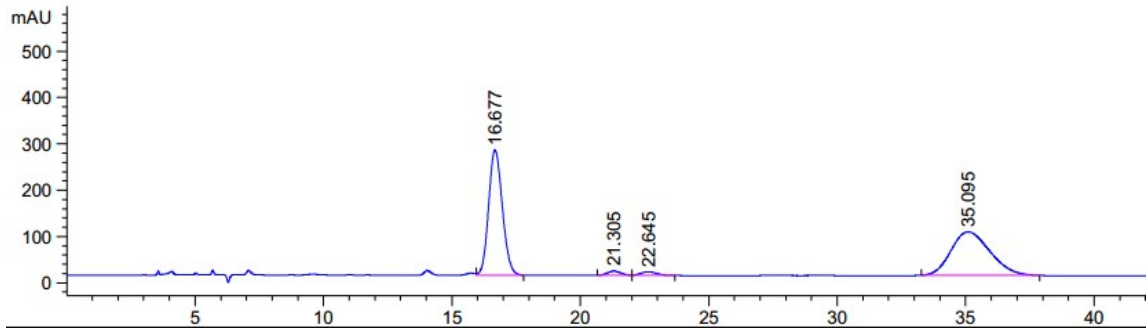

| Peak # | RetTime [min] | Type | Width [min] | Area [mAU*s] | Height [mAU] | Area %  |
|--------|---------------|------|-------------|--------------|--------------|---------|
| 1      | 16.677        | VB   | 0.5804      | 1.00694e4    | 270.46426    | 48.5126 |
| 2      | 21.305        | BV   | 0.5558      | 336.58624    | 9.30873      | 1.6216  |
| 3      | 22.645        | VB   | 0.6321      | 345.70663    | 8.12938      | 1.6655  |
| 4      | 35.095        | BB   | 1.6029      | 1.00046e4    | 94.21230     | 48.2002 |

DAD1 A, Sig=254,4 Ref=360,100 (20180911\LNK003457.D)

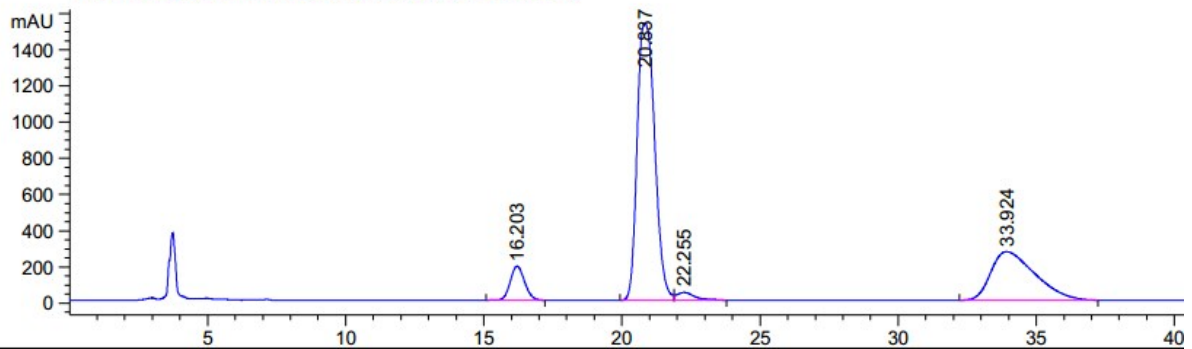

| Peak # | RetTime [min] | Type | Width [min] | Area [mAU*s] | Height [mAU] | Area %  |
|--------|---------------|------|-------------|--------------|--------------|---------|
| 1      | 16.203        | BB   | 0.5623      | 6823.99658   | 188.53024    | 6.4033  |
| 2      | 20.837        | BV   | 0.7018      | 6.77640e4    | 1532.72839   | 63.5860 |
| 3      | 22.255        | VB   | 0.6956      | 2060.57324   | 43.57943     | 1.9335  |
| 4      | 33.924        | BB   | 1.6216      | 2.99221e4    | 269.03339    | 28.0772 |

4na

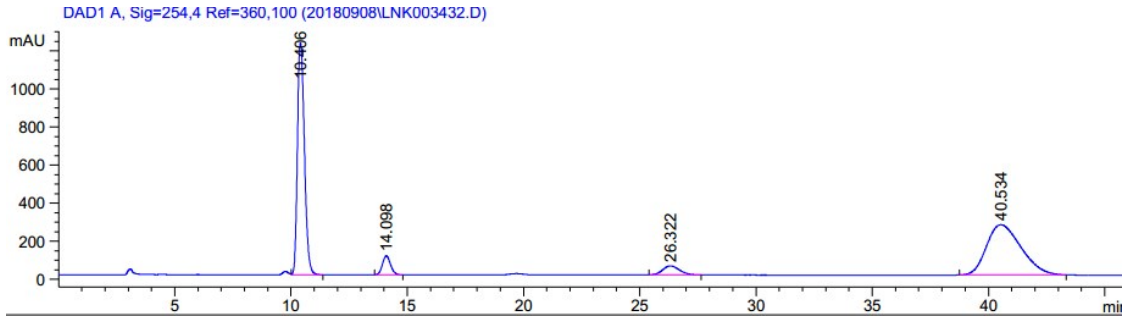

| Peak # | RetTime [min] | Type | Width [min] | Area [mAU*s] | Height [mAU] | Area %  |
|--------|---------------|------|-------------|--------------|--------------|---------|
| 1      | 10.406        | VB   | 0.3273      | 2.54397e4    | 1219.91138   | 44.2089 |
| 2      | 14.098        | BB   | 0.3786      | 2448.89673   | 100.37071    | 4.2557  |
| 3      | 26.322        | BB   | 0.7614      | 2379.55469   | 47.75035     | 4.1352  |
| 4      | 40.534        | BB   | 1.5710      | 2.72761e4    | 264.07663    | 47.4002 |

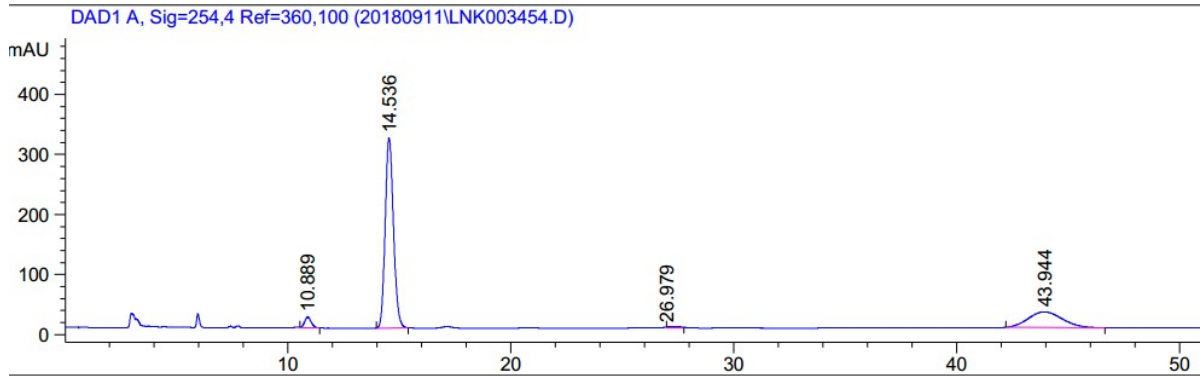

| Peak # | RetTime [min] | Type | Width [min] | Area [mAU*s] | Height [mAU] | Area %  |
|--------|---------------|------|-------------|--------------|--------------|---------|
| 1      | 10.889        | BB   | 0.3190      | 380.38766    | 18.26397     | 3.3385  |
| 2      | 14.536        | BB   | 0.4008      | 8172.50195   | 316.96701    | 71.7263 |
| 3      | 26.979        | MM R | 0.5763      | 64.27321     | 7.20372e-1   | 0.5641  |
| 4      | 43.944        | BB   | 1.2633      | 2776.84546   | 26.18272     | 24.3711 |

**40a**

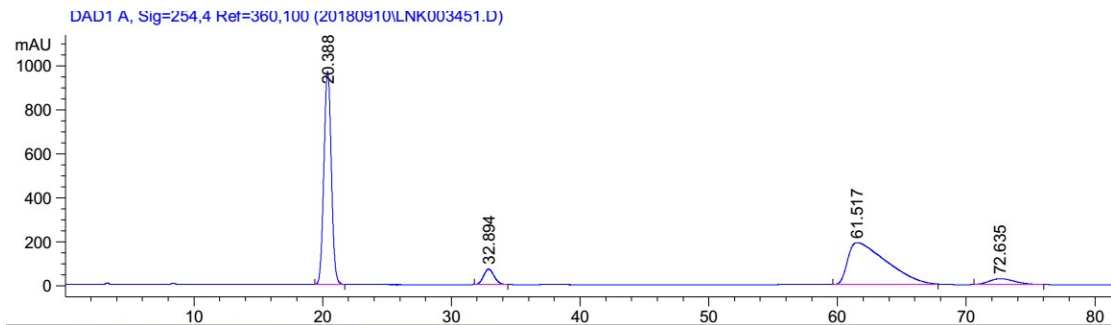

| Peak # | RetTime [min] | Type | Width [min] | Area [mAU*s] | Height [mAU] | Area %  |
|--------|---------------|------|-------------|--------------|--------------|---------|
| 1      | 20.388        | BB   | 0.6291      | 3.88491e4    | 970.39832    | 45.2241 |
| 2      | 32.894        | BB   | 0.8722      | 4008.05371   | 70.61563     | 4.6658  |
| 3      | 61.517        | BB   | 2.6621      | 3.94215e4    | 190.20027    | 45.8904 |
| 4      | 72.635        | BB   | 1.6148      | 3624.87061   | 26.41745     | 4.2197  |

DAD1 A, Sig=254,4 Ref=360,100 (20180910LNK003450.D)

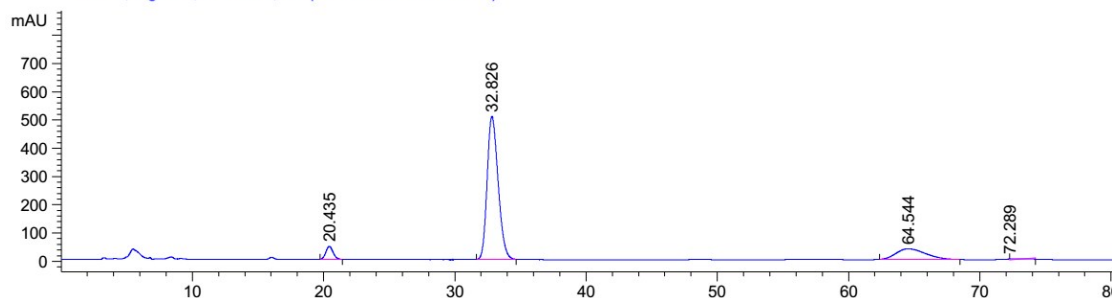

| Peak # | RetTime [min] | Type | Width [min] | Area [mAU*s] | Height [mAU] | Area %  |
|--------|---------------|------|-------------|--------------|--------------|---------|
| 1      | 20.435        | BB   | 0.6004      | 1801.82617   | 46.67205     | 4.8241  |
| 2      | 32.826        | BB   | 0.9047      | 2.94858e4    | 506.82828    | 78.9436 |
| 3      | 64.544        | BB   | 1.8420      | 5930.33350   | 37.80797     | 15.8776 |
| 4      | 72.289        | MM R | 0.8840      | 132.49513    | 2.70836      | 0.3547  |

#### 4pa

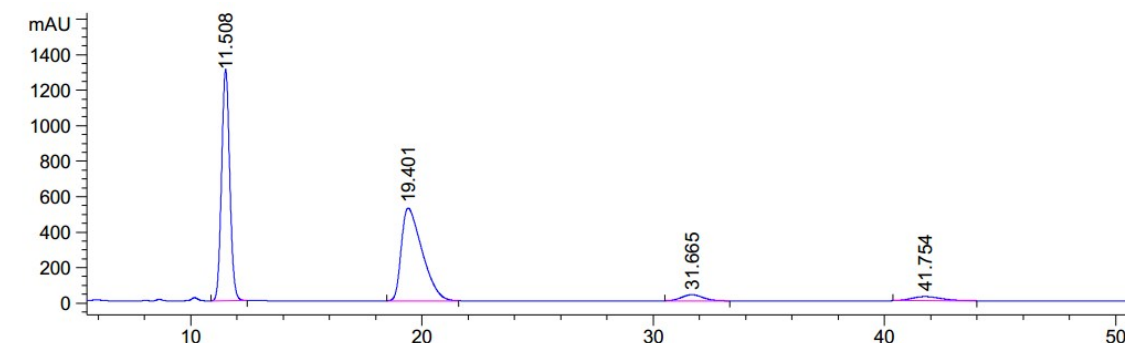

| Peak # | RetTime [min] | Type | Width [min] | Area [mAU*s] | Height [mAU] | Area %  |
|--------|---------------|------|-------------|--------------|--------------|---------|
| 1      | 11.508        | BB   | 0.3850      | 3.20802e4    | 1303.98730   | 46.5398 |
| 2      | 19.401        | BB   | 0.9398      | 3.25986e4    | 522.54651    | 47.2918 |
| 3      | 31.665        | BB   | 0.9110      | 2178.42407   | 34.38948     | 3.1603  |
| 4      | 41.754        | BB   | 1.0609      | 2073.45142   | 23.28378     | 3.0080  |

DAD1 C, Sig=210,8 Ref=360,100 (20190121\LNK003927.D)

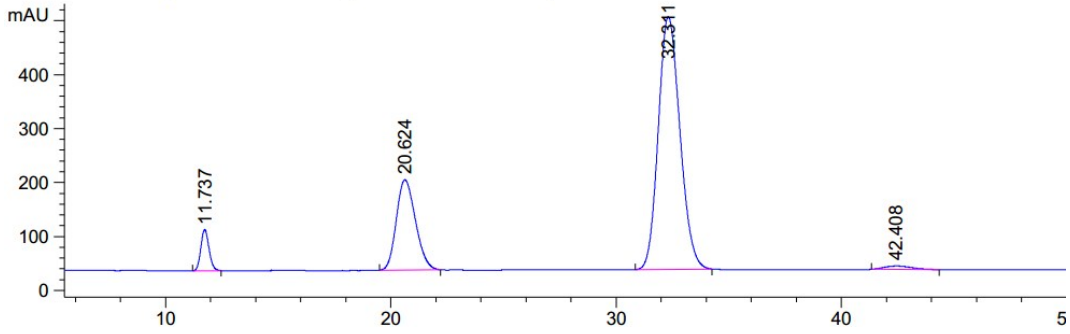

| Peak # | RetTime [min] | Type | Width [min] | Area [mAU*s] | Height [mAU] | Area %  |
|--------|---------------|------|-------------|--------------|--------------|---------|
| 1      | 11.737        | BB   | 0.3895      | 1939.28589   | 76.57458     | 4.4328  |
| 2      | 20.624        | BB   | 0.8977      | 9917.28320   | 167.75404    | 22.6686 |
| 3      | 32.311        | BB   | 1.0160      | 3.13381e4    | 468.73779    | 71.6316 |
| 4      | 42.408        | BB   | 1.0019      | 554.29028    | 6.50614      | 1.2670  |

4qa

DAD1 A, Sig=254,4 Ref=360,100 (20190227\LNK003993.D)

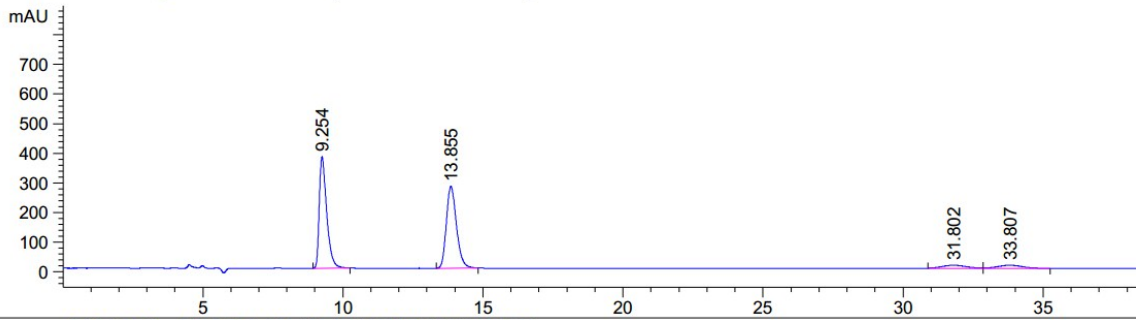

| Peak # | RetTime [min] | Type | Width [min] | Area [mAU*s] | Height [mAU] | Area %  |
|--------|---------------|------|-------------|--------------|--------------|---------|
| 1      | 9.254         | BB   | 0.2777      | 6978.85107   | 377.43103    | 45.9645 |
| 2      | 13.855        | BB   | 0.3879      | 6968.08252   | 276.61566    | 45.8935 |
| 3      | 31.802        | BV   | 0.7454      | 601.78363    | 10.30426     | 3.9635  |
| 4      | 33.807        | VB   | 0.7154      | 634.42413    | 10.52291     | 4.1785  |

DAD1 C, Sig=210,8 Ref=360,100 (20190301\LNK003998.D)

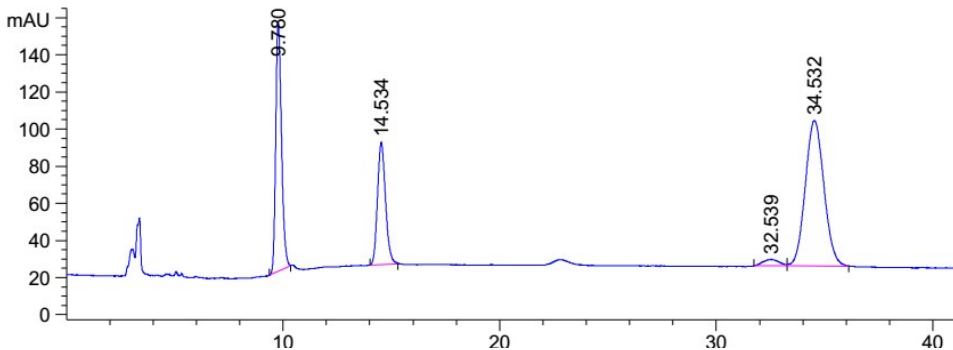

| Peak # | RetTime [min] | Type | Width [min] | Area [mAU*s] | Height [mAU] | Area %  |
|--------|---------------|------|-------------|--------------|--------------|---------|
| 1      | 4.616         | BV   | 0.2416      | 22.41961     | 1.27206      | 0.6263  |
| 2      | 5.067         | VV   | 0.1434      | 9.76055      | 1.02205      | 0.2727  |
| 3      | 9.780         | BB   | 0.2883      | 1013.92261   | 53.68915     | 28.3233 |
| 4      | 14.533        | BB   | 0.3912      | 664.56439    | 25.91564     | 18.5642 |

#### 4ra

DAD1 A, Sig=254,4 Ref=360,100 (20190121\LNK003924.D)

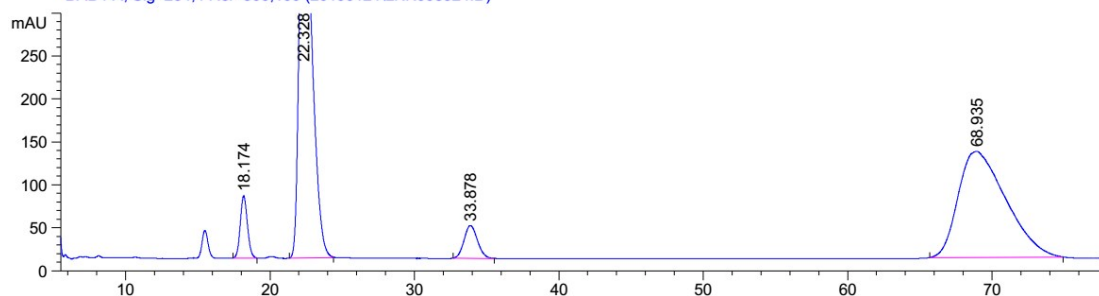

| Peak # | RetTime [min] | Type | Width [min] | Area [mAU*s] | Height [mAU] | Area %  |
|--------|---------------|------|-------------|--------------|--------------|---------|
| 1      | 18.174        | BB   | 0.5316      | 2513.71411   | 72.66383     | 4.0505  |
| 2      | 22.328        | BB   | 0.9281      | 2.87736e4    | 476.77325    | 46.3650 |
| 3      | 33.878        | BB   | 0.9063      | 2457.26465   | 38.20797     | 3.9596  |
| 4      | 68.935        | BB   | 2.6880      | 2.83143e4    | 123.44321    | 45.6249 |

DAD1 A, Sig=254,4 Ref=360,100 (20190121\LNK003937.D)

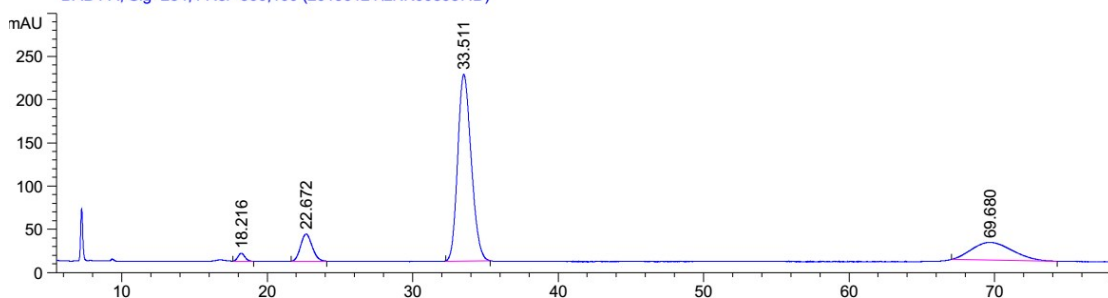

| Peak # | RetTime [min] | Type | Width [min] | Area [mAU*s] | Height [mAU] | Area %  |
|--------|---------------|------|-------------|--------------|--------------|---------|
| 1      | 18.216        | BB   | 0.4904      | 305.30771    | 9.12306      | 1.5212  |
| 2      | 22.672        | BB   | 0.8176      | 1750.78662   | 31.54156     | 8.7233  |
| 3      | 33.511        | BB   | 0.9975      | 1.40013e4    | 216.21440    | 69.7610 |
| 4      | 69.680        | BB   | 2.2837      | 4012.97241   | 20.57299     | 19.9946 |

### 4sa

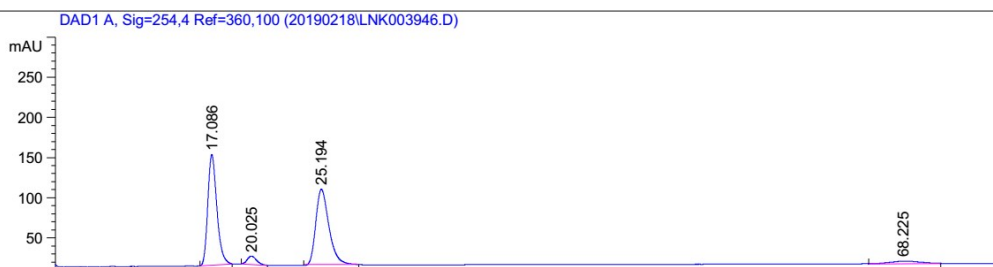

| Peak # | RetTime [min] | Type | Width [min] | Area [mAU*s] | Height [mAU] | Area %  |
|--------|---------------|------|-------------|--------------|--------------|---------|
| 1      | 17.086        | BB   | 0.7083      | 6424.97949   | 137.71626    | 46.6441 |
| 2      | 20.025        | BB   | 0.5952      | 487.45416    | 10.46977     | 3.5388  |
| 3      | 25.194        | MM R | 1.1240      | 6335.46191   | 93.94252     | 45.9943 |
| 4      | 68.225        | MM R | 2.7877      | 526.56506    | 3.14812      | 3.8228  |

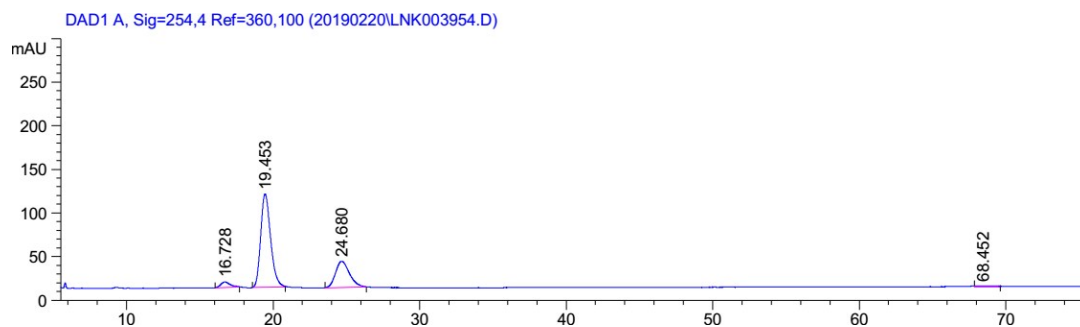

| Peak # | RetTime [min] | Type | Width [min] | Area [mAU*s] | Height [mAU] | Area %  |
|--------|---------------|------|-------------|--------------|--------------|---------|
| 1      | 16.728        | BB   | 0.6281      | 296.27661    | 6.39978      | 4.0201  |
| 2      | 19.453        | BB   | 0.7192      | 5019.65039   | 107.02759    | 68.1102 |
| 3      | 24.680        | BB   | 0.9019      | 1975.96240   | 30.02198     | 26.8113 |
| 4      | 68.452        | MM R | 1.5984      | 78.00200     | 8.13341e-1   | 1.0584  |
| 4      | 30.946        | BB   | 0.8138      | 664.25830    | 10.47570     | 1.5118  |

### 4ta

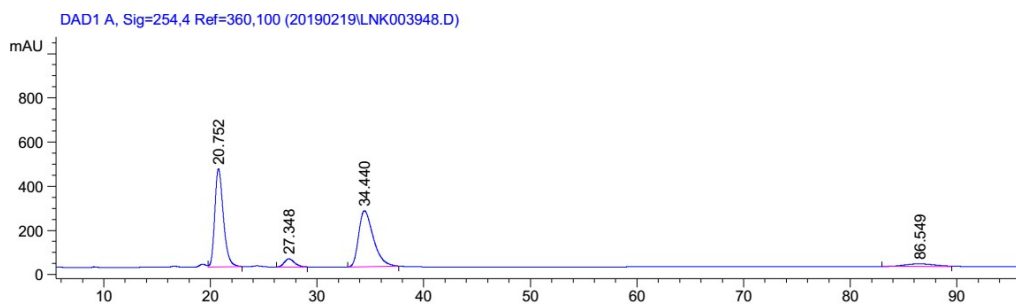

| Peak # | RetTime [min] | Type | Width [min] | Area [mAU*s] | Height [mAU] | Area %  |
|--------|---------------|------|-------------|--------------|--------------|---------|
| 1      | 20.752        | VB   | 0.8541      | 2.48502e4    | 444.61746    | 45.8269 |
| 2      | 27.348        | BB   | 0.9593      | 2484.14209   | 37.00160     | 4.5811  |
| 3      | 34.440        | BB   | 1.4164      | 2.43423e4    | 253.92256    | 44.8901 |
| 4      | 86.549        | MM R | 3.4232      | 2549.65771   | 12.41372     | 4.7019  |

DAD1 A, Sig=254,4 Ref=360,100 (20190219\LNK003949.D)

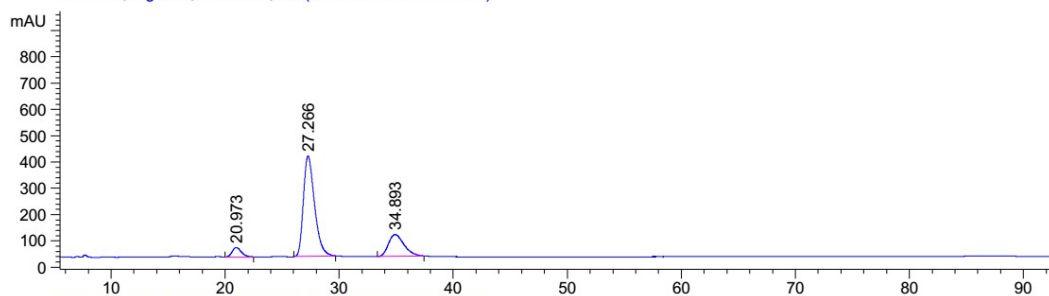

| Peak # | RetTime [min] | Type | Width [min] | Area [mAU*s] | Height [mAU] | Area %  |
|--------|---------------|------|-------------|--------------|--------------|---------|
| 1      | 20.973        | BB   | 0.8198      | 1984.73181   | 35.74358     | 5.5266  |
| 2      | 27.266        | BB   | 1.0262      | 2.59580e4    | 382.27637    | 72.2814 |
| 3      | 34.893        | BB   | 1.3726      | 7969.68896   | 83.27139     | 22.1920 |

#### 4ua

DAD1 A, Sig=254,4 Ref=360,100 (20190227\LNK003988.D)

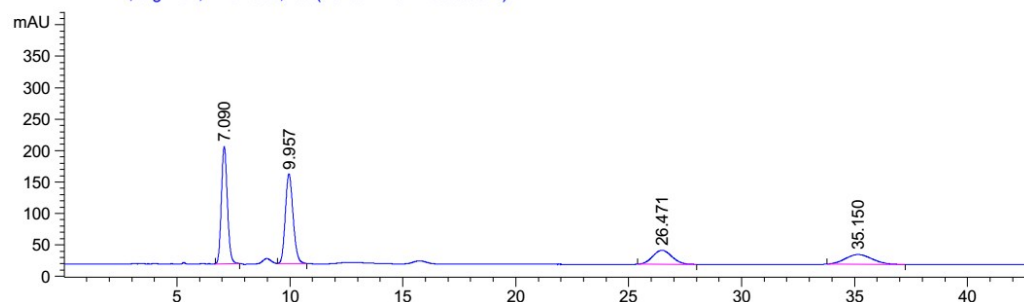

| Peak # | RetTime [min] | Type | Width [min] | Area [mAU*s] | Height [mAU] | Area %  |
|--------|---------------|------|-------------|--------------|--------------|---------|
| 1      | 7.090         | BB   | 0.2842      | 3424.69727   | 186.51723    | 36.2074 |
| 2      | 9.957         | VB   | 0.3690      | 3422.44678   | 143.10637    | 36.1836 |
| 3      | 26.471        | BB   | 0.8113      | 1321.05334   | 22.29454     | 13.9668 |
| 4      | 35.150        | BB   | 1.0124      | 1290.35669   | 15.54483     | 13.6422 |

DAD1 A, Sig=254,4 Ref=360,100 (20190227LKNK003989.D)

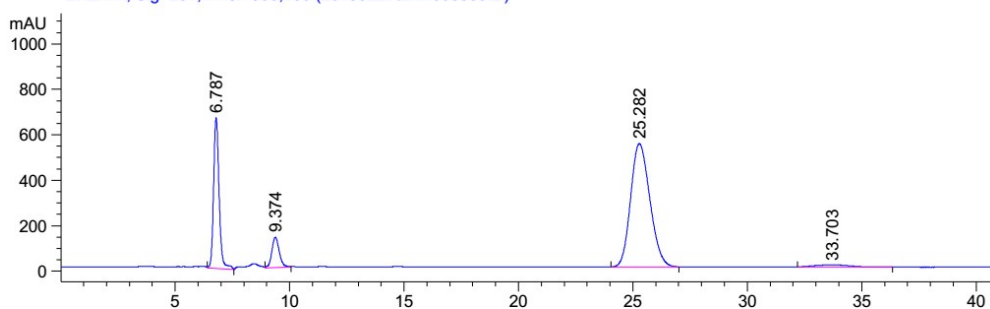

| Peak # | RetTime [min] | Type | Width [min] | Area [mAU*s] | Height [mAU] | Area %  |
|--------|---------------|------|-------------|--------------|--------------|---------|
| 1      | 6.787         | VV   | 0.2568      | 1.10790e4    | 663.39368    | 23.6601 |
| 2      | 9.374         | VB   | 0.3472      | 2978.37769   | 133.03624    | 6.3606  |
| 3      | 25.282        | BB   | 0.9090      | 3.17779e4    | 542.83453    | 67.8642 |
| 4      | 33.703        | BB   | 1.2382      | 990.45007    | 9.37788      | 2.1152  |

5

DAD1 A, Sig=254,4 Ref=360,100 (20190227LKNK003992.D)

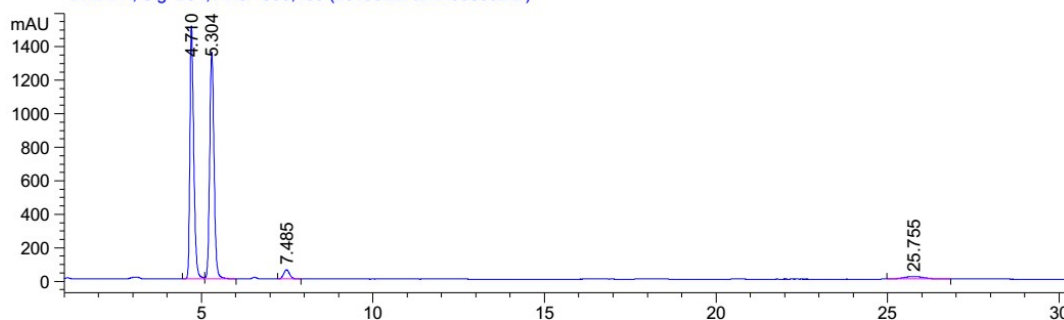

| Peak # | RetTime [min] | Type | Width [min] | Area [mAU*s] | Height [mAU] | Area %  |
|--------|---------------|------|-------------|--------------|--------------|---------|
| 1      | 4.710         | BV   | 0.1188      | 1.17752e4    | 1512.75781   | 46.7102 |
| 2      | 5.304         | VB   | 0.1402      | 1.21142e4    | 1356.80481   | 48.0549 |
| 3      | 7.485         | BB   | 0.1916      | 671.06683    | 54.50545     | 2.6620  |
| 4      | 25.755        | BB   | 0.6388      | 648.61469    | 15.60917     | 2.5729  |

DAD1 A, Sig=254,4 Ref=360,100 (20190227LKNK003994.D)

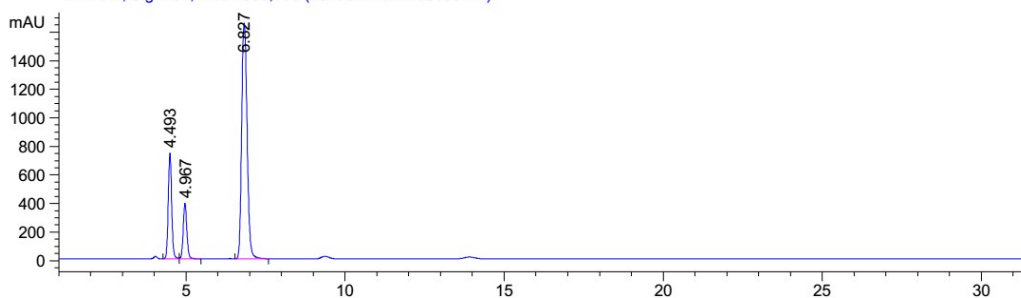



| Peak # | RetTime [min] | Type | Width [min] | Area [mAU*s] | Height [mAU] | Area %  |
|--------|---------------|------|-------------|--------------|--------------|---------|
| 1      | 4.493         | BV   | 0.1137      | 5468.62451   | 744.49805    | 19.4136 |
| 2      | 4.967         | VB   | 0.1198      | 3072.37622   | 390.36728    | 10.9069 |
| 3      | 6.827         | VB   | 0.1871      | 1.96280e4    | 1646.49976   | 69.6794 |

8

DAD1 A, Sig=254,4 Ref=360,100 (20181029\LNK003574.D)

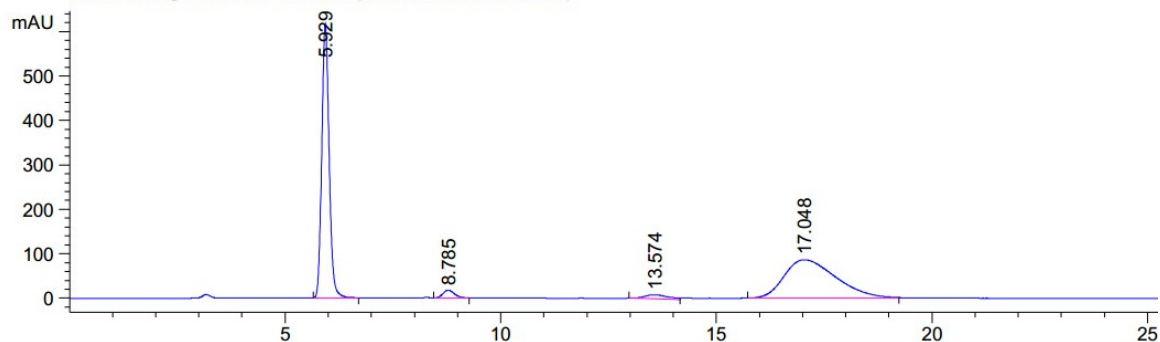

| Peak # | RetTime [min] | Type | Width [min] | Area [mAU*s] | Height [mAU] | Area %  |
|--------|---------------|------|-------------|--------------|--------------|---------|
| 1      | 5.929         | BB   | 0.1815      | 7261.36523   | 615.98218    | 48.1688 |
| 2      | 8.785         | VB   | 0.2938      | 337.46716    | 17.75195     | 2.2386  |
| 3      | 13.574        | MM R | 0.6232      | 343.38284    | 9.18307      | 2.2779  |
| 4      | 17.048        | BB   | 1.2198      | 7132.62256   | 86.15762     | 47.3148 |

DAD1 A, Sig=254,4 Ref=360,100 (20181029\LNK003575.D)

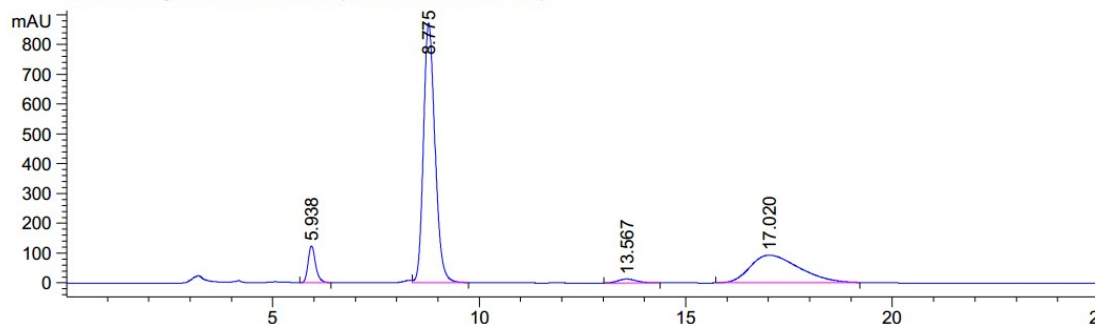

| Peak # | RetTime [min] | Type | Width [min] | Area [mAU*s] | Height [mAU] | Area %  |
|--------|---------------|------|-------------|--------------|--------------|---------|
| 1      | 5.938         | VB   | 0.1883      | 1528.83716   | 123.64040    | 5.7636  |
| 2      | 8.775         | VB   | 0.3005      | 1.69158e4    | 871.28900    | 63.7711 |
| 3      | 13.567        | BB   | 0.4723      | 408.38867    | 13.14992     | 1.5396  |
| 4      | 17.020        | BB   | 1.2397      | 7672.79150   | 92.69875     | 28.9258 |

## 5. Crystal data and ORTEP diagram for compound

X-ray data of **3ab**

---

|                                               |                                                                                                                                                                           |
|-----------------------------------------------|---------------------------------------------------------------------------------------------------------------------------------------------------------------------------|
| Empirical formula                             | C <sub>33</sub> H <sub>23</sub> ClN <sub>4</sub> O                                                                                                                        |
| Formula weight                                | 527.00                                                                                                                                                                    |
| Temperature                                   | 120 K                                                                                                                                                                     |
| Wavelength                                    | 0.71073 Å                                                                                                                                                                 |
| Crystal system, space group                   | triclinic, <i>P</i> -1                                                                                                                                                    |
| Unit cell dimensions                          | <i>a</i> = 9.3289 (4) Å, <i>α</i> = 87.2370 (10) deg.<br><i>b</i> = 10.9229 (5) Å, <i>β</i> = 78.6140 (10) deg.<br><i>c</i> = 12.8668 (6) Å, <i>γ</i> = 85.6810 (10) deg. |
| Volume                                        | 1280.91(10) Å <sup>3</sup>                                                                                                                                                |
| Z, Calculated density                         | 17, 1.730 Mg/cm <sup>3</sup>                                                                                                                                              |
| Absorption coefficient                        | 0.985 mm <sup>-1</sup>                                                                                                                                                    |
| F(000)                                        | 663                                                                                                                                                                       |
| Crystal size                                  | 0.20 x 0.18 x 0.15 mm                                                                                                                                                     |
| Radiation                                     | MoK $\alpha$ ( $\lambda$ = 0.71073)                                                                                                                                       |
| Theta range for data collection               | 1.615 to 27.533 deg.                                                                                                                                                      |
| Index ranges                                  | -12 ≤ <i>h</i> ≤ 12, -14 ≤ <i>k</i> ≤ 14, -16 ≤ <i>l</i> ≤ 16                                                                                                             |
| Reflections collected                         | 42789/5876 [ <i>R</i> (int) = 0.0327]                                                                                                                                     |
| Completeness to theta = 25.242                | 99.8%                                                                                                                                                                     |
| Absorption correction                         | multi-scan                                                                                                                                                                |
| Refinement method                             | Full-matrix least-squares on F <sup>2</sup>                                                                                                                               |
| Data / restraints / parameters                | 5876/0/352                                                                                                                                                                |
| Goodness-of-fit on F <sup>2</sup>             | 1.148                                                                                                                                                                     |
| Final R indexes [ <i>I</i> ≥ 2σ ( <i>I</i> )] | <i>R</i> <sub>1</sub> = 0.0369, <i>wR</i> <sub>2</sub> = 0.1022                                                                                                           |
| Final R indexes [all data]                    | <i>R</i> <sub>1</sub> = 0.0479, <i>wR</i> <sub>2</sub> = 0.1242                                                                                                           |
| Largest diff. peak/hole / eÅ <sup>-3</sup>    | 0.571 and -0.515                                                                                                                                                          |

---

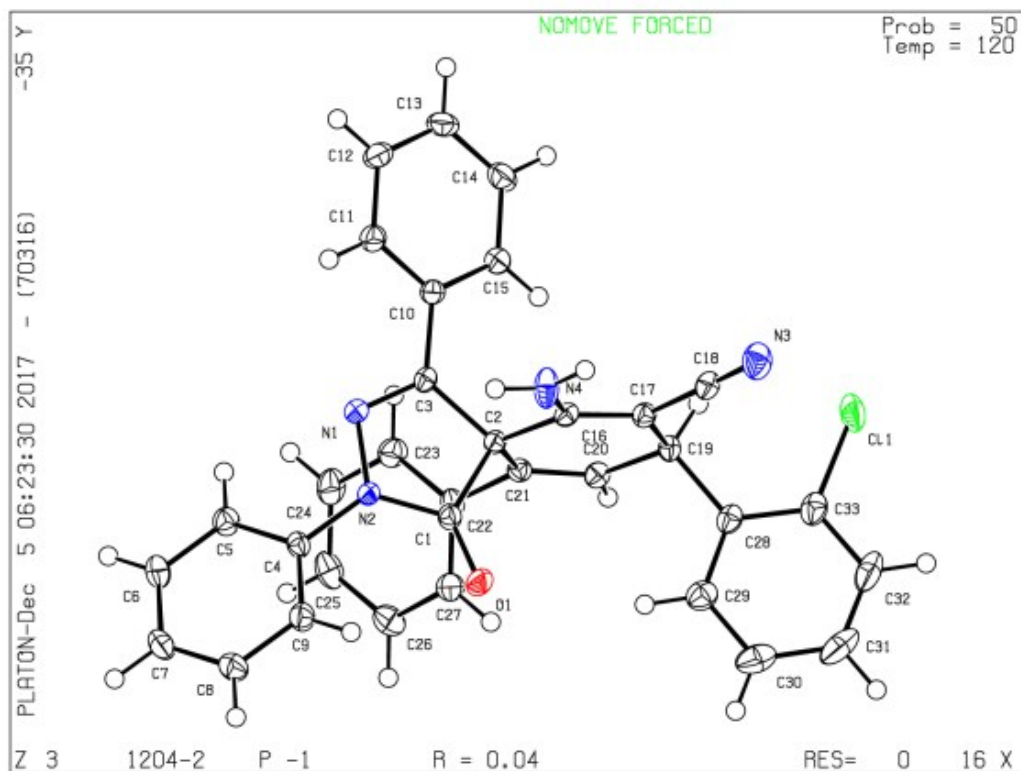

Figure S1. ORTEP drawing of **3ab**

The crystal was prepared from the solution of **3ab** in acetonitrile. CCDC 1821024 contains the supplementary crystallographic data for this paper. These data can be obtained free of charge from The Cambridge Crystallographic Data Centre via [www.ccdc.cam.ac.uk/data request/cif](http://www.ccdc.cam.ac.uk/data_request/cif).

#### X-ray data of **4ab**

|                             |                                                                                                                          |
|-----------------------------|--------------------------------------------------------------------------------------------------------------------------|
| Empirical formula           | $C_{33}H_{23}ClN_4O, CH_3CN$                                                                                             |
| Formula weight              | 568.06                                                                                                                   |
| Temperature                 | 296.15 K                                                                                                                 |
| Wavelength                  | 0.71073 Å                                                                                                                |
| Crystal system, space group | orthorhombic, $P 21 21 21$                                                                                               |
| Unit cell dimensions        | $a = 11.351(2)$ Å, $\alpha = 90$ deg.<br>$b = 11.9996(17)$ Å, $\beta = 90$ deg.<br>$c = 21.215(3)$ Å, $\gamma = 90$ deg. |
| Volume                      | $2889.7(8)$ Å <sup>3</sup>                                                                                               |

---

|                                               |                                                             |
|-----------------------------------------------|-------------------------------------------------------------|
| Z, Calculated density                         | 4, 1.306 Mg/cm <sup>3</sup>                                 |
| Absorption coefficient                        | 0.170 mm <sup>-1</sup>                                      |
| F(000)                                        | 1184                                                        |
| Crystal size                                  | 0.6 x 0.6 x 0.3 mm                                          |
| Radiation                                     | MoK $\alpha$ ( $\lambda = 0.71073$ )                        |
| Theta range for data collection               | 2.47 to 27.55 deg.                                          |
| Limiting indices                              | $-7 \leq h \leq 15, -13 \leq k \leq 16, -27 \leq l \leq 28$ |
| Reflections collected / unique                | 11645/ 7159 [ $R(\text{int}) = 0.0382$ ]                    |
| Completeness to theta = 25.242                | 99.6%                                                       |
| Absorption correction                         | Semi-empirical from equivalents                             |
| Refinement method                             | least-squares                                               |
| Data / restraints / parameters                | 7159/2/386                                                  |
| Goodness-of-fit on F <sup>2</sup>             | 1.078                                                       |
| Final R indexes [ $I \geq 2\sigma(I)$ ]       | $R_1 = 0.0640, wR_2 = 0.1786$                               |
| Final R indexes [all data]                    | $R_1 = 0.0864, wR_2 = 0.1920$                               |
| Largest diff. peak/hole / e $\text{\AA}^{-3}$ | 0.317 and -0.279                                            |
| Absolute structure parameter                  | 0.02(5)                                                     |

---

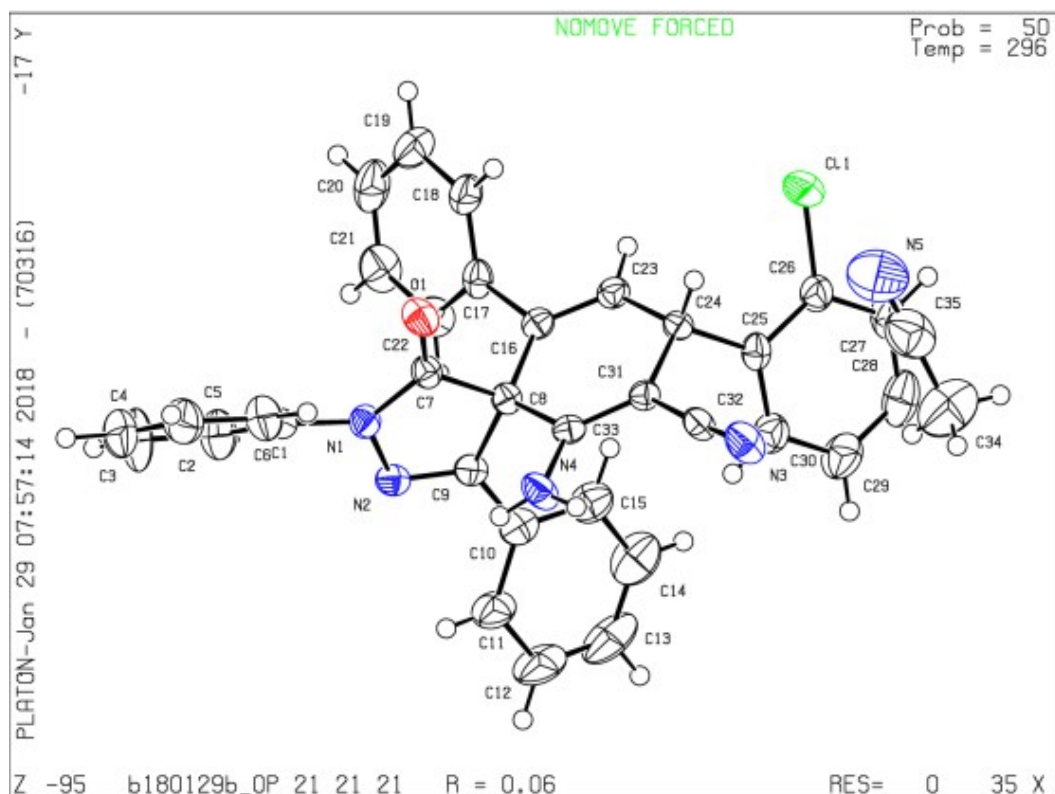

Figure S2. ORTEP drawing of **4ab**

The crystal was prepared from the solution of **4ab** in petroleum ether/n-hexane/ethyl acetate. CCDC 1820660 contains the supplementary crystallographic data for this paper. These data can be obtained free of charge from The Cambridge Crystallographic Data Centre via [www.ccdc.cam.ac.uk/data\\_request/cif](http://www.ccdc.cam.ac.uk/data_request/cif).
